# Supplementary material for: A global analysis of CNVs in swine using whole genome sequence data and association analysis with fatty acid composition and growth traits
Source: PLoS One. 2017 May 4;12(5):e0177014. doi: 10.1371/journal.pone.0177014 (PMC5417718; doi:10.1371/journal.pone.0177014)
Supplement: S1 Table — (XLSX) [file pone.0177014.s005.xlsx]

## Sheet: S1 Table
S1 Table. Primers used for qPCR assays.
CNVR ID	Chr	Gene	No. of tested animals	Forward primer	Reverse primer
112	3	GPAT2	182	5'-AGGTTTGGTCCTTTCATCCTTTG-3'	5'-GGTCCACTCCTGCTCCTTCTC-3'
92	4	CLCA4	182	5'-AGCACGGCAACAGGTAAAATG-3'	5'-TGAGTTGTCTGTCGCCCTGTAC-3'
125	6	CYP4X1	182	5'-ATCCTGGGTGACGGGTCTTC-3'	5'-AAAATCCCGTGGAGCAAACTT-3'
198	6	PLA2G2A	32	5'-CCTGCTATTGGCAGTGATCATG-3'	5'-GCTTCCCTCCCTGCACTGT-3'
160	9	MOGAT2	182	5'-CTGGGTCTTGGAACTTTCTAAACAC-3'	5'-GAGTGCCTAATTCTTCACCATAAGC-3'
217	14	PRKG1	32	5'-GGCATGAACATTCGTCAAATCTC-3'	5'-AGACAGCTGCAATCTCACTAAAGC-3'
Control	15	GCG	-	5'-AACATTGCCAAACGTCACGATG-3'	5'-GCCTTCCTCGGCCTTTCA-3'
