# Supplementary material for: A global analysis of CNVs in swine using whole genome sequence data and association analysis with fatty acid composition and growth traits
Source: PLoS One. 2017 May 4;12(5):e0177014. doi: 10.1371/journal.pone.0177014 (PMC5417718; doi:10.1371/journal.pone.0177014)
Supplement: S2 Table — (XLSX) [file pone.0177014.s006.xlsx]

## Sheet: S2_Table
S2 Table. Duplication and deletion calls predicted by Control-FREEC software from all 7 pigs.
Chr.	Start	End	Size (kb)	Copy number	Status	Wilcoxon Rank Sum Test Pvalue	Kolmogorov Smirnov Pvalue	p-value	Sample
1	4171226	4191590	20.364	3	gain	0.00272528	0.00500973	0.00272528	Ib1
1	6177080	6180474	3.394	0	loss	0.0832684	0.270041	0.0832684	Ib1
1	31862872	31866266	3.394	1	loss	0.0832722	0.270047	0.0832722	Ib1
1	32870890	32874284	3.394	1	loss	0.0832684	0.270041	0.0832684	Ib1
1	85111338	85114732	3.394	1	loss	0.0832761	0.270054	0.0832761	Ib1
1	90599436	90629982	30.546	1	loss	0.00270085	0.00495955	0.00270085	Ib1
1	90697862	91705880	1008.02	1	loss	9.81356e-72	0	9.81356e-72	Ib1
1	133903482	133937422	33.94	4	gain	0.000533305	0.000672271	0.000533305	Ib1
1	140762756	140769544	6.788	1	loss	0.0143657	0.0368076	0.0143657	Ib1
1	142290056	142293450	3.394	3	gain	0.0833921	0.270256	0.0833921	Ib1
1	192514468	192541620	27.152	1	loss	0.000120167	0.000128228	0.000120167	Ib1
1	205605126	205615308	10.182	4	gain	0.0143223	0.0366586	0.0143223	Ib1
1	232336270	232339664	3.394	1	loss	0.0832684	0.270041	0.0832684	Ib1
1	260557380	260560774	3.394	1	loss	0.0832684	0.270041	0.0832684	Ib1
1	270831018	270834412	3.394	1	loss	0.0832684	0.270041	0.0832684	Ib1
1	281949762	281953156	3.394	4	gain	0.0833379	0.270162	0.0833379	Ib1
1	291419022	291422416	3.394	0	loss	0.0832684	0.270041	0.0832684	Ib1
1	294992904	294996298	3.394	4	gain	0.0833534	0.270188	0.0833534	Ib1
1	295244060	295250848	6.788	4	gain	0.0143309	0.0366733	0.0143309	Ib1
1	295488428	295491822	3.394	3	gain	0.0833959	0.270262	0.0833959	Ib1
1	308969396	308972790	3.394	3	gain	0.0834037	0.270276	0.0834037	Ib1
1	313048984	313052378	3.394	5	gain	0.0832993	0.270094	0.0832993	Ib1
1	313065954	313079530	13.576	6	gain	0.000532403	0.000671463	0.000532403	Ib1
2	8698822	8702216	3.394	4	gain	0.0833225	0.270135	0.0833225	Ib1
2	11651602	11654996	3.394	4	gain	0.0833379	0.270162	0.0833379	Ib1
2	11756816	11760210	3.394	8	gain	0.0832761	0.270054	0.0832761	Ib1
2	12065670	12069064	3.394	3	gain	0.0833921	0.270256	0.0833921	Ib1
2	13844126	13847520	3.394	3	gain	0.0833921	0.270256	0.0833921	Ib1
2	14007038	14061342	54.304	5	gain	0.000107816	9.10789e-05	0.000107816	Ib1
2	14061342	14784264	722.922	4	gain	0.0833534	0.270188	0.0833534	Ib1
2	14913236	14953964	40.728	5	gain	0.000532768	0.000671665	0.000532768	Ib1
2	15001480	15004874	3.394	11	gain	0.0832684	0.270041	0.0832684	Ib1
2	15120270	15140634	20.364	6	gain	0.00270252	0.00496105	0.00270252	Ib1
2	15147422	15154210	6.788	5	gain	0.0143193	0.0366531	0.0143193	Ib1
2	15201726	15205120	3.394	6	gain	0.08328	0.270061	0.08328	Ib1
2	15205120	15507186	302.066	4	gain	2.04717e-07	3.06425e-08	2.04717e-07	Ib1
2	24654016	24664198	10.182	1	loss	0.00270063	0.00495955	0.00270063	Ib1
2	38342018	38358988	16.97	1	loss	0.00276859	0.0051457	0.00276859	Ib1
2	53669322	53696474	27.152	4	gain	2.21744e-05	1.23254e-05	2.21744e-05	Ib1
2	55634448	55651418	16.97	4	gain	0.00270786	0.00496888	0.00270786	Ib1
2	55681964	55858452	176.488	3	gain	2.31386e-07	6.01729e-08	2.31386e-07	Ib1
2	57025988	57029382	3.394	0	loss	0.0832684	0.270041	0.0832684	Ib1
2	57674242	57677636	3.394	4	gain	0.0833341	0.270155	0.0833341	Ib1
2	61349944	61356732	6.788	3	gain	0.0143498	0.0366972	0.0143498	Ib1
2	62615906	62649846	33.94	6	gain	0.000107691	9.09194e-05	0.000107691	Ib1
2	62833122	62836516	3.394	4	gain	0.0833534	0.270188	0.0833534	Ib1
2	64604790	64608184	3.394	4	gain	0.0833534	0.270188	0.0833534	Ib1
2	109344498	109347892	3.394	1	loss	0.0832684	0.270041	0.0832684	Ib1
2	110712280	110715674	3.394	1	loss	0.0832722	0.270047	0.0832722	Ib1
2	114781686	114808838	27.152	1	loss	2.21919e-05	1.24764e-05	2.21919e-05	Ib1
2	116302198	116308986	6.788	1	loss	0.0143095	0.0366384	0.0143095	Ib1
2	126714990	126721778	6.788	1	loss	0.0143077	0.0366347	0.0143077	Ib1
2	158550710	158611802	61.092	3	gain	0.0129154	0.0016822	0.0129154	Ib1
2	158615196	158645742	30.546	4	gain	0.0027053	0.00496478	0.0027053	Ib1
2	158652530	158666106	13.576	3	gain	0.00892416	0.0398331	0.00892416	Ib1
2	159507818	159511212	3.394	1	loss	0.0832684	0.270041	0.0832684	Ib1
2	160240922	160244316	3.394	4	gain	0.0833109	0.270115	0.0833109	Ib1
2	160407228	160410622	3.394	5	gain	0.0833032	0.270101	0.0833032	Ib1
2	160417410	160583716	166.306	4	gain	9.20555e-11	1.39511e-12	9.20555e-11	Ib1
2	161503490	161517066	13.576	4	gain	0.014326	0.0366659	0.014326	Ib1
2	161724100	161730888	6.788	3	gain	0.0143358	0.0366788	0.0143358	Ib1
2	161856466	161873436	16.97	3	gain	0.00271287	0.00497411	0.00271287	Ib1
3	45374386	45381174	6.788	10	gain	0.0143071	0.0366329	0.0143071	Ib1
3	64631942	64635336	3.394	1	loss	0.08328	0.270061	0.08328	Ib1
3	95310308	95327278	16.97	1	loss	0.000107575	9.08738e-05	0.000107575	Ib1
3	100326640	100384338	57.698	4	gain	9.68617e-07	2.2602e-07	9.68617e-07	Ib1
3	101110654	101117442	6.788	1	loss	0.0143077	0.0366347	0.0143077	Ib1
3	113515724	113539482	23.758	3	gain	0.00271454	0.00497935	0.00271454	Ib1
3	132423698	132427092	3.394	1	loss	0.0832684	0.270041	0.0832684	Ib1
3	139109878	139113272	3.394	1	loss	0.0832684	0.270041	0.0832684	Ib1
3	144390942	144428276	37.334	0	loss	2.21001e-05	1.2294e-05	2.21001e-05	Ib1
4	4622628	4626022	3.394	1	loss	0.0832722	0.270047	0.0832722	Ib1
4	52593424	52596818	3.394	1	loss	0.0832722	0.270047	0.0832722	Ib1
4	56778226	56785014	6.788	1	loss	0.0143156	0.0366586	0.0143156	Ib1
4	59493426	59496820	3.394	1	loss	0.08328	0.270061	0.08328	Ib1
4	72163228	72285412	122.184	0	loss	9.52402e-15	0	9.52402e-15	Ib1
4	77108286	77142226	33.94	0	loss	2.21001e-05	1.2294e-05	2.21001e-05	Ib1
4	96895306	96898700	3.394	3	gain	0.0833843	0.270242	0.0833843	Ib1
4	99461170	99464564	3.394	4	gain	0.0833109	0.270115	0.0833109	Ib1
4	108720002	108723396	3.394	4	gain	0.0833341	0.270155	0.0833341	Ib1
4	111408050	111411444	3.394	4	gain	0.0833263	0.270141	0.0833263	Ib1
4	124695560	124698954	3.394	1	loss	0.0832684	0.270041	0.0832684	Ib1
4	141977808	142127144	149.336	5	gain	1.98436e-09	7.58668e-11	1.98436e-09	Ib1
5	21246440	21276986	30.546	4	gain	0.000533456	0.000672743	0.000533456	Ib1
5	22189972	22203548	13.576	5	gain	0.0143193	0.0366531	0.0143193	Ib1
5	22441128	22444522	3.394	3	gain	0.083423	0.270309	0.083423	Ib1
5	47828248	47831642	3.394	0	loss	0.0832684	0.270041	0.0832684	Ib1
5	66016694	66020088	3.394	5	gain	0.083307	0.270108	0.083307	Ib1
5	66030270	66043846	13.576	8	gain	0.0143095	0.0366366	0.0143095	Ib1
5	66050634	66054028	3.394	6	gain	0.0832916	0.270081	0.0832916	Ib1
5	94455020	94458414	3.394	5	gain	0.0832993	0.270094	0.0832993	Ib1
5	107695014	107698408	3.394	1	loss	0.0832684	0.270041	0.0832684	Ib1
6	13576	16970	3.394	3	gain	0.0833843	0.270242	0.0833843	Ib1
6	95032	98426	3.394	7	gain	0.0832761	0.270054	0.0832761	Ib1
6	1697000	1700394	3.394	0	loss	0.0832684	0.270041	0.0832684	Ib1
6	12062276	12065670	3.394	1	loss	0.0833147	0.270121	0.0833147	Ib1
6	21056376	21059770	3.394	1	loss	0.0832684	0.270041	0.0832684	Ib1
6	22312156	22315550	3.394	1	loss	0.0833147	0.270121	0.0833147	Ib1
6	42241724	42245118	3.394	4	gain	0.0833341	0.270155	0.0833341	Ib1
6	44967106	44970500	3.394	5	gain	0.0833032	0.270101	0.0833032	Ib1
6	107515132	107623740	108.608	0	loss	2.16434e-17	0	2.16434e-17	Ib1
6	118172292	118175686	3.394	1	loss	0.0833225	0.270135	0.0833225	Ib1
6	118616906	118630482	13.576	1	loss	0.00270041	0.00495844	0.00270041	Ib1
6	131914598	131917992	3.394	1	loss	0.0832916	0.270081	0.0832916	Ib1
6	154508456	154535608	27.152	3	gain	2.2321e-05	1.24726e-05	2.2321e-05	Ib1
7	19267738	19271132	3.394	1	loss	0.0833379	0.270162	0.0833379	Ib1
7	23985398	23988792	3.394	1	loss	0.0832722	0.270047	0.0832722	Ib1
7	25380332	25393908	13.576	4	gain	0.0143242	0.0366641	0.0143242	Ib1
7	25763854	25770642	6.788	5	gain	0.0143181	0.0366512	0.0143181	Ib1
7	26496958	26500352	3.394	15	gain	0.0832684	0.270041	0.0832684	Ib1
7	26578414	26581808	3.394	10	gain	0.0832684	0.270041	0.0832684	Ib1
7	28411174	28414568	3.394	1	loss	0.0832722	0.270047	0.0832722	Ib1
7	84211928	84222110	10.182	3	gain	0.00270897	0.00497411	0.00270897	Ib1
7	95622556	95625950	3.394	1	loss	0.0833302	0.270148	0.0833302	Ib1
7	125927582	125930976	3.394	1	loss	0.083307	0.270108	0.083307	Ib1
8	14353226	14356620	3.394	1	loss	0.083365	0.270209	0.083365	Ib1
8	22430946	22434340	3.394	1	loss	0.0832838	0.270068	0.0832838	Ib1
8	31598140	31601534	3.394	1	loss	0.0832838	0.270068	0.0832838	Ib1
8	55203410	55206804	3.394	1	loss	0.0832722	0.270047	0.0832722	Ib1
8	56157124	56160518	3.394	3	gain	0.0834385	0.270336	0.0834385	Ib1
8	62374932	62381720	6.788	1	loss	0.0145255	0.0372132	0.0145255	Ib1
8	94634902	94638296	3.394	0	loss	0.0832684	0.270041	0.0832684	Ib1
8	97815080	97818474	3.394	1	loss	0.0832684	0.270041	0.0832684	Ib1
8	103676518	103679912	3.394	1	loss	0.0833147	0.270121	0.0833147	Ib1
8	108781094	108784488	3.394	1	loss	0.0832722	0.270047	0.0832722	Ib1
8	112212428	112215822	3.394	1	loss	0.0832684	0.270041	0.0832684	Ib1
8	114975144	114978538	3.394	1	loss	0.0833882	0.270249	0.0833882	Ib1
8	124712530	124719318	6.788	1	loss	0.014446	0.037022	0.014446	Ib1
8	138756902	138760296	3.394	1	loss	0.0833302	0.270148	0.0833302	Ib1
9	3719824	3723218	3.394	4	gain	0.0833225	0.270135	0.0833225	Ib1
9	5152092	5172456	20.364	4	gain	0.00270608	0.00496589	0.00270608	Ib1
9	5179244	5348944	169.7	4	gain	4.22483e-11	1.24378e-12	4.22483e-11	Ib1
9	11128926	11132320	3.394	5	gain	0.0833032	0.270101	0.0833032	Ib1
9	19912598	19915992	3.394	3	gain	0.0834037	0.270276	0.0834037	Ib1
9	38521900	38525294	3.394	3	gain	0.0833882	0.270249	0.0833882	Ib1
9	49012754	49016148	3.394	1	loss	0.0832838	0.270068	0.0832838	Ib1
9	52338874	52342268	3.394	1	loss	0.08328	0.270061	0.08328	Ib1
9	56781620	56785014	3.394	3	gain	0.0833882	0.270249	0.0833882	Ib1
9	56968290	56975078	6.788	3	gain	0.0143596	0.0367156	0.0143596	Ib1
9	78510008	78513402	3.394	3	gain	0.0834037	0.270276	0.0834037	Ib1
9	81808976	81812370	3.394	1	loss	0.083307	0.270108	0.083307	Ib1
9	115199148	115212724	13.576	1	loss	0.0143089	0.0366366	0.0143089	Ib1
9	115928858	115932252	3.394	1	loss	0.08328	0.270061	0.08328	Ib1
9	125045142	125048536	3.394	1	loss	0.0832722	0.270047	0.0832722	Ib1
9	125527090	125530484	3.394	4	gain	0.0833573	0.270195	0.0833573	Ib1
9	149312242	149315636	3.394	1	loss	0.0832838	0.270068	0.0832838	Ib1
10	481948	485342	3.394	4	gain	0.0833457	0.270175	0.0833457	Ib1
10	9374228	9377622	3.394	1	loss	0.0832684	0.270041	0.0832684	Ib1
10	10073392	10080180	6.788	1	loss	0.014611	0.037542	0.014611	Ib1
10	14339650	14343044	3.394	1	loss	0.0832722	0.270047	0.0832722	Ib1
10	23459328	23500056	40.728	3	gain	3.736e-05	7.01358e-05	3.736e-05	Ib1
10	23554360	23656180	101.82	3	gain	1.01829e-06	2.57037e-07	1.01829e-06	Ib1
10	23737636	23771576	33.94	3	gain	2.76549e-05	6.93608e-05	2.76549e-05	Ib1
10	23774970	23778364	3.394	3	gain	0.0833843	0.270242	0.0833843	Ib1
10	46623378	46626772	3.394	7	gain	0.0832761	0.270054	0.0832761	Ib1
10	46630166	46633560	3.394	3	gain	0.0834346	0.270329	0.0834346	Ib1
10	57124414	57141384	16.97	3	gain	0.00271075	0.0049715	0.00271075	Ib1
10	68239764	68412858	173.094	3	gain	2.04704e-13	4.44089e-16	2.04704e-13	Ib1
10	76904646	76908040	3.394	9	gain	0.0832684	0.270041	0.0832684	Ib1
11	10609644	10616432	6.788	1	loss	0.014901	0.0383962	0.014901	Ib1
11	24596318	24599712	3.394	1	loss	0.0832722	0.270047	0.0832722	Ib1
11	38525294	38532082	6.788	1	loss	0.0143077	0.0366347	0.0143077	Ib1
11	39760710	39764104	3.394	3	gain	0.0834153	0.270296	0.0834153	Ib1
11	51256188	51259582	3.394	1	loss	0.0833032	0.270101	0.0833032	Ib1
11	57185506	57192294	6.788	0	loss	0.0143071	0.0366329	0.0143071	Ib1
11	69061112	69064506	3.394	1	loss	0.0833147	0.270121	0.0833147	Ib1
11	82847540	82857722	10.182	1	loss	0.0144123	0.036898	0.0144123	Ib1
12	20231634	20235028	3.394	3	gain	0.0834346	0.270329	0.0834346	Ib1
12	51249400	51252794	3.394	3	gain	0.0833882	0.270249	0.0833882	Ib1
13	1269356	1310084	40.728	1	loss	0.000533305	0.000674565	0.000533305	Ib1
13	13005808	13009202	3.394	1	loss	0.0832684	0.270041	0.0832684	Ib1
13	38715358	38718752	3.394	1	loss	0.0832684	0.270041	0.0832684	Ib1
13	44128788	44132182	3.394	3	gain	0.0833766	0.270229	0.0833766	Ib1
13	54663764	54667158	3.394	1	loss	0.0832916	0.270081	0.0832916	Ib1
13	57158354	57161748	3.394	3	gain	0.0833921	0.270256	0.0833921	Ib1
13	80125552	80128946	3.394	1	loss	0.0832761	0.270054	0.0832761	Ib1
13	114075734	114079128	3.394	1	loss	0.0832684	0.270041	0.0832684	Ib1
13	128415384	128418778	3.394	1	loss	0.0832761	0.270054	0.0832761	Ib1
13	141241310	141254886	13.576	3	gain	0.0143462	0.0366917	0.0143462	Ib1
13	151823802	151830590	6.788	4	gain	0.0143339	0.0366972	0.0143339	Ib1
13	172581506	172584900	3.394	5	gain	0.0832993	0.270094	0.0832993	Ib1
13	172601870	172608658	6.788	5	gain	0.0143236	0.0366733	0.0143236	Ib1
13	176379392	176382786	3.394	1	loss	0.0833225	0.270135	0.0833225	Ib1
13	183031632	183035026	3.394	1	loss	0.0833379	0.270162	0.0833379	Ib1
13	183669704	183676492	6.788	3	gain	0.0143535	0.0367174	0.0143535	Ib1
13	203351510	203358298	6.788	1	loss	0.0144202	0.0368703	0.0144202	Ib1
14	1832760	1836154	3.394	4	gain	0.0833573	0.270195	0.0833573	Ib1
14	16878362	16881756	3.394	1	loss	0.0832722	0.270047	0.0832722	Ib1
14	20027994	20031388	3.394	1	loss	0.0832684	0.270041	0.0832684	Ib1
14	23778364	23781758	3.394	4	gain	0.0833341	0.270155	0.0833341	Ib1
14	36125736	36129130	3.394	1	loss	0.0832722	0.270047	0.0832722	Ib1
14	38579598	38582992	3.394	4	gain	0.0833147	0.270121	0.0833147	Ib1
14	38688206	38691600	3.394	4	gain	0.0833109	0.270115	0.0833109	Ib1
14	55895786	55899180	3.394	1	loss	0.0832761	0.270054	0.0832761	Ib1
14	74620484	74623878	3.394	0	loss	0.0832684	0.270041	0.0832684	Ib1
14	100974894	100978288	3.394	3	gain	0.0833959	0.270262	0.0833959	Ib1
14	103126690	103130084	3.394	0	loss	0.0832684	0.270041	0.0832684	Ib1
14	116190196	116193590	3.394	1	loss	0.0832722	0.270047	0.0832722	Ib1
14	116288622	116292016	3.394	4	gain	0.0833534	0.270188	0.0833534	Ib1
14	125258964	125262358	3.394	1	loss	0.0832761	0.270054	0.0832761	Ib1
14	149794190	149797584	3.394	1	loss	0.0832684	0.270041	0.0832684	Ib1
15	16542356	16545750	3.394	1	loss	0.0833225	0.270135	0.0833225	Ib1
15	18490512	18493906	3.394	4	gain	0.0833263	0.270141	0.0833263	Ib1
15	19104826	19108220	3.394	1	loss	0.0833225	0.270135	0.0833225	Ib1
15	37086238	37089632	3.394	1	loss	0.0832722	0.270047	0.0832722	Ib1
15	51751712	51755106	3.394	1	loss	0.0833534	0.270188	0.0833534	Ib1
15	56632284	56649254	16.97	0	loss	0.000107545	9.08283e-05	0.000107545	Ib1
15	79884578	79887972	3.394	1	loss	0.0832761	0.270054	0.0832761	Ib1
15	106737906	106741300	3.394	1	loss	0.0832916	0.270081	0.0832916	Ib1
15	149285090	149288484	3.394	1	loss	0.0832916	0.270081	0.0832916	Ib1
15	156734920	156738314	3.394	1	loss	0.0832722	0.270047	0.0832722	Ib1
15	157437478	157440872	3.394	4	gain	0.0833534	0.270188	0.0833534	Ib1
16	1103050	1113232	10.182	0	loss	0.00270218	0.00496478	0.00270218	Ib1
16	6635270	6648846	13.576	3	gain	0.0143547	0.0367119	0.0143547	Ib1
16	7605954	7609348	3.394	3	gain	0.0833921	0.270256	0.0833921	Ib1
16	7677228	7680622	3.394	3	gain	0.083365	0.270209	0.083365	Ib1
16	16060408	16063802	3.394	1	loss	0.0832684	0.270041	0.0832684	Ib1
16	27348852	27352246	3.394	1	loss	0.083307	0.270108	0.083307	Ib1
16	30196418	30206600	10.182	1	loss	0.00270063	0.00495918	0.00270063	Ib1
16	51996080	51999474	3.394	1	loss	0.0832684	0.270041	0.0832684	Ib1
16	76724764	76728158	3.394	1	loss	0.0833302	0.270148	0.0833302	Ib1
17	3696066	3699460	3.394	1	loss	0.0833573	0.270195	0.0833573	Ib1
17	11003348	11006742	3.394	3	gain	0.0833843	0.270242	0.0833843	Ib1
17	14495774	14499168	3.394	5	gain	0.0833109	0.270115	0.0833109	Ib1
17	16993758	16997152	3.394	1	loss	0.0832722	0.270047	0.0832722	Ib1
17	54867404	54877586	10.182	0	loss	0.0143071	0.0366329	0.0143071	Ib1
17	67527024	67530418	3.394	6	gain	0.0832954	0.270088	0.0832954	Ib1
17	67533812	67537206	3.394	7	gain	0.0832761	0.270054	0.0832761	Ib1
17	67537206	67540600	3.394	5	gain	0.0833032	0.270101	0.0833032	Ib1
17	67540600	67547388	6.788	4	gain	0.0143272	0.0366733	0.0143272	Ib1
17	67547388	67550782	3.394	6	gain	0.0832954	0.270088	0.0832954	Ib1
17	67632238	67645814	13.576	6	gain	0.0143162	0.0366476	0.0143162	Ib1
17	67666178	67672966	6.788	5	gain	0.0143254	0.0366733	0.0143254	Ib1
18	23167444	23170838	3.394	1	loss	0.0833843	0.270242	0.0833843	Ib1
18	44329034	44332428	3.394	1	loss	0.0832722	0.270047	0.0832722	Ib1
1	6176787	6180124	3.337	0	loss	0.0832683	0.270041	0.0832683	Ib2
1	31861676	31865013	3.337	0	loss	0.0832683	0.270041	0.0832683	Ib2
1	90599550	91704097	1104.55	1	loss	2.97408e-78	0	2.97408e-78	Ib2
1	133907136	133937169	30.033	4	gain	0.00270811	0.00496753	0.00270811	Ib2
1	192514867	192541563	26.696	1	loss	0.000231719	0.000920549	0.000231719	Ib2
1	205605918	205615929	10.011	4	gain	0.0143363	0.0366831	0.0143363	Ib2
1	232335288	232338625	3.337	1	loss	0.0832683	0.270041	0.0832683	Ib2
1	242516475	242519812	3.337	0	loss	0.0832683	0.270041	0.0832683	Ib2
1	260556297	260562971	6.674	1	loss	0.0143369	0.0367227	0.0143369	Ib2
1	281949804	281953141	3.337	4	gain	0.0833476	0.270178	0.0833476	Ib2
1	294994137	294997474	3.337	4	gain	0.0833703	0.270218	0.0833703	Ib2
1	295244412	295251086	6.674	4	gain	0.0143351	0.0366795	0.0143351	Ib2
1	295781669	295785006	3.337	4	gain	0.0833665	0.270211	0.0833665	Ib2
1	312183024	313013937	830.913	4	gain	4.29845e-10	1.03376e-11	4.29845e-10	Ib2
1	313067329	313084014	16.685	7	gain	0.000532814	0.000671846	0.000532814	Ib2
1	313084014	315321322	2237.31	4	gain	0.682834	0.905569	0.682834	Ib2
2	11439236	11442573	3.337	8	gain	0.0832872	0.270074	0.0832872	Ib2
2	11459258	11462595	3.337	4	gain	0.0833476	0.270178	0.0833476	Ib2
2	11756251	11759588	3.337	7	gain	0.0832947	0.270087	0.0832947	Ib2
2	14913053	15366885	453.832	5	gain	9.28002e-09	5.61739e-10	9.28002e-09	Ib2
2	15366885	15507039	140.154	4	gain	4.36571e-08	4.16901e-09	4.36571e-08	Ib2
2	24410155	24416829	6.674	1	loss	0.0143106	0.03664	0.0143106	Ib2
2	53668971	53695667	26.696	4	gain	0.00010804	9.11285e-05	0.00010804	Ib2
2	55634464	55677845	43.381	4	gain	0.000108208	9.12513e-05	0.000108208	Ib2
2	55681182	55717889	36.707	3	gain	0.00188079	0.000874908	0.00188079	Ib2
2	57025993	57029330	3.337	0	loss	0.0832683	0.270041	0.0832683	Ib2
2	57673371	57676708	3.337	4	gain	0.0833439	0.270172	0.0833439	Ib2
2	62615468	62652175	36.707	5	gain	0.000107826	9.10169e-05	0.000107826	Ib2
2	62832373	62839047	6.674	3	gain	0.0143494	0.0367029	0.0143494	Ib2
2	64604320	64607657	3.337	4	gain	0.0833703	0.270218	0.0833703	Ib2
2	68114844	68118181	3.337	6	gain	0.0833023	0.2701	0.0833023	Ib2
2	109343479	109346816	3.337	0	loss	0.0832683	0.270041	0.0832683	Ib2
2	114782789	114802811	20.022	1	loss	0.000107578	9.08722e-05	0.000107578	Ib2
2	116301124	116311135	10.011	1	loss	0.002703	0.00496279	0.002703	Ib2
2	159508600	159511937	3.337	1	loss	0.0832796	0.27006	0.0832796	Ib2
2	160239403	160246077	6.674	4	gain	0.0143333	0.0366759	0.0143333	Ib2
2	160409590	160412927	3.337	4	gain	0.0833439	0.270172	0.0833439	Ib2
2	160516374	160583114	66.74	4	gain	9.3243e-09	5.62951e-10	9.3243e-09	Ib2
2	161504126	161517474	13.348	4	gain	0.0143405	0.0366867	0.0143405	Ib2
2	161724368	161731042	6.674	3	gain	0.0143494	0.0367029	0.0143494	Ib2
3	22317856	22321193	3.337	6	gain	0.0833174	0.270126	0.0833174	Ib2
3	45373189	45379863	6.674	9	gain	0.0143118	0.03664	0.0143118	Ib2
3	95311394	95328079	16.685	1	loss	0.000532352	0.000671583	0.000532352	Ib2
3	100326905	100383634	56.729	4	gain	9.71386e-07	2.26486e-07	9.71386e-07	Ib2
3	101111100	101114437	3.337	0	loss	0.0832683	0.270041	0.0832683	Ib2
3	113528077	113554773	26.696	3	gain	0.000109457	9.3067e-05	0.000109457	Ib2
3	132422171	132425508	3.337	1	loss	0.0832683	0.270041	0.0832683	Ib2
3	139109519	139112856	3.337	1	loss	0.0832683	0.270041	0.0832683	Ib2
3	144375305	144787322	412.017	0	loss	0.00269898	2.74464e-06	0.00269898	Ib2
4	9804106	9807443	3.337	1	loss	0.0832683	0.270041	0.0832683	Ib2
4	15703922	15707259	3.337	1	loss	0.0832985	0.270093	0.0832985	Ib2
4	50996034	50999371	3.337	4	gain	0.0833703	0.270218	0.0833703	Ib2
4	56779055	56782392	3.337	1	loss	0.0832683	0.270041	0.0832683	Ib2
4	72162625	72286094	123.469	0	loss	4.53063e-16	0	4.53063e-16	Ib2
4	77108059	77144766	36.707	0	loss	4.59539e-06	1.66406e-06	4.59539e-06	Ib2
4	81776522	81783196	6.674	1	loss	0.0143178	0.0366652	0.0143178	Ib2
4	96896469	96899806	3.337	4	gain	0.0833628	0.270205	0.0833628	Ib2
4	108719460	108722797	3.337	4	gain	0.0833628	0.270205	0.0833628	Ib2
4	108899658	108902995	3.337	4	gain	0.0833665	0.270211	0.0833665	Ib2
4	111409082	111419093	10.011	4	gain	0.0143363	0.0366831	0.0143363	Ib2
4	122955102	122958439	3.337	1	loss	0.0833098	0.270113	0.0833098	Ib2
4	124697016	124700353	3.337	1	loss	0.0832721	0.270047	0.0832721	Ib2
4	141996024	142002698	6.674	6	gain	0.014322	0.0366562	0.014322	Ib2
4	142006035	142009372	3.337	6	gain	0.0832985	0.270093	0.0832985	Ib2
4	142012709	142032731	20.022	6	gain	0.00270409	0.00496242	0.00270409	Ib2
4	142089460	142096134	6.674	6	gain	0.014319	0.0366544	0.014319	Ib2
4	142119493	142126167	6.674	6	gain	0.014319	0.0366544	0.014319	Ib2
5	21246679	21276712	30.033	4	gain	0.000533802	0.000672834	0.000533802	Ib2
5	21974145	21977482	3.337	6	gain	0.0833136	0.270119	0.0833136	Ib2
5	21990830	21994167	3.337	8	gain	0.0832947	0.270087	0.0832947	Ib2
5	22017526	22020863	3.337	6	gain	0.0833136	0.270119	0.0833136	Ib2
5	22441325	22444662	3.337	3	gain	0.0834422	0.270343	0.0834422	Ib2
5	47832558	47835895	3.337	0	loss	0.0832683	0.270041	0.0832683	Ib2
5	66019208	66045904	26.696	7	gain	0.00270235	0.00496097	0.00270235	Ib2
5	77755437	77758774	3.337	3	gain	0.0834233	0.27031	0.0834233	Ib2
5	94457122	94460459	3.337	4	gain	0.0833476	0.270178	0.0833476	Ib2
6	13348	16685	3.337	3	gain	0.0835747	0.270572	0.0835747	Ib2
6	12063255	12066592	3.337	1	loss	0.0832683	0.270041	0.0832683	Ib2
6	21056470	21059807	3.337	1	loss	0.0832683	0.270041	0.0832683	Ib2
6	44956064	44959401	3.337	6	gain	0.0833136	0.270119	0.0833136	Ib2
6	45383200	45386537	3.337	5	gain	0.0833325	0.270152	0.0833325	Ib2
6	80708682	80722030	13.348	3	gain	0.0017941	0.0113317	0.0017941	Ib2
6	91513888	91517225	3.337	1	loss	0.0832834	0.270067	0.0832834	Ib2
6	107514803	107624924	110.121	0	loss	4.73578e-18	0	4.73578e-18	Ib2
6	118617002	118630350	13.348	1	loss	0.00270311	0.00496352	0.00270311	Ib2
6	154463056	154536470	73.414	3	gain	1.67117e-05	0.000161498	1.67117e-05	Ib2
7	25971871	25975208	3.337	4	gain	0.0833703	0.270218	0.0833703	Ib2
7	82260387	82263724	3.337	3	gain	0.0833892	0.270251	0.0833892	Ib2
7	84212532	84215869	3.337	4	gain	0.083359	0.270198	0.083359	Ib2
7	84219206	84222543	3.337	3	gain	0.0835936	0.270605	0.0835936	Ib2
7	92955472	92958809	3.337	1	loss	0.0832834	0.270067	0.0832834	Ib2
7	102782937	102786274	3.337	4	gain	0.0833741	0.270224	0.0833741	Ib2
7	125928369	125931706	3.337	1	loss	0.0832683	0.270041	0.0832683	Ib2
8	55203991	55207328	3.337	1	loss	0.0832758	0.270054	0.0832758	Ib2
8	70574213	70577550	3.337	8	gain	0.0832872	0.270074	0.0832872	Ib2
8	70587561	70590898	3.337	12	gain	0.0832721	0.270047	0.0832721	Ib2
8	97814144	97820818	6.674	1	loss	0.0144742	0.0371293	0.0144742	Ib2
8	108779526	108782863	3.337	0	loss	0.0832683	0.270041	0.0832683	Ib2
8	112209962	112213299	3.337	0	loss	0.0832683	0.270041	0.0832683	Ib2
8	114972998	114976335	3.337	1	loss	0.0832683	0.270041	0.0832683	Ib2
8	138755797	138759134	3.337	1	loss	0.0832721	0.270047	0.0832721	Ib2
9	3717418	3724092	6.674	4	gain	0.0143309	0.0366795	0.0143309	Ib2
9	4268023	4271360	3.337	0	loss	0.0832683	0.270041	0.0832683	Ib2
9	5148991	5225742	76.751	4	gain	9.29029e-11	1.41065e-12	9.29029e-11	Ib2
9	5319178	5322515	3.337	3	gain	0.0835027	0.270448	0.0835027	Ib2
9	11128895	11132232	3.337	5	gain	0.0833363	0.270159	0.0833363	Ib2
9	78509599	78512936	3.337	4	gain	0.0833817	0.270238	0.0833817	Ib2
9	125044064	125047401	3.337	0	loss	0.0832683	0.270041	0.0832683	Ib2
10	14339089	14342426	3.337	1	loss	0.0832721	0.270047	0.0832721	Ib2
10	21366811	21370148	3.337	0	loss	0.0832683	0.270041	0.0832683	Ib2
10	22598164	22601501	3.337	13	gain	0.0832683	0.270041	0.0832683	Ib2
10	23492480	23655993	163.513	3	gain	4.30112e-09	3.41432e-08	4.30112e-09	Ib2
10	23739418	23779462	40.044	3	gain	4.09516e-05	0.000250877	4.09516e-05	Ib2
10	46621227	46624564	3.337	4	gain	0.0833703	0.270218	0.0833703	Ib2
10	57129440	57136114	6.674	3	gain	0.014353	0.0367065	0.014353	Ib2
10	66790055	66793392	3.337	1	loss	0.0833665	0.270211	0.0833665	Ib2
10	68241650	68415174	173.524	3	gain	9.46192e-13	3.55271e-15	9.46192e-13	Ib2
10	76904502	76907839	3.337	9	gain	0.0832834	0.270067	0.0832834	Ib2
11	1718555	1721892	3.337	1	loss	0.0833136	0.270119	0.0833136	Ib2
11	10318004	10321341	3.337	1	loss	0.0832721	0.270047	0.0832721	Ib2
11	19531461	19534798	3.337	1	loss	0.0834233	0.27031	0.0834233	Ib2
11	25090903	25094240	3.337	1	loss	0.0833174	0.270126	0.0833174	Ib2
11	30727096	30730433	3.337	1	loss	0.0833325	0.270152	0.0833325	Ib2
11	38525665	38532339	6.674	1	loss	0.01431	0.03664	0.01431	Ib2
11	38539013	38542350	3.337	3	gain	0.0836277	0.270664	0.0836277	Ib2
11	46020567	46023904	3.337	1	loss	0.0832683	0.270041	0.0832683	Ib2
11	47765818	47769155	3.337	1	loss	0.0832721	0.270047	0.0832721	Ib2
11	51256320	51259657	3.337	1	loss	0.0833476	0.270178	0.0833476	Ib2
11	57182832	57192843	10.011	0	loss	0.00270018	0.00495805	0.00270018	Ib2
11	57693393	57696730	3.337	1	loss	0.0833514	0.270185	0.0833514	Ib2
11	64137140	64140477	3.337	1	loss	0.0832985	0.270093	0.0832985	Ib2
11	82854373	82857710	3.337	1	loss	0.0833514	0.270185	0.0833514	Ib2
12	51249646	51252983	3.337	3	gain	0.0834043	0.270277	0.0834043	Ib2
13	13007626	13010963	3.337	1	loss	0.0832683	0.270041	0.0832683	Ib2
13	80124707	80128044	3.337	1	loss	0.0832721	0.270047	0.0832721	Ib2
13	114075345	114078682	3.337	1	loss	0.0832721	0.270047	0.0832721	Ib2
13	141245199	141255210	10.011	3	gain	0.0143542	0.0367047	0.0143542	Ib2
13	172579629	172586303	6.674	5	gain	0.0143309	0.0366813	0.0143309	Ib2
13	172602988	172609662	6.674	5	gain	0.014325	0.0366652	0.014325	Ib2
13	178352639	178355976	3.337	1	loss	0.0832721	0.270047	0.0832721	Ib2
13	183671817	183675154	3.337	4	gain	0.0833439	0.270172	0.0833439	Ib2
13	193976473	193979810	3.337	3	gain	0.0834195	0.270303	0.0834195	Ib2
14	8999889	9003226	3.337	1	loss	0.0833023	0.2701	0.0833023	Ib2
14	16878546	16881883	3.337	1	loss	0.0832834	0.270067	0.0832834	Ib2
14	21677152	21680489	3.337	3	gain	0.0834043	0.270277	0.0834043	Ib2
14	23776125	23779462	3.337	4	gain	0.0833628	0.270205	0.0833628	Ib2
14	38582394	38585731	3.337	4	gain	0.0833439	0.270172	0.0833439	Ib2
14	38689178	38692515	3.337	4	gain	0.0833665	0.270211	0.0833665	Ib2
14	49984923	49988260	3.337	1	loss	0.0833098	0.270113	0.0833098	Ib2
14	61894676	61898013	3.337	1	loss	0.0832683	0.270041	0.0832683	Ib2
14	74618657	74621994	3.337	0	loss	0.0832683	0.270041	0.0832683	Ib2
14	86751989	86755326	3.337	0	loss	0.0832683	0.270041	0.0832683	Ib2
14	98151181	98154518	3.337	1	loss	0.0832834	0.270067	0.0832834	Ib2
14	103126648	103129985	3.337	1	loss	0.0832834	0.270067	0.0832834	Ib2
14	116187666	116191003	3.337	1	loss	0.0834497	0.270356	0.0834497	Ib2
14	116287776	116291113	3.337	4	gain	0.0833476	0.270178	0.0833476	Ib2
14	149791256	149797930	6.674	1	loss	0.0143602	0.0367857	0.0143602	Ib2
15	12153354	12156691	3.337	1	loss	0.0832985	0.270093	0.0832985	Ib2
15	18490317	18493654	3.337	4	gain	0.0833703	0.270218	0.0833703	Ib2
15	18537035	18540372	3.337	6	gain	0.0833136	0.270119	0.0833136	Ib2
15	37087418	37090755	3.337	1	loss	0.0832758	0.270054	0.0832758	Ib2
15	51750196	51753533	3.337	1	loss	0.0833476	0.270178	0.0833476	Ib2
15	56632227	56652249	20.022	0	loss	2.20999e-05	1.22938e-05	2.20999e-05	Ib2
15	79884443	79887780	3.337	1	loss	0.0833854	0.270244	0.0833854	Ib2
15	105359101	105362438	3.337	1	loss	0.083291	0.27008	0.083291	Ib2
15	155290632	155293969	3.337	63	gain	0.0832683	0.270041	0.0832683	Ib2
15	156735553	156738890	3.337	1	loss	0.0832683	0.270041	0.0832683	Ib2
16	1104547	1114558	10.011	0	loss	0.00270018	0.00495805	0.00270018	Ib2
16	2369270	2372607	3.337	1	loss	0.0832683	0.270041	0.0832683	Ib2
16	6143417	6146754	3.337	3	gain	0.0834724	0.270395	0.0834724	Ib2
16	7675100	7678437	3.337	3	gain	0.0834233	0.27031	0.0834233	Ib2
16	12323541	12326878	3.337	1	loss	0.0832683	0.270041	0.0832683	Ib2
16	30249905	30253242	3.337	3	gain	0.0834422	0.270343	0.0834422	Ib2
16	31541324	31544661	3.337	1	loss	0.0835974	0.270612	0.0835974	Ib2
16	32652545	32655882	3.337	0	loss	0.0832683	0.270041	0.0832683	Ib2
17	10995415	11002089	6.674	4	gain	0.0143399	0.0366831	0.0143399	Ib2
17	14495928	14499265	3.337	4	gain	0.0833439	0.270172	0.0833439	Ib2
17	54866954	54880302	13.348	0	loss	0.0143071	0.0366328	0.0143071	Ib2
17	56121666	56125003	3.337	4	gain	0.0833703	0.270218	0.0833703	Ib2
17	67527532	67530869	3.337	6	gain	0.0832985	0.270093	0.0832985	Ib2
17	67537543	67540880	3.337	6	gain	0.0833136	0.270119	0.0833136	Ib2
17	67540880	67544217	3.337	4	gain	0.0833665	0.270211	0.0833665	Ib2
17	67547554	67550891	3.337	6	gain	0.0832985	0.270093	0.0832985	Ib2
17	67630979	67637653	6.674	5	gain	0.0143226	0.0366562	0.0143226	Ib2
17	67644327	67647664	3.337	7	gain	0.0832985	0.270093	0.0832985	Ib2
17	67664349	67677697	13.348	4	gain	0.00270659	0.00496899	0.00270659	Ib2
18	22581479	22588153	6.674	1	loss	0.0143303	0.0367029	0.0143303	Ib2
18	23168791	23192150	23.359	1	loss	0.000885239	0.00173217	0.000885239	Ib2
18	45369852	45373189	3.337	1	loss	0.0836884	0.27077	0.0836884	Ib2
1	48174635	48181413	6.778	0	loss	0.0143076	0.0366345	0.0143076	Ld1
1	88215670	88219059	3.389	1	loss	0.0833049	0.270104	0.0833049	Ld1
1	95105507	95112285	6.778	3	gain	0.0144105	0.0368235	0.0144105	Ld1
1	133906168	133936669	30.501	4	gain	0.00271106	0.00497329	0.00271106	Ld1
1	140762115	140768893	6.778	1	loss	0.0143082	0.0366345	0.0143082	Ld1
1	242516840	242520229	3.389	0	loss	0.0832682	0.270041	0.0832682	Ld1
1	308985297	308988686	3.389	4	gain	0.0833674	0.270213	0.0833674	Ld1
1	313048708	313079209	30.501	7	gain	0.000532567	0.000671501	0.000532567	Ld1
2	11756441	11759830	3.389	7	gain	0.0832866	0.270073	0.0832866	Ld1
2	13766118	13769507	3.389	5	gain	0.0833123	0.270117	0.0833123	Ld1
2	14918378	14948879	30.501	6	gain	0.00270207	0.00496052	0.00270207	Ld1
2	15362337	15382671	20.334	4	gain	0.00271318	0.00498254	0.00271318	Ld1
2	15392838	15406394	13.556	6	gain	0.014314	0.036645	0.014314	Ld1
2	15477563	15504675	27.112	4	gain	0.00270841	0.00496761	0.00270841	Ld1
2	53674982	53695316	20.334	5	gain	0.000534244	0.000673872	0.000534244	Ld1
2	55399983	55410150	10.167	0	loss	0.00270017	0.00495804	0.00270017	Ld1
2	55627046	55860887	233.841	3	gain	8.62295e-07	2.01287e-07	8.62295e-07	Ld1
2	57674002	57677391	3.389	4	gain	0.0834263	0.270315	0.0834263	Ld1
2	62615164	62652443	37.279	7	gain	0.000107642	9.08918e-05	0.000107642	Ld1
2	62832060	62838838	6.778	4	gain	0.0143506	0.0367167	0.0143506	Ld1
2	68115511	68118900	3.389	6	gain	0.0832939	0.270085	0.0832939	Ld1
2	158615367	158645868	30.501	4	gain	0.00271244	0.00498076	0.00271244	Ld1
2	158652646	159025436	372.79	3	gain	0.000514516	0.000273269	0.000514516	Ld1
2	160242087	160245476	3.389	5	gain	0.0833454	0.270175	0.0833454	Ld1
2	160408148	160411537	3.389	5	gain	0.0833417	0.270168	0.0833417	Ld1
2	160418315	160431871	13.556	7	gain	0.0143128	0.036645	0.0143128	Ld1
2	160516596	160570820	54.224	4	gain	2.06128e-07	3.07849e-08	2.06128e-07	Ld1
2	161502795	161516351	13.556	4	gain	0.00271244	0.00497365	0.00271244	Ld1
3	45375321	45382099	6.778	11	gain	0.014307	0.0366328	0.014307	Ld1
3	100327956	100382180	54.224	3	gain	9.98743e-07	2.3618e-07	9.98743e-07	Ld1
3	144391734	144415457	23.723	3	gain	0.158678	0.010081	0.158678	Ld1
4	72165366	72287370	122.004	0	loss	4.53004e-16	0	4.53004e-16	Ld1
4	77106528	77140418	33.89	0	loss	0.000107544	9.08269e-05	0.000107544	Ld1
4	108712342	108722509	10.167	4	gain	0.014336	0.0366782	0.014336	Ld1
4	111409986	111420153	10.167	4	gain	0.0143343	0.0366799	0.0143343	Ld1
4	141944876	142127882	183.006	3	gain	2.28566e-11	3.12639e-13	2.28566e-11	Ld1
5	21991221	21994610	3.389	5	gain	0.0833013	0.270098	0.0833013	Ld1
5	26715487	26901882	186.395	1	loss	1.05385e-18	0	1.05385e-18	Ld1
5	33008860	33019027	10.167	4	gain	0.014336	0.0366799	0.014336	Ld1
5	33073251	33076640	3.389	4	gain	0.0833674	0.270213	0.0833674	Ld1
5	66017720	66021109	3.389	6	gain	0.0832902	0.270079	0.0832902	Ld1
5	66041443	66044832	3.389	9	gain	0.0832792	0.27006	0.0832792	Ld1
5	98250499	98257277	6.778	4	gain	0.0143616	0.0367499	0.0143616	Ld1
6	94892	98281	3.389	7	gain	0.0832866	0.270073	0.0832866	Ld1
6	42240496	42243885	3.389	4	gain	0.0834042	0.270277	0.0834042	Ld1
6	45382099	45385488	3.389	3	gain	0.083441	0.270341	0.083441	Ld1
6	95366460	95369849	3.389	1	loss	0.0832719	0.270047	0.0832719	Ld1
6	107516025	107624473	108.448	0	loss	4.53004e-16	0	4.53004e-16	Ld1
6	127090889	127097667	6.778	0	loss	0.0143128	0.0366503	0.0143128	Ld1
6	154490954	154535011	44.057	3	gain	2.9898e-05	2.71921e-05	2.9898e-05	Ld1
7	26576538	26583316	6.778	9	gain	0.0143111	0.0366398	0.0143111	Ld1
7	81749458	82166305	416.847	1	loss	8.33832e-16	2.55351e-15	8.33832e-16	Ld1
7	84213261	84233595	20.334	4	gain	0.00278401	0.0052226	0.00278401	Ld1
8	13152709	13156098	3.389	5	gain	0.0833417	0.270168	0.0833417	Ld1
8	43663876	43667265	3.389	5	gain	0.0833123	0.270117	0.0833123	Ld1
8	70579314	70582703	3.389	6	gain	0.0832902	0.270079	0.0832902	Ld1
8	95627413	95630802	3.389	0	loss	0.0832682	0.270041	0.0832682	Ld1
8	108780122	108783511	3.389	0	loss	0.0832682	0.270041	0.0832682	Ld1
8	112209790	112213179	3.389	0	loss	0.0832682	0.270041	0.0832682	Ld1
9	3717733	3724511	6.778	3	gain	0.0143651	0.0367376	0.0143651	Ld1
9	5154669	5347842	193.173	4	gain	2.05397e-13	4.44089e-16	2.05397e-13	Ld1
9	5561349	5568127	6.778	8	gain	0.0143117	0.0366415	0.0143117	Ld1
9	25617451	25620840	3.389	3	gain	0.0834336	0.270328	0.0834336	Ld1
9	57189375	57263933	74.558	1	loss	9.68537e-07	2.26447e-07	9.68537e-07	Ld1
10	481238	484627	3.389	7	gain	0.0832866	0.270073	0.0832866	Ld1
10	23462047	23523049	61.002	3	gain	2.25489e-05	0.000110628	2.25489e-05	Ld1
10	23739945	23780613	40.668	3	gain	7.45609e-06	4.31996e-06	7.45609e-06	Ld1
10	24373688	24383855	10.167	3	gain	0.00272562	0.00499252	0.00272562	Ld1
10	46622473	46625862	3.389	8	gain	0.0832829	0.270066	0.0832829	Ld1
10	68240904	68413743	172.839	3	gain	4.66227e-14	1.11022e-16	4.66227e-14	Ld1
10	76906577	76909966	3.389	9	gain	0.0832719	0.270047	0.0832719	Ld1
11	24970152	24976930	6.778	3	gain	0.0144415	0.0369253	0.0144415	Ld1
11	36018292	36021681	3.389	3	gain	0.0835035	0.270449	0.0835035	Ld1
11	57182597	57192764	10.167	0	loss	0.00270017	0.00495804	0.00270017	Ld1
12	30833122	30917847	84.725	1	loss	2.05132e-07	3.09835e-08	2.05132e-07	Ld1
13	6988118	6991507	3.389	0	loss	0.0832682	0.270041	0.0832682	Ld1
13	122220896	122237841	16.945	1	loss	0.000533487	0.000672846	0.000533487	Ld1
13	151823811	151827200	3.389	4	gain	0.0833784	0.270232	0.0833784	Ld1
13	170625983	170629372	3.389	1	loss	0.0832682	0.270041	0.0832682	Ld1
13	172581436	172584825	3.389	6	gain	0.0832939	0.270085	0.0832939	Ld1
13	172601770	172608548	6.778	5	gain	0.014332	0.0366957	0.014332	Ld1
14	38688824	38692213	3.389	3	gain	0.0834336	0.270328	0.0834336	Ld1
14	116188476	116191865	3.389	4	gain	0.0833564	0.270194	0.0833564	Ld1
15	18490384	18493773	3.389	5	gain	0.0833233	0.270136	0.0833233	Ld1
15	54600179	54603568	3.389	1	loss	0.0832792	0.27006	0.0832792	Ld1
15	56630190	56650524	20.334	0	loss	2.20996e-05	1.22937e-05	2.20996e-05	Ld1
15	56830141	56833530	3.389	1	loss	0.0832792	0.27006	0.0832792	Ld1
15	110183168	110206891	23.723	1	loss	0.000532853	0.000672077	0.000532853	Ld1
15	155290758	155294147	3.389	63	gain	0.0832682	0.270041	0.0832682	Ld1
16	7604916	7638806	33.89	3	gain	0.000124385	0.000110341	0.000124385	Ld1
16	7676085	7679474	3.389	5	gain	0.0833307	0.270149	0.0833307	Ld1
16	78431627	78438405	6.778	1	loss	0.014314	0.0366485	0.014314	Ld1
16	80231186	80234575	3.389	1	loss	0.0833013	0.270098	0.0833013	Ld1
17	10997305	11000694	3.389	3	gain	0.0834447	0.270347	0.0834447	Ld1
17	14498142	14501531	3.389	5	gain	0.083327	0.270143	0.083327	Ld1
17	17094116	17104283	10.167	4	gain	0.0143401	0.0366852	0.0143401	Ld1
17	54867910	54878077	10.167	0	loss	0.014307	0.0366328	0.014307	Ld1
17	56121840	56125229	3.389	4	gain	0.0833527	0.270187	0.0833527	Ld1
17	67525825	67549548	23.723	5	gain	2.22419e-05	1.24421e-05	2.22419e-05	Ld1
17	67630884	67637662	6.778	6	gain	0.0143152	0.036645	0.0143152	Ld1
17	67644440	67647829	3.389	6	gain	0.0832866	0.270073	0.0832866	Ld1
17	67664774	67668163	3.389	6	gain	0.0832902	0.270079	0.0832902	Ld1
17	67668163	67671552	3.389	4	gain	0.0833674	0.270213	0.0833674	Ld1
17	67674941	67678330	3.389	3	gain	0.0836693	0.270737	0.0836693	Ld1
18	23567106	23577273	10.167	1	loss	0.0143465	0.0366939	0.0143465	Ld1
18	32188722	32192111	3.389	1	loss	0.0833013	0.270098	0.0833013	Ld1
1	17587374	17590797	3.423	1	loss	0.0832682	0.270041	0.0832682	Ld2
1	48175302	48182148	6.846	1	loss	0.0143094	0.0366399	0.0143094	Ld2
1	66840921	66844344	3.423	0	loss	0.0832682	0.270041	0.0832682	Ld2
1	84626829	84630252	3.423	1	loss	0.0833055	0.270105	0.0833055	Ld2
1	95097786	95118324	20.538	3	gain	0.00271627	0.00498036	0.00271627	Ld2
1	133900914	133914606	13.692	4	gain	0.000535064	0.000675737	0.000535064	Ld2
1	140764029	140767452	3.423	1	loss	0.083298	0.270092	0.083298	Ld2
1	150813957	150817380	3.423	3	gain	0.0835031	0.270448	0.0835031	Ld2
1	162198855	162202278	3.423	1	loss	0.0833055	0.270105	0.0833055	Ld2
1	193447422	193450845	3.423	0	loss	0.0832682	0.270041	0.0832682	Ld2
1	281949087	281952510	3.423	3	gain	0.0834247	0.270312	0.0834247	Ld2
1	313067580	313084695	17.115	7	gain	0.00053243	0.000671509	0.00053243	Ld2
1	313105233	313108656	3.423	3	gain	0.083518	0.270474	0.083518	Ld2
2	11439666	11443089	3.423	6	gain	0.0832943	0.270086	0.0832943	Ld2
2	11651892	11655315	3.423	4	gain	0.0834024	0.270274	0.0834024	Ld2
2	11699814	11703237	3.423	1	loss	0.0837497	0.270876	0.0837497	Ld2
2	11754582	11758005	3.423	6	gain	0.0832869	0.270073	0.0832869	Ld2
2	12757521	12760944	3.423	3	gain	0.0834285	0.270319	0.0834285	Ld2
2	13763883	13767306	3.423	4	gain	0.0833763	0.270228	0.0833763	Ld2
2	13842612	13846035	3.423	3	gain	0.0835031	0.270448	0.0835031	Ld2
2	14006916	14061684	54.768	4	gain	2.22355e-05	1.23616e-05	2.22355e-05	Ld2
2	14061684	14917434	855.75	5	gain	0.239873	0.251656	0.239873	Ld2
2	14917434	14948241	30.807	6	gain	0.00270242	0.00496092	0.00270242	Ld2
2	14948241	15153621	205.38	5	gain	9.68463e-07	2.2616e-07	9.68463e-07	Ld2
2	15194697	15198120	3.423	4	gain	0.0833576	0.270196	0.0833576	Ld2
2	15201543	15204966	3.423	6	gain	0.0832869	0.270073	0.0832869	Ld2
2	28523859	28527282	3.423	1	loss	0.0832682	0.270041	0.0832682	Ld2
2	53669217	53689755	20.538	4	gain	0.000108086	9.11458e-05	0.000108086	Ld2
2	55401255	55408101	6.846	0	loss	0.0143071	0.0366328	0.0143071	Ld2
2	55627173	55859937	232.764	3	gain	9.50718e-09	5.86523e-10	9.50718e-09	Ld2
2	57674127	57677550	3.423	4	gain	0.0833688	0.270215	0.0833688	Ld2
2	62627208	62651169	23.961	8	gain	0.000532326	0.000671379	0.000532326	Ld2
2	62832588	62839434	6.846	3	gain	0.0143571	0.0367143	0.0143571	Ld2
2	67991049	67994472	3.423	10	gain	0.083272	0.270047	0.083272	Ld2
2	133651035	133657881	6.846	1	loss	0.0143188	0.0366682	0.0143188	Ld2
2	158573898	158587590	13.692	3	gain	0.000640798	0.00102829	0.000640798	Ld2
2	158614974	158645781	30.807	4	gain	0.00271197	0.00497315	0.00271197	Ld2
2	158652627	158666319	13.692	3	gain	0.00273451	0.00503364	0.00273451	Ld2
2	158690280	158714241	23.961	3	gain	0.00271638	0.00498072	0.00271638	Ld2
2	159508377	159511800	3.423	0	loss	0.0832682	0.270041	0.0832682	Ld2
2	160240899	160244322	3.423	4	gain	0.0833875	0.270248	0.0833875	Ld2
2	160429164	160432587	3.423	6	gain	0.083298	0.270092	0.083298	Ld2
2	160521585	160583199	61.614	4	gain	2.05501e-07	3.07092e-08	2.05501e-07	Ld2
2	161144571	161161686	17.115	3	gain	0.00271821	0.00498036	0.00271821	Ld2
2	161503986	161517678	13.692	4	gain	0.0143435	0.0366948	0.0143435	Ld2
3	22317960	22321383	3.423	5	gain	0.0833502	0.270183	0.0833502	Ld2
3	45375288	45382134	6.846	10	gain	0.0143082	0.0366346	0.0143082	Ld2
3	51430575	51433998	3.423	3	gain	0.0834695	0.27039	0.0834695	Ld2
3	69394479	69397902	3.423	3	gain	0.0834397	0.270338	0.0834397	Ld2
3	100328130	100382898	54.768	3	gain	4.65444e-06	1.67958e-06	4.65444e-06	Ld2
3	101111997	101115420	3.423	1	loss	0.0832682	0.270041	0.0832682	Ld2
3	113516949	113547756	30.807	3	gain	0.000538484	0.000677501	0.000538484	Ld2
3	132422178	132425601	3.423	1	loss	0.0832682	0.270041	0.0832682	Ld2
3	144392409	144399255	6.846	0	loss	0.0143071	0.0366328	0.0143071	Ld2
3	144409524	144416370	6.846	3	gain	0.0143689	0.0367515	0.0143689	Ld2
4	15704724	15708147	3.423	1	loss	0.0833018	0.270099	0.0833018	Ld2
4	25942917	25946340	3.423	1	loss	0.0832682	0.270041	0.0832682	Ld2
4	50995854	50999277	3.423	4	gain	0.0833986	0.270267	0.0833986	Ld2
4	72163686	72286914	123.228	0	loss	4.37348e-14	1.11022e-16	4.37348e-14	Ld2
4	77106498	77144151	37.653	0	loss	2.20997e-05	1.22938e-05	2.20997e-05	Ld2
4	81778893	81782316	3.423	1	loss	0.0833129	0.270118	0.0833129	Ld2
4	96894861	96898284	3.423	3	gain	0.0834285	0.270319	0.0834285	Ld2
4	108899322	108902745	3.423	4	gain	0.0834061	0.27028	0.0834061	Ld2
4	111408381	111411804	3.423	4	gain	0.08338	0.270235	0.08338	Ld2
5	21270522	21284214	13.692	5	gain	0.00270789	0.00496667	0.00270789	Ld2
5	22016736	22020159	3.423	5	gain	0.0833055	0.270105	0.0833055	Ld2
5	22187886	22194732	6.846	3	gain	0.0143694	0.0367444	0.0143694	Ld2
5	22441188	22444611	3.423	1	loss	0.083272	0.270047	0.083272	Ld2
5	33969852	33973275	3.423	3	gain	0.083518	0.270474	0.083518	Ld2
5	66029670	66033093	3.423	8	gain	0.083272	0.270047	0.083272	Ld2
5	66046785	66050208	3.423	7	gain	0.0832794	0.27006	0.0832794	Ld2
5	86362290	86365713	3.423	4	gain	0.0833763	0.270228	0.0833763	Ld2
5	94454262	94461108	6.846	5	gain	0.0143294	0.0366824	0.0143294	Ld2
5	98250369	98253792	3.423	5	gain	0.0833427	0.27017	0.0833427	Ld2
5	98253792	98257215	3.423	6	gain	0.083298	0.270092	0.083298	Ld2
5	107694426	107697849	3.423	1	loss	0.0832682	0.270041	0.0832682	Ld2
6	12062652	12066075	3.423	1	loss	0.0832682	0.270041	0.0832682	Ld2
6	21054873	21058296	3.423	0	loss	0.0832682	0.270041	0.0832682	Ld2
6	45382134	45385557	3.423	4	gain	0.0833688	0.270215	0.0833688	Ld2
6	55907859	55911282	3.423	3	gain	0.0834397	0.270338	0.0834397	Ld2
6	56924490	56927913	3.423	5	gain	0.0833129	0.270118	0.0833129	Ld2
6	91513905	91517328	3.423	1	loss	0.0832682	0.270041	0.0832682	Ld2
6	95364780	95368203	3.423	1	loss	0.0833055	0.270105	0.0833055	Ld2
6	107516430	107622543	106.113	0	loss	4.53033e-16	0	4.53033e-16	Ld2
6	118137999	118141422	3.423	0	loss	0.0832682	0.270041	0.0832682	Ld2
6	151991469	151994892	3.423	4	gain	0.0834098	0.270286	0.0834098	Ld2
6	154462875	154466298	3.423	3	gain	0.0834732	0.270397	0.0834732	Ld2
6	154510797	154534758	23.961	3	gain	0.000571552	0.00078977	0.000571552	Ld2
7	15851913	15855336	3.423	4	gain	0.0833763	0.270228	0.0833763	Ld2
7	25970301	25973724	3.423	5	gain	0.0833502	0.270183	0.0833502	Ld2
7	26576172	26583018	6.846	11	gain	0.0143082	0.0366346	0.0143082	Ld2
7	63489804	63493227	3.423	3	gain	0.0834359	0.270332	0.0834359	Ld2
7	76986693	76990116	3.423	1	loss	0.0832943	0.270086	0.0832943	Ld2
7	84212646	84216069	3.423	4	gain	0.0833614	0.270202	0.0833614	Ld2
7	84219492	84222915	3.423	3	gain	0.083518	0.270474	0.083518	Ld2
7	101067498	101070921	3.423	1	loss	0.0832682	0.270041	0.0832682	Ld2
7	102782421	102785844	3.423	3	gain	0.0834247	0.270312	0.0834247	Ld2
7	110864124	110867547	3.423	1	loss	0.0832682	0.270041	0.0832682	Ld2
7	111593223	111596646	3.423	3	gain	0.0834434	0.270345	0.0834434	Ld2
7	112007406	112010829	3.423	1	loss	0.0832682	0.270041	0.0832682	Ld2
8	26264679	26271525	6.846	1	loss	0.0143147	0.0366541	0.0143147	Ld2
8	37830996	37834419	3.423	1	loss	0.0832682	0.270041	0.0832682	Ld2
8	43311219	43314642	3.423	3	gain	0.0834285	0.270319	0.0834285	Ld2
8	43663788	43667211	3.423	7	gain	0.0832831	0.270067	0.0832831	Ld2
8	43715133	43882860	167.727	5	gain	4.35547e-08	4.15127e-09	4.35547e-08	Ld2
8	57010065	57023757	13.692	3	gain	0.0143582	0.0367107	0.0143582	Ld2
8	70578837	70582260	3.423	6	gain	0.0832869	0.270073	0.0832869	Ld2
8	70880061	70890330	10.269	3	gain	0.0143742	0.0367373	0.0143742	Ld2
8	70931406	70938252	6.846	3	gain	0.0143683	0.0367515	0.0143683	Ld2
8	72553908	72557331	3.423	1	loss	0.0832682	0.270041	0.0832682	Ld2
8	81662511	81720702	58.191	1	loss	2.55892e-05	2.13248e-05	2.55892e-05	Ld2
8	81758355	81765201	6.846	1	loss	0.0143094	0.0366399	0.0143094	Ld2
8	94635681	94639104	3.423	0	loss	0.0832682	0.270041	0.0832682	Ld2
8	105144291	105147714	3.423	1	loss	0.0832682	0.270041	0.0832682	Ld2
8	108779517	108782940	3.423	0	loss	0.0832682	0.270041	0.0832682	Ld2
8	112582470	112589316	6.846	1	loss	0.0143118	0.036647	0.0143118	Ld2
8	115426983	115430406	3.423	1	loss	0.0833129	0.270118	0.0833129	Ld2
8	129242211	129245634	3.423	1	loss	0.0832682	0.270041	0.0832682	Ld2
8	131877921	131881344	3.423	1	loss	0.0833055	0.270105	0.0833055	Ld2
9	3717378	3724224	6.846	4	gain	0.0143476	0.0367125	0.0143476	Ld2
9	5151615	5346726	195.111	4	gain	4.64819e-16	0	4.64819e-16	Ld2
9	5565798	5569221	3.423	7	gain	0.0832757	0.270054	0.0832757	Ld2
9	5586336	5589759	3.423	5	gain	0.0833427	0.27017	0.0833427	Ld2
9	11128173	11131596	3.423	6	gain	0.0833018	0.270099	0.0833018	Ld2
9	56968989	56972412	3.423	3	gain	0.0834658	0.270384	0.0834658	Ld2
9	92243004	92246427	3.423	0	loss	0.0832682	0.270041	0.0832682	Ld2
10	5312496	5315919	3.423	1	loss	0.0833129	0.270118	0.0833129	Ld2
10	10073889	10077312	3.423	1	loss	0.0832682	0.270041	0.0832682	Ld2
10	22598646	22602069	3.423	7	gain	0.0832757	0.270054	0.0832757	Ld2
10	23461242	23543394	82.152	3	gain	3.10696e-08	1.36216e-07	3.10696e-08	Ld2
10	23546817	23656353	109.536	3	gain	2.10786e-07	3.22748e-08	2.10786e-07	Ld2
10	23738505	23779581	41.076	3	gain	3.43951e-05	9.78856e-06	3.43951e-05	Ld2
10	46621260	46624683	3.423	4	gain	0.0833576	0.270196	0.0833576	Ld2
10	46624683	46628106	3.423	6	gain	0.083298	0.270092	0.083298	Ld2
10	48527871	48531294	3.423	0	loss	0.0832682	0.270041	0.0832682	Ld2
10	68240928	68329926	88.998	3	gain	4.33506e-10	1.04435e-11	4.33506e-10	Ld2
10	68333349	68347041	13.692	4	gain	0.00278827	0.00522859	0.00278827	Ld2
10	68377848	68415501	37.653	3	gain	0.000535397	0.000673783	0.000535397	Ld2
10	76904541	76907964	3.423	9	gain	0.083272	0.270047	0.083272	Ld2
11	19531638	19535061	3.423	1	loss	0.0832682	0.270041	0.0832682	Ld2
11	29109192	29112615	3.423	1	loss	0.0834546	0.270364	0.0834546	Ld2
11	31471062	31505292	34.23	1	loss	2.21402e-05	1.23294e-05	2.21402e-05	Ld2
11	44481885	44485308	3.423	1	loss	0.0833576	0.270196	0.0833576	Ld2
11	46022235	46025658	3.423	1	loss	0.0832682	0.270041	0.0832682	Ld2
11	57184638	57191484	6.846	0	loss	0.0143071	0.0366328	0.0143071	Ld2
11	64667316	64670739	3.423	1	loss	0.0833055	0.270105	0.0833055	Ld2
11	79687440	79690863	3.423	1	loss	0.0833502	0.270183	0.0833502	Ld2
12	6377049	6380472	3.423	1	loss	0.0837198	0.270824	0.0837198	Ld2
12	30830961	30916536	85.575	1	loss	2.03776e-07	3.05362e-08	2.03776e-07	Ld2
12	50893164	50930817	37.653	4	gain	0.000534773	0.000673327	0.000534773	Ld2
13	6989766	6993189	3.423	1	loss	0.0832682	0.270041	0.0832682	Ld2
13	38717553	38720976	3.423	1	loss	0.0832682	0.270041	0.0832682	Ld2
13	41983095	41986518	3.423	1	loss	0.0832869	0.270073	0.0832869	Ld2
13	53621295	53624718	3.423	1	loss	0.0832682	0.270041	0.0832682	Ld2
13	138409005	138415851	6.846	1	loss	0.0144902	0.0371115	0.0144902	Ld2
13	141239826	141253518	13.692	3	gain	0.00271519	0.00497783	0.00271519	Ld2
13	151823742	151827165	3.423	3	gain	0.0834658	0.270384	0.0834658	Ld2
13	164399844	164492265	92.421	1	loss	4.59813e-06	1.66686e-06	4.59813e-06	Ld2
13	170626281	170629704	3.423	1	loss	0.0833129	0.270118	0.0833129	Ld2
13	172580814	172584237	3.423	7	gain	0.0832869	0.270073	0.0832869	Ld2
13	172601352	172608198	6.846	5	gain	0.0143335	0.0367037	0.0143335	Ld2
13	183031233	183034656	3.423	1	loss	0.0833129	0.270118	0.0833129	Ld2
13	196877268	196880691	3.423	1	loss	0.0832869	0.270073	0.0832869	Ld2
13	203353584	203357007	3.423	1	loss	0.0833204	0.270131	0.0833204	Ld2
14	16878813	16882236	3.423	1	loss	0.0833018	0.270099	0.0833018	Ld2
14	23163441	23166864	3.423	1	loss	0.0833502	0.270183	0.0833502	Ld2
14	23776158	23779581	3.423	4	gain	0.0833614	0.270202	0.0833614	Ld2
14	35024136	35027559	3.423	1	loss	0.0832682	0.270041	0.0832682	Ld2
14	102772152	102775575	3.423	1	loss	0.0832682	0.270041	0.0832682	Ld2
14	103059684	103063107	3.423	1	loss	0.0832682	0.270041	0.0832682	Ld2
14	106486107	106489530	3.423	1	loss	0.083298	0.270092	0.083298	Ld2
15	18491046	18494469	3.423	3	gain	0.0835031	0.270448	0.0835031	Ld2
15	56630112	56650650	20.538	0	loss	2.20997e-05	1.22938e-05	2.20997e-05	Ld2
15	98373597	98397558	23.961	3	gain	0.000536605	0.000675346	0.000536605	Ld2
15	98568708	98575554	6.846	3	gain	0.0143742	0.0367444	0.0143742	Ld2
15	100766274	100773120	6.846	1	loss	0.0143071	0.0366328	0.0143071	Ld2
15	110182947	110206908	23.961	1	loss	0.00053243	0.000671703	0.00053243	Ld2
15	120143877	120150723	6.846	1	loss	0.0143753	0.0367941	0.0143753	Ld2
15	155291241	155294664	3.423	66	gain	0.0832682	0.270041	0.0832682	Ld2
15	157437462	157440885	3.423	4	gain	0.0833986	0.270267	0.0833986	Ld2
16	7605906	7636713	30.807	3	gain	0.000536772	0.000675411	0.000536772	Ld2
16	7677789	7681212	3.423	4	gain	0.0833614	0.270202	0.0833614	Ld2
16	7701750	7708596	6.846	3	gain	0.0143807	0.0367515	0.0143807	Ld2
16	10310076	10316922	6.846	1	loss	0.0143972	0.036883	0.0143972	Ld2
16	16060716	16064139	3.423	1	loss	0.0832682	0.270041	0.0832682	Ld2
16	30249051	30252474	3.423	3	gain	0.0834285	0.270319	0.0834285	Ld2
16	49476042	49482888	6.846	3	gain	0.0143665	0.0367302	0.0143665	Ld2
16	78431199	78438045	6.846	1	loss	0.0143948	0.0368243	0.0143948	Ld2
16	81392094	81395517	3.423	0	loss	0.0832682	0.270041	0.0832682	Ld2
17	10994676	11001522	6.846	4	gain	0.0143465	0.0367072	0.0143465	Ld2
17	14496405	14499828	3.423	4	gain	0.0833576	0.270196	0.0833576	Ld2
17	17094462	17097885	3.423	4	gain	0.0833986	0.270267	0.0833986	Ld2
17	17101308	17104731	3.423	3	gain	0.0834882	0.270422	0.0834882	Ld2
17	54867267	54880959	13.692	0	loss	0.00270017	0.00495804	0.00270017	Ld2
17	67525521	67528944	3.423	3	gain	0.0834247	0.270312	0.0834247	Ld2
17	67532367	67542636	10.269	5	gain	0.00270456	0.00496595	0.00270456	Ld2
17	67542636	67546059	3.423	3	gain	0.0834882	0.270422	0.0834882	Ld2
17	67546059	67549482	3.423	5	gain	0.0833427	0.27017	0.0833427	Ld2
17	67662441	67672710	10.269	4	gain	0.00270853	0.00497279	0.00270853	Ld2
18	22581531	22588377	6.846	1	loss	0.014492	0.0371294	0.014492	Ld2
18	23567355	23577624	10.269	1	loss	0.0143159	0.0366487	0.0143159	Ld2
18	25289124	25292547	3.423	3	gain	0.0834285	0.270319	0.0834285	Ld2
18	45368442	45371865	3.423	1	loss	0.0832831	0.270067	0.0832831	Ld2
1	48175680	48182112	6.432	1	loss	0.0144535	0.0370611	0.0144535	Ld3
1	75932976	75936192	3.216	1	loss	0.0832953	0.270088	0.0832953	Ld3
1	95097120	95116416	19.296	3	gain	0.000536924	0.00067493	0.000536924	Ld3
1	110627184	110630400	3.216	1	loss	0.0832748	0.270052	0.0832748	Ld3
1	133901376	133936752	35.376	4	gain	0.000108101	9.13205e-05	0.000108101	Ld3
1	162198960	162202176	3.216	1	loss	0.0832748	0.270052	0.0832748	Ld3
1	250056864	250063296	6.432	1	loss	0.0143871	0.0368218	0.0143871	Ld3
1	271587984	271591200	3.216	4	gain	0.0833639	0.270207	0.0833639	Ld3
1	281949936	281953152	3.216	4	gain	0.0833673	0.270213	0.0833673	Ld3
1	310491936	310501584	9.648	3	gain	0.0143925	0.0367859	0.0143925	Ld3
1	313048656	313074384	25.728	6	gain	0.00270418	0.00496263	0.00270418	Ld3
1	313074384	313077600	3.216	8	gain	0.0832851	0.27007	0.0832851	Ld3
1	313080816	313084032	3.216	6	gain	0.083309	0.270112	0.083309	Ld3
2	11439312	11442528	3.216	7	gain	0.0832919	0.270082	0.0832919	Ld3
2	11748048	11757696	9.648	6	gain	0.0143216	0.0366555	0.0143216	Ld3
2	14008896	14060352	51.456	4	gain	2.21897e-05	1.23393e-05	2.21897e-05	Ld3
2	14787168	15153792	366.624	5	gain	9.27815e-09	5.61105e-10	9.27815e-09	Ld3
2	15202032	15205248	3.216	6	gain	0.083309	0.270112	0.083309	Ld3
2	53668608	53687904	19.296	4	gain	0.000534722	0.000673373	0.000534722	Ld3
2	55402032	55411680	9.648	0	loss	0.00270014	0.004958	0.00270014	Ld3
2	55627152	55858704	231.552	3	gain	3.9667e-09	3.56222e-09	3.9667e-09	Ld3
2	62615520	62650896	35.376	7	gain	0.000532605	0.000671641	0.000532605	Ld3
2	62834208	62837424	3.216	3	gain	0.0834084	0.270284	0.0834084	Ld3
2	68188848	68192064	3.216	10	gain	0.0832748	0.270052	0.0832748	Ld3
2	68661600	68664816	3.216	4	gain	0.0834084	0.270284	0.0834084	Ld3
2	133653744	133656960	3.216	0	loss	0.0832679	0.27004	0.0832679	Ld3
2	158552016	158616336	64.32	3	gain	5.32878e-05	4.03249e-05	5.32878e-05	Ld3
2	158616336	158645280	28.944	4	gain	0.00271069	0.00497222	0.00271069	Ld3
2	158645280	158732112	86.832	3	gain	0.000139706	4.58611e-05	0.000139706	Ld3
2	160240416	160243632	3.216	4	gain	0.0833296	0.270147	0.0833296	Ld3
2	160417296	160433376	16.08	6	gain	0.00270349	0.00496263	0.00270349	Ld3
2	160516992	160571664	54.672	4	gain	4.37002e-08	4.16278e-09	4.37002e-08	Ld3
2	161504304	161517168	12.864	4	gain	0.0143286	0.0366652	0.0143286	Ld3
3	4904400	4907616	3.216	0	loss	0.0832679	0.27004	0.0832679	Ld3
3	38302560	38305776	3.216	3	gain	0.0834873	0.270421	0.0834873	Ld3
3	48494544	48495976	6.432	10	gain	0.0143091	0.0366359	0.0143091	Ld3
3	54581952	54585168	3.216	1	loss	0.0832953	0.270088	0.0832953	Ld3
3	75035712	75038928	3.216	1	loss	0.0832748	0.270052	0.0832748	Ld3
3	100326336	100384224	57.888	4	gain	4.36387e-08	4.16833e-09	4.36387e-08	Ld3
3	100400304	100403520	3.216	3	gain	0.0835182	0.270475	0.0835182	Ld3
3	113515152	113547312	32.16	3	gain	0.000119324	0.000118896	0.000119324	Ld3
3	120384528	120390960	6.432	3	gain	0.0144301	0.0368987	0.0144301	Ld3
3	132422016	132428448	6.432	1	loss	0.0143605	0.0367941	0.0143605	Ld3
3	144391968	144430560	38.592	1	loss	3.9017e-05	7.00943e-05	3.9017e-05	Ld3
4	50996112	50999328	3.216	4	gain	0.0834016	0.270272	0.0834016	Ld3
4	72163824	72286032	122.208	0	loss	4.37224e-14	1.11022e-16	4.37224e-14	Ld3
4	77097168	77142192	45.024	0	loss	4.59515e-06	1.66396e-06	4.59515e-06	Ld3
4	81776448	81802176	25.728	1	loss	0.00107066	0.00304404	0.00107066	Ld3
4	96894864	96898080	3.216	3	gain	0.0834873	0.270421	0.0834873	Ld3
4	99461232	99464448	3.216	4	gain	0.0833536	0.270189	0.0833536	Ld3
4	108720096	108723312	3.216	4	gain	0.0833296	0.270147	0.0833296	Ld3
4	110228400	110231616	3.216	5	gain	0.0833296	0.270147	0.0833296	Ld3
4	111408672	111411888	3.216	4	gain	0.083333	0.270153	0.083333	Ld3
4	113335056	113341488	6.432	1	loss	0.0144094	0.0368905	0.0144094	Ld3
4	126504576	126507792	3.216	1	loss	0.0832748	0.270052	0.0832748	Ld3
5	21244896	21254544	9.648	3	gain	0.0613398	0.139328	0.0613398	Ld3
5	21270624	21277056	6.432	6	gain	0.0143221	0.0366555	0.0143221	Ld3
5	22016736	22019952	3.216	8	gain	0.0832816	0.270064	0.0832816	Ld3
5	22190400	22203264	12.864	4	gain	0.0143389	0.0366962	0.0143389	Ld3
5	66018048	66021264	3.216	6	gain	0.0833022	0.2701	0.0833022	Ld3
5	66030912	66050208	19.296	8	gain	0.00270181	0.00496031	0.00270181	Ld3
5	86362464	86365680	3.216	4	gain	0.0833776	0.270231	0.0833776	Ld3
5	94457136	94460352	3.216	3	gain	0.0834702	0.270391	0.0834702	Ld3
5	107694192	107697408	3.216	1	loss	0.0832679	0.27004	0.0832679	Ld3
6	12864	16080	3.216	3	gain	0.0835251	0.270487	0.0835251	Ld3
6	11838096	11841312	3.216	1	loss	0.0832679	0.27004	0.0832679	Ld3
6	12063216	12066432	3.216	1	loss	0.0832679	0.27004	0.0832679	Ld3
6	21055152	21058368	3.216	0	loss	0.0832679	0.27004	0.0832679	Ld3
6	22312608	22315824	3.216	1	loss	0.083357	0.270195	0.083357	Ld3
6	42242160	42245376	3.216	4	gain	0.0834084	0.270284	0.0834084	Ld3
6	44956464	44959680	3.216	4	gain	0.0833296	0.270147	0.0833296	Ld3
6	56434368	56437584	3.216	3	gain	0.0834908	0.270427	0.0834908	Ld3
6	60968928	60972144	3.216	1	loss	0.0832679	0.27004	0.0832679	Ld3
6	72514368	72520800	6.432	3	gain	0.0144029	0.0368251	0.0144029	Ld3
6	90591504	90594720	3.216	1	loss	0.0832851	0.27007	0.0832851	Ld3
6	91514496	91517712	3.216	1	loss	0.0832679	0.27004	0.0832679	Ld3
6	95367264	95370480	3.216	1	loss	0.0832679	0.27004	0.0832679	Ld3
6	107514096	107623440	109.344	0	loss	4.7331e-18	0	4.7331e-18	Ld3
6	118139760	118142976	3.216	0	loss	0.0832679	0.27004	0.0832679	Ld3
6	127089888	127096320	6.432	1	loss	0.014328	0.0366815	0.014328	Ld3
6	154509504	154535232	25.728	3	gain	0.000109063	9.19919e-05	0.000109063	Ld3
7	25763376	25769808	6.432	7	gain	0.0143151	0.036649	0.0143151	Ld3
7	25773024	25776240	3.216	6	gain	0.0833125	0.270118	0.0833125	Ld3
7	31783728	31786944	3.216	4	gain	0.0833776	0.270231	0.0833776	Ld3
7	52443312	52452960	9.648	1	loss	0.014327	0.0366929	0.014327	Ld3
7	58836720	58839936	3.216	3	gain	0.0834496	0.270356	0.0834496	Ld3
7	84214176	84233472	19.296	4	gain	0.00270911	0.00497156	0.00270911	Ld3
7	87867552	87870768	3.216	1	loss	0.0832679	0.27004	0.0832679	Ld3
7	102783360	102786576	3.216	5	gain	0.0833227	0.270136	0.0833227	Ld3
7	112006848	112010064	3.216	0	loss	0.0832679	0.27004	0.0832679	Ld3
8	14353008	14356224	3.216	1	loss	0.0833947	0.270261	0.0833947	Ld3
8	26265072	26271504	6.432	1	loss	0.0143307	0.0366766	0.0143307	Ld3
8	43319520	43663632	344.112	5	gain	1.98913e-09	7.59871e-11	1.98913e-09	Ld3
8	43663632	43666848	3.216	9	gain	0.0832816	0.270064	0.0832816	Ld3
8	43666848	43882320	215.472	5	gain	2.04651e-07	3.05972e-08	2.04651e-07	Ld3
8	43891968	43895184	3.216	3	gain	0.0834359	0.270332	0.0834359	Ld3
8	70587984	70591200	3.216	13	gain	0.0832748	0.270052	0.0832748	Ld3
8	95878608	95885040	6.432	1	loss	0.0143167	0.0366522	0.0143167	Ld3
8	108781200	108784416	3.216	1	loss	0.0832679	0.27004	0.0832679	Ld3
8	124713264	124716480	3.216	1	loss	0.0832748	0.270052	0.0832748	Ld3
8	131878512	131881728	3.216	1	loss	0.0832885	0.270076	0.0832885	Ld3
9	3717696	3724128	6.432	4	gain	0.0143492	0.0366994	0.0143492	Ld3
9	5148816	5348208	199.392	4	gain	1.01179e-16	0	1.01179e-16	Ld3
9	5586192	5589408	3.216	5	gain	0.0833159	0.270124	0.0833159	Ld3
9	53060784	53064000	3.216	1	loss	0.0832679	0.27004	0.0832679	Ld3
10	22598832	22602048	3.216	20	gain	0.0832748	0.270052	0.0832748	Ld3
10	23515392	23656896	141.504	3	gain	2.03688e-10	2.58058e-10	2.03688e-10	Ld3
10	46622352	46628784	6.432	6	gain	0.014321	0.0366538	0.014321	Ld3
10	68240304	68413968	173.664	3	gain	9.87432e-15	0	9.87432e-15	Ld3
11	17138064	17141280	3.216	1	loss	0.0832851	0.27007	0.0832851	Ld3
11	28101408	28104624	3.216	1	loss	0.0835354	0.270505	0.0835354	Ld3
11	31471776	31503936	32.16	1	loss	2.21679e-05	1.23837e-05	2.21679e-05	Ld3
11	46020960	46024176	3.216	1	loss	0.0832679	0.27004	0.0832679	Ld3
11	51632880	51636096	3.216	1	loss	0.0834462	0.27035	0.0834462	Ld3
11	57183696	57186912	3.216	0	loss	0.0832679	0.27004	0.0832679	Ld3
11	62428992	62441856	12.864	1	loss	0.00270191	0.0049623	0.00270191	Ld3
11	66011616	66014832	3.216	1	loss	0.0835457	0.270522	0.0835457	Ld3
12	20231856	20235072	3.216	3	gain	0.0835148	0.270469	0.0835148	Ld3
12	50883552	50928576	45.024	3	gain	0.000108863	9.18185e-05	0.000108863	Ld3
13	38710992	38720640	9.648	1	loss	0.014347	0.0367451	0.014347	Ld3
13	59139024	59148672	9.648	1	loss	0.0143129	0.0366424	0.0143129	Ld3
13	96110160	96113376	3.216	1	loss	0.0832679	0.27004	0.0832679	Ld3
13	101834640	101956848	122.208	1	loss	4.38708e-14	1.11022e-16	4.38708e-14	Ld3
13	151824144	151827360	3.216	3	gain	0.0834496	0.270356	0.0834496	Ld3
13	164250768	164366544	115.776	3	gain	9.56185e-13	3.55271e-15	9.56185e-13	Ld3
13	164536992	164559504	22.512	1	loss	0.000541372	0.000692767	0.000541372	Ld3
13	172580208	172583424	3.216	6	gain	0.083309	0.270112	0.083309	Ld3
13	172605936	172609152	3.216	5	gain	0.0833159	0.270124	0.0833159	Ld3
13	190432224	190435440	3.216	1	loss	0.0832885	0.270076	0.0832885	Ld3
13	204261024	204283536	22.512	3	gain	0.00272178	0.0049908	0.00272178	Ld3
14	36125328	36128544	3.216	1	loss	0.0833604	0.270201	0.0833604	Ld3
14	38582352	38585568	3.216	4	gain	0.0833399	0.270165	0.0833399	Ld3
14	38688480	38691696	3.216	4	gain	0.0833536	0.270189	0.0833536	Ld3
14	45072240	45075456	3.216	1	loss	0.0833536	0.270189	0.0833536	Ld3
14	102773712	102776928	3.216	1	loss	0.0832748	0.270052	0.0832748	Ld3
14	106488192	106491408	3.216	1	loss	0.0833125	0.270118	0.0833125	Ld3
14	116187648	116190864	3.216	3	gain	0.0835319	0.270499	0.0835319	Ld3
14	116287344	116293776	6.432	3	gain	0.0143649	0.0367516	0.0143649	Ld3
14	131222448	131289984	67.536	3	gain	2.02756e-09	7.72115e-11	2.02756e-09	Ld3
14	142018560	142021776	3.216	1	loss	0.0832679	0.27004	0.0832679	Ld3
15	18537024	18540240	3.216	5	gain	0.0833262	0.270142	0.0833262	Ld3
15	20054976	20058192	3.216	3	gain	0.0834359	0.270332	0.0834359	Ld3
15	56630544	56649840	19.296	0	loss	2.2099e-05	1.22933e-05	2.2099e-05	Ld3
15	98374224	98396736	22.512	3	gain	0.000536445	0.000675349	0.000536445	Ld3
15	98567184	98580048	12.864	3	gain	0.000536655	0.00067469	0.000536655	Ld3
15	100766928	100773360	6.432	1	loss	0.0143097	0.0366408	0.0143097	Ld3
15	110183376	110218752	35.376	1	loss	0.000107891	9.15336e-05	0.000107891	Ld3
15	157436064	157439280	3.216	4	gain	0.0833639	0.270207	0.0833639	Ld3
16	1106304	1112736	6.432	1	loss	0.0143097	0.0366408	0.0143097	Ld3
16	6142560	6145776	3.216	3	gain	0.0834359	0.270332	0.0834359	Ld3
16	7605840	7609056	3.216	3	gain	0.0834084	0.270284	0.0834084	Ld3
16	7618704	7638000	19.296	3	gain	0.000543367	0.000688053	0.000543367	Ld3
16	7695888	7708752	12.864	3	gain	0.00286553	0.00543498	0.00286553	Ld3
16	16745712	16748928	3.216	3	gain	0.0834462	0.27035	0.0834462	Ld3
16	27348864	27352080	3.216	1	loss	0.083357	0.270195	0.083357	Ld3
16	30249696	30252912	3.216	3	gain	0.0834359	0.270332	0.0834359	Ld3
16	49478160	49481376	3.216	3	gain	0.0834976	0.270439	0.0834976	Ld3
16	51996288	51999504	3.216	1	loss	0.0832851	0.27007	0.0832851	Ld3
16	78431808	78438240	6.432	1	loss	0.0144175	0.0368905	0.0144175	Ld3
16	81396960	81409824	12.864	1	loss	0.0143654	0.0367761	0.0143654	Ld3
17	10995504	11001936	6.432	4	gain	0.0143394	0.0366994	0.0143394	Ld3
17	14497728	14500944	3.216	4	gain	0.0833296	0.270147	0.0833296	Ld3
17	16993344	16996560	3.216	1	loss	0.0832679	0.27004	0.0832679	Ld3
17	17093040	17102688	9.648	4	gain	0.0143372	0.0366815	0.0143372	Ld3
17	54868176	54877824	9.648	0	loss	0.014307	0.0366327	0.014307	Ld3
17	56550144	56553360	3.216	3	gain	0.083429	0.27032	0.083429	Ld3
17	67526352	67529568	3.216	4	gain	0.0833296	0.270147	0.0833296	Ld3
17	67532784	67552080	19.296	5	gain	0.00010783	9.10068e-05	0.00010783	Ld3
17	67664640	67667856	3.216	7	gain	0.0832988	0.270094	0.0832988	Ld3
17	67667856	67671072	3.216	4	gain	0.0833296	0.270147	0.0833296	Ld3
17	67674288	67677504	3.216	3	gain	0.0834564	0.270368	0.0834564	Ld3
18	37395648	37402080	6.432	3	gain	0.0143806	0.0367484	0.0143806	Ld3
1	66840588	66844224	3.636	0	loss	0.0832726	0.270048	0.0832726	Ld4
1	95106852	95117760	10.908	3	gain	0.00272067	0.00498199	0.00272067	Ld4
1	133906608	133913880	7.272	4	gain	0.0143232	0.0366657	0.0143232	Ld4
1	140764104	140767740	3.636	1	loss	0.0832767	0.270055	0.0832767	Ld4
1	193446108	193453380	7.272	1	loss	0.014311	0.0366407	0.014311	Ld4
1	198147456	198151092	3.636	1	loss	0.0832767	0.270055	0.0832767	Ld4
1	296555796	296559432	3.636	0	loss	0.0832686	0.270041	0.0832686	Ld4
1	308969100	308972736	3.636	3	gain	0.0835608	0.270548	0.0835608	Ld4
1	308983644	308987280	3.636	4	gain	0.0834105	0.270287	0.0834105	Ld4
1	313048692	313085052	36.36	7	gain	0.000107547	9.08297e-05	0.000107547	Ld4
2	11457036	11460672	3.636	6	gain	0.0832686	0.270041	0.0832686	Ld4
2	11747916	11758824	10.908	6	gain	0.0143072	0.036633	0.0143072	Ld4
2	13540464	13544100	3.636	5	gain	0.0832848	0.270069	0.0832848	Ld4
2	13765896	13769532	3.636	6	gain	0.0832686	0.270041	0.0832686	Ld4
2	13842252	13845888	3.636	3	gain	0.0835527	0.270534	0.0835527	Ld4
2	14005872	14020416	14.544	5	gain	0.00270207	0.00496122	0.00270207	Ld4
2	14918508	14922144	3.636	6	gain	0.0832686	0.270041	0.0832686	Ld4
2	14947596	14962140	14.544	5	gain	0.00270055	0.00495887	0.00270055	Ld4
2	14994864	14998500	3.636	9	gain	0.0832686	0.270041	0.0832686	Ld4
2	15129396	15133032	3.636	4	gain	0.0833294	0.270147	0.0833294	Ld4
2	15136668	15140304	3.636	5	gain	0.0832686	0.270041	0.0832686	Ld4
2	15391188	15394824	3.636	6	gain	0.0832686	0.270041	0.0832686	Ld4
2	15478452	15503904	25.452	4	gain	0.00270709	0.00496787	0.00270709	Ld4
2	43039332	43042968	3.636	1	loss	0.0832888	0.270076	0.0832888	Ld4
2	53674632	53689176	14.544	4	gain	0.00270942	0.00496983	0.00270942	Ld4
2	55401732	55409004	7.272	1	loss	0.0143116	0.0366426	0.0143116	Ld4
2	55634436	55685340	50.904	3	gain	0.000108468	9.14045e-05	0.000108468	Ld4
2	55856232	55859868	3.636	4	gain	0.08337	0.270217	0.08337	Ld4
2	62615556	62651916	36.36	6	gain	0.000107547	9.08297e-05	0.000107547	Ld4
2	62833716	62837352	3.636	4	gain	0.0833132	0.270118	0.0833132	Ld4
2	68007744	68011380	3.636	10	gain	0.0832686	0.270041	0.0832686	Ld4
2	68116824	68120460	3.636	5	gain	0.0832848	0.270069	0.0832848	Ld4
2	95623164	95626800	3.636	1	loss	0.0832888	0.270076	0.0832888	Ld4
2	104542272	104545908	3.636	1	loss	0.0832726	0.270048	0.0832726	Ld4
2	116621064	116628336	7.272	3	gain	0.0143879	0.0367545	0.0143879	Ld4
2	122856804	122860440	3.636	1	loss	0.0832726	0.270048	0.0832726	Ld4
2	141734916	141738552	3.636	0	loss	0.0832686	0.270041	0.0832686	Ld4
2	158551416	158555052	3.636	3	gain	0.0834755	0.2704	0.0834755	Ld4
2	158704128	158725944	21.816	3	gain	0.00056511	0.000761969	0.00056511	Ld4
2	159507684	159511320	3.636	1	loss	0.0832767	0.270055	0.0832767	Ld4
2	160242156	160245792	3.636	4	gain	0.083301	0.270097	0.083301	Ld4
2	160409412	160413048	3.636	5	gain	0.0832929	0.270083	0.0832929	Ld4
2	160416684	160434864	18.18	7	gain	0.00270044	0.00495887	0.00270044	Ld4
2	160529400	160583940	54.54	4	gain	4.62004e-06	1.67119e-06	4.62004e-06	Ld4
2	161143884	161151156	7.272	3	gain	0.0143822	0.0367545	0.0143822	Ld4
2	161503848	161518392	14.544	4	gain	0.00271258	0.00497493	0.00271258	Ld4
2	161609292	161612928	3.636	3	gain	0.0834389	0.270337	0.0834389	Ld4
3	22317768	22321404	3.636	5	gain	0.0832686	0.270041	0.0832686	Ld4
3	38301624	38305260	3.636	3	gain	0.0835405	0.270513	0.0835405	Ld4
3	45373644	45380916	7.272	11	gain	0.0143072	0.036633	0.0143072	Ld4
3	48486060	48496968	10.908	3	gain	0.00271867	0.00498317	0.00271867	Ld4
3	48689676	48693312	3.636	3	gain	0.083443	0.270344	0.083443	Ld4
3	69400332	69403968	3.636	3	gain	0.0834227	0.270309	0.0834227	Ld4
3	95979492	95983128	3.636	1	loss	0.0832767	0.270055	0.0832767	Ld4
3	100328148	100382688	54.54	3	gain	4.66589e-06	1.68384e-06	4.66589e-06	Ld4
3	113515920	113548644	32.724	3	gain	0.000538378	0.000676663	0.000538378	Ld4
3	120431592	120435228	3.636	3	gain	0.0835283	0.270492	0.0835283	Ld4
3	144392832	144400104	7.272	0	loss	0.0143072	0.036633	0.0143072	Ld4
3	144425556	144429192	3.636	1	loss	0.0834186	0.270302	0.0834186	Ld4
3	144774612	144785520	10.908	5	gain	0.0143097	0.0366407	0.0143097	Ld4
4	15703884	15707520	3.636	1	loss	0.0832888	0.270076	0.0832888	Ld4
4	34851060	34854696	3.636	1	loss	0.0833618	0.270203	0.0833618	Ld4
4	72163692	72287316	123.624	0	loss	9.52591e-15	0	9.52591e-15	Ld4
4	77108652	77141376	32.724	0	loss	0.000107547	9.08297e-05	0.000107547	Ld4
4	96895764	96899400	3.636	3	gain	0.0834389	0.270337	0.0834389	Ld4
4	108720036	108723672	3.636	4	gain	0.083301	0.270097	0.083301	Ld4
4	111407040	111410676	3.636	4	gain	0.0833537	0.270189	0.0833537	Ld4
4	122798628	122802264	3.636	3	gain	0.0835242	0.270485	0.0835242	Ld4
4	122954976	122958612	3.636	1	loss	0.0832929	0.270083	0.0832929	Ld4
4	141945804	142127604	181.8	3	gain	2.02801e-09	7.72611e-11	2.02801e-09	Ld4
5	13282308	13285944	3.636	1	loss	0.0832888	0.270076	0.0832888	Ld4
5	20812464	20816100	3.636	3	gain	0.0835446	0.27052	0.0835446	Ld4
5	21245148	21252420	7.272	3	gain	0.0156925	0.0407046	0.0156925	Ld4
5	22190508	22194144	3.636	3	gain	0.0834592	0.270372	0.0834592	Ld4
5	33014880	33018516	3.636	4	gain	0.0832969	0.27009	0.0832969	Ld4
5	33073056	33076692	3.636	4	gain	0.08337	0.270217	0.08337	Ld4
5	65989764	65993400	3.636	3	gain	0.0834389	0.270337	0.0834389	Ld4
5	66018852	66044304	25.452	14	gain	0.0027002	0.00495809	0.0027002	Ld4
5	86362272	86365908	3.636	4	gain	0.0834186	0.270302	0.0834186	Ld4
5	94456008	94459644	3.636	4	gain	0.0834146	0.270294	0.0834146	Ld4
5	98251992	98255628	3.636	7	gain	0.0832686	0.270041	0.0832686	Ld4
5	98255628	98259264	3.636	3	gain	0.0835242	0.270485	0.0835242	Ld4
5	105062220	105065856	3.636	1	loss	0.0832726	0.270048	0.0832726	Ld4
5	107694684	107698320	3.636	1	loss	0.0832726	0.270048	0.0832726	Ld4
6	21056076	21059712	3.636	1	loss	0.0832848	0.270069	0.0832848	Ld4
6	34265664	34269300	3.636	1	loss	0.0832807	0.270062	0.0832807	Ld4
6	44955504	44959140	3.636	4	gain	0.0833375	0.270161	0.0833375	Ld4
6	80708292	80711928	3.636	3	gain	0.0835242	0.270485	0.0835242	Ld4
6	97961112	97982928	21.816	1	loss	0.00270125	0.00495966	0.00270125	Ld4
6	107516520	107621964	105.444	0	loss	2.07669e-15	0	2.07669e-15	Ld4
6	118908108	118911744	3.636	3	gain	0.0834592	0.270372	0.0834592	Ld4
6	127089108	127096380	7.272	1	loss	0.0143136	0.0366445	0.0143136	Ld4
6	129957912	129976092	18.18	1	loss	0.00270079	0.00495887	0.00270079	Ld4
6	130376052	130386960	10.908	1	loss	0.00270219	0.004962	0.00270219	Ld4
6	151988436	151995708	7.272	3	gain	0.0143879	0.036828	0.0143879	Ld4
6	154511820	154537272	25.452	3	gain	0.000763727	0.00159258	0.000763727	Ld4
7	25764696	25771968	7.272	8	gain	0.0143072	0.036633	0.0143072	Ld4
7	25971948	25975584	3.636	6	gain	0.0832686	0.270041	0.0832686	Ld4
7	26579160	26582796	3.636	9	gain	0.0832686	0.270041	0.0832686	Ld4
7	28411704	28415340	3.636	1	loss	0.0832726	0.270048	0.0832726	Ld4
7	84213396	84227940	14.544	4	gain	0.00271059	0.00497415	0.00271059	Ld4
7	86187744	86198652	10.908	4	gain	0.0143392	0.0366812	0.0143392	Ld4
7	102782448	102786084	3.636	4	gain	0.0834227	0.270309	0.0834227	Ld4
7	111210696	111214332	3.636	1	loss	0.0832929	0.270083	0.0832929	Ld4
7	112006980	112010616	3.636	0	loss	0.0832726	0.270048	0.0832726	Ld4
8	4686804	4690440	3.636	1	loss	0.0833132	0.270118	0.0833132	Ld4
8	14354928	14358564	3.636	1	loss	0.0832888	0.270076	0.0832888	Ld4
8	43312032	43315668	3.636	3	gain	0.0834633	0.270379	0.0834633	Ld4
8	43319304	43882884	563.58	4	gain	2.00149e-11	1.90292e-13	2.00149e-11	Ld4
8	70578396	70582032	3.636	6	gain	0.0832686	0.270041	0.0832686	Ld4
8	87293088	87296724	3.636	1	loss	0.0832929	0.270083	0.0832929	Ld4
8	108781848	108785484	3.636	1	loss	0.0833537	0.270189	0.0833537	Ld4
8	112210596	112214232	3.636	1	loss	0.0832767	0.270055	0.0832767	Ld4
8	112566924	112588740	21.816	1	loss	0.0027051	0.0049714	0.0027051	Ld4
8	113752260	113755896	3.636	3	gain	0.0835527	0.270534	0.0835527	Ld4
8	114973956	114977592	3.636	1	loss	0.0832726	0.270048	0.0832726	Ld4
8	124714800	124718436	3.636	1	loss	0.0832888	0.270076	0.0832888	Ld4
8	126194652	126198288	3.636	1	loss	0.0832929	0.270083	0.0832929	Ld4
8	137593512	137597148	3.636	1	loss	0.083374	0.270224	0.083374	Ld4
8	138757032	138760668	3.636	1	loss	0.0834146	0.270294	0.0834146	Ld4
9	3719628	3723264	3.636	4	gain	0.0833497	0.270182	0.0833497	Ld4
9	5152212	5348556	196.344	4	gain	2.0466e-13	4.44089e-16	2.0466e-13	Ld4
9	5748516	5788512	39.996	0	loss	2.21006e-05	1.22942e-05	2.21006e-05	Ld4
9	11129796	11133432	3.636	6	gain	0.0832686	0.270041	0.0832686	Ld4
9	56783412	56787048	3.636	3	gain	0.0834674	0.270386	0.0834674	Ld4
9	56968848	56972484	3.636	3	gain	0.0834796	0.270407	0.0834796	Ld4
9	119544408	119548044	3.636	5	gain	0.0832848	0.270069	0.0832848	Ld4
9	119588040	119591676	3.636	3	gain	0.0835242	0.270485	0.0835242	Ld4
9	152352036	152355672	3.636	1	loss	0.0832929	0.270083	0.0832929	Ld4
10	465408	469044	3.636	1	loss	0.0832726	0.270048	0.0832726	Ld4
10	22608648	22612284	3.636	8	gain	0.0832686	0.270041	0.0832686	Ld4
10	23459472	23463108	3.636	3	gain	0.0834308	0.270323	0.0834308	Ld4
10	23517648	23655816	138.168	3	gain	6.92097e-10	4.13146e-10	6.92097e-10	Ld4
10	23739444	23779440	39.996	3	gain	0.000609119	0.000513428	0.000609119	Ld4
10	24375744	24383016	7.272	3	gain	0.0143738	0.0367429	0.0143738	Ld4
10	46620792	46624428	3.636	4	gain	0.0832969	0.27009	0.0832969	Ld4
10	46624428	46628064	3.636	7	gain	0.0832686	0.270041	0.0832686	Ld4
10	52100244	52103880	3.636	1	loss	0.0832767	0.270055	0.0832767	Ld4
10	68240448	68414976	174.528	3	gain	9.59003e-13	3.77476e-15	9.59003e-13	Ld4
10	76905036	76908672	3.636	9	gain	0.0832686	0.270041	0.0832686	Ld4
11	36007308	36021852	14.544	3	gain	0.0143918	0.0367893	0.0143918	Ld4
11	39759660	39763296	3.636	3	gain	0.0834755	0.2704	0.0834755	Ld4
11	57183372	57190644	7.272	0	loss	0.0143072	0.036633	0.0143072	Ld4
11	62517384	62681004	163.62	1	loss	4.28186e-12	2.54241e-14	4.28186e-12	Ld4
13	59143176	59146812	3.636	1	loss	0.0832767	0.270055	0.0832767	Ld4
13	61510212	61513848	3.636	1	loss	0.0832848	0.270069	0.0832848	Ld4
13	79766568	79770204	3.636	1	loss	0.0833456	0.270175	0.0833456	Ld4
13	86107752	86111388	3.636	1	loss	0.0832888	0.270076	0.0832888	Ld4
13	113530464	113534100	3.636	1	loss	0.0832848	0.270069	0.0832848	Ld4
13	114075864	114079500	3.636	1	loss	0.0832848	0.270069	0.0832848	Ld4
13	138378888	138382524	3.636	1	loss	0.0832969	0.27009	0.0832969	Ld4
13	138407976	138415248	7.272	1	loss	0.0151649	0.0392087	0.0151649	Ld4
13	151824816	151828452	3.636	4	gain	0.0834186	0.270302	0.0834186	Ld4
13	172531836	172535472	3.636	1	loss	0.0834877	0.270421	0.0834877	Ld4
13	172579104	172586376	7.272	5	gain	0.0143328	0.0367101	0.0143328	Ld4
13	172604556	172608192	3.636	5	gain	0.0832686	0.270041	0.0832686	Ld4
13	172749996	172753632	3.636	3	gain	0.083443	0.270344	0.083443	Ld4
13	183032604	183036240	3.636	1	loss	0.0832888	0.270076	0.0832888	Ld4
13	183672540	183676176	3.636	3	gain	0.0834958	0.270435	0.0834958	Ld4
13	197271180	197274816	3.636	1	loss	0.0832848	0.270069	0.0832848	Ld4
13	213476832	213480468	3.636	1	loss	0.0832726	0.270048	0.0832726	Ld4
14	23292216	23295852	3.636	1	loss	0.0832848	0.270069	0.0832848	Ld4
14	23775804	23779440	3.636	4	gain	0.0833497	0.270182	0.0833497	Ld4
14	55896228	55899864	3.636	1	loss	0.0833091	0.270111	0.0833091	Ld4
14	116188380	116192016	3.636	5	gain	0.0832686	0.270041	0.0832686	Ld4
14	116290188	116293824	3.636	3	gain	0.0835242	0.270485	0.0835242	Ld4
14	128485332	128488968	3.636	1	loss	0.0832726	0.270048	0.0832726	Ld4
14	131223240	131288688	65.448	3	gain	9.43921e-09	5.69052e-10	9.43921e-09	Ld4
14	132317676	132321312	3.636	1	loss	0.0832726	0.270048	0.0832726	Ld4
15	25571988	25575624	3.636	3	gain	0.0834755	0.2704	0.0834755	Ld4
15	37087200	37090836	3.636	1	loss	0.0833537	0.270189	0.0833537	Ld4
15	51751188	51754824	3.636	1	loss	0.0832929	0.270083	0.0832929	Ld4
15	53580096	53583732	3.636	1	loss	0.0833051	0.270104	0.0833051	Ld4
15	56630700	56648880	18.18	0	loss	0.000107547	9.08297e-05	0.000107547	Ld4
15	98386524	98397432	10.908	3	gain	0.00272137	0.00498278	0.00272137	Ld4
15	98568324	98579232	10.908	3	gain	0.00271926	0.00498435	0.00271926	Ld4
15	100262700	100266336	3.636	1	loss	0.0832848	0.270069	0.0832848	Ld4
15	100768104	100771740	3.636	1	loss	0.0832767	0.270055	0.0832767	Ld4
15	137971656	137975292	3.636	1	loss	0.0834186	0.270302	0.0834186	Ld4
15	146585340	146588976	3.636	1	loss	0.083374	0.270224	0.083374	Ld4
16	1105344	1112616	7.272	0	loss	0.0143072	0.036633	0.0143072	Ld4
16	7617420	7639236	21.816	3	gain	0.00053913	0.000678015	0.00053913	Ld4
16	7675596	7679232	3.636	4	gain	0.08337	0.270217	0.08337	Ld4
16	7697412	7708320	10.908	3	gain	0.0144072	0.0367989	0.0144072	Ld4
16	10311696	10318968	7.272	1	loss	0.0144375	0.037018	0.0144375	Ld4
16	16060212	16063848	3.636	1	loss	0.0832726	0.270048	0.0832726	Ld4
16	16743780	16751052	7.272	3	gain	0.0144556	0.0369694	0.0144556	Ld4
16	31542300	31545936	3.636	1	loss	0.0834674	0.270386	0.0834674	Ld4
16	32651280	32654916	3.636	1	loss	0.0832929	0.270083	0.0832929	Ld4
16	78432156	78435792	3.636	0	loss	0.0832726	0.270048	0.0832726	Ld4
17	10995264	11002536	7.272	4	gain	0.0143417	0.0366985	0.0143417	Ld4
17	14253120	14260392	7.272	1	loss	0.0143104	0.0366388	0.0143104	Ld4
17	14496732	14500368	3.636	5	gain	0.0832848	0.270069	0.0832848	Ld4
17	17085564	17089200	3.636	3	gain	0.0835405	0.270513	0.0835405	Ld4
17	17092836	17103744	10.908	4	gain	0.0143501	0.0366985	0.0143501	Ld4
17	21939624	21943260	3.636	1	loss	0.0832929	0.270083	0.0832929	Ld4
17	35883684	35887320	3.636	1	loss	0.0832888	0.270076	0.0832888	Ld4
17	54867240	54878148	10.908	0	loss	0.0143072	0.036633	0.0143072	Ld4
17	56121660	56125296	3.636	4	gain	0.0834227	0.270309	0.0834227	Ld4
17	67531428	67535064	3.636	4	gain	0.0833132	0.270118	0.0833132	Ld4
17	67538700	67542336	3.636	5	gain	0.0832686	0.270041	0.0832686	Ld4
17	67542336	67545972	3.636	3	gain	0.0834389	0.270337	0.0834389	Ld4
17	67545972	67549608	3.636	6	gain	0.0832686	0.270041	0.0832686	Ld4
17	67633236	67636872	3.636	5	gain	0.0832848	0.270069	0.0832848	Ld4
17	67644144	67647780	3.636	6	gain	0.0832686	0.270041	0.0832686	Ld4
17	67662324	67673232	10.908	4	gain	0.00270779	0.00497219	0.00270779	Ld4
18	23561280	23568552	7.272	1	loss	0.0143809	0.0368473	0.0143809	Ld4
18	44330112	44333748	3.636	1	loss	0.0832929	0.270083	0.0832929	Ld4
1	53957452	53960696	3.244	3	gain	0.0834692	0.27039	0.0834692	Ld5
1	95097860	95117324	19.464	3	gain	0.000537567	0.000675889	0.000537567	Ld5
1	119742528	119745772	3.244	1	loss	0.0832888	0.270077	0.0832888	Ld5
1	133902588	133912320	9.732	4	gain	0.00271043	0.0049724	0.00271043	Ld5
1	172003368	172006612	3.244	1	loss	0.0833269	0.270143	0.0833269	Ld5
1	271587680	271590924	3.244	4	gain	0.083379	0.270233	0.083379	Ld5
1	308984512	308987756	3.244	4	gain	0.083372	0.270221	0.083372	Ld5
1	313049244	313052488	3.244	5	gain	0.0833131	0.270119	0.0833131	Ld5
1	313068708	313084928	16.22	7	gain	0.000532574	0.000671468	0.000532574	Ld5
2	8697164	8700408	3.244	4	gain	0.0834102	0.270287	0.0834102	Ld5
2	11756256	11759500	3.244	8	gain	0.0832888	0.270077	0.0832888	Ld5
2	14919156	15366828	447.672	5	gain	4.26758e-10	1.02915e-11	4.26758e-10	Ld5
2	15366828	15506320	139.492	4	gain	4.62389e-06	1.67501e-06	4.62389e-06	Ld5
2	53668736	53694688	25.952	4	gain	0.000534137	0.000673585	0.000534137	Ld5
2	55401032	55407520	6.488	1	loss	0.0143201	0.0366541	0.0143201	Ld5
2	55631356	55650820	19.464	4	gain	0.00271313	0.00497341	0.00271313	Ld5
2	55667040	55861680	194.64	3	gain	3.17425e-06	5.63688e-06	3.17425e-06	Ld5
2	62615688	62651372	35.684	6	gain	0.000532747	0.00067165	0.000532747	Ld5
2	62833036	62839524	6.488	4	gain	0.0143278	0.0366657	0.0143278	Ld5
2	64536136	64539380	3.244	4	gain	0.0833998	0.270269	0.0833998	Ld5
2	133652800	133656044	3.244	0	loss	0.0832749	0.270052	0.0832749	Ld5
2	158573208	158612136	38.928	3	gain	0.00182157	0.00158193	0.00182157	Ld5
2	158615380	158683504	68.124	3	gain	0.00524459	0.0207851	0.00524459	Ld5
2	158712700	159027368	314.668	3	gain	1.58458e-07	2.67127e-08	1.58458e-07	Ld5
2	160123840	160127084	3.244	4	gain	0.0833512	0.270185	0.0833512	Ld5
2	160240624	160243868	3.244	4	gain	0.0833408	0.270167	0.0833408	Ld5
2	160409312	160432020	22.708	6	gain	0.00270383	0.00496403	0.00270383	Ld5
2	160516364	160571512	55.148	4	gain	4.36956e-08	4.16421e-09	4.36956e-08	Ld5
2	161502540	161515516	12.976	4	gain	0.00271003	0.00497173	0.00271003	Ld5
3	6069524	6072768	3.244	3	gain	0.0834762	0.270402	0.0834762	Ld5
3	45373828	45380316	6.488	11	gain	0.0143108	0.0366393	0.0143108	Ld5
3	95976984	95983472	6.488	1	loss	0.014336	0.0367069	0.014336	Ld5
3	100327188	100395312	68.124	3	gain	9.81693e-07	2.29277e-07	9.81693e-07	Ld5
3	113517292	113552976	35.684	3	gain	0.000541957	0.000682909	0.000541957	Ld5
3	144390440	144400172	9.732	0	loss	0.00270064	0.00495867	0.00270064	Ld5
3	144409904	144429368	19.464	1	loss	0.00547129	0.0173844	0.00547129	Ld5
3	144773232	144786208	12.976	5	gain	0.0143223	0.0366558	0.0143223	Ld5
4	30019976	30032952	12.976	1	loss	0.00274583	0.00507631	0.00274583	Ld5
4	50943776	50953508	9.732	3	gain	0.00272144	0.00498348	0.00272144	Ld5
4	50995680	50998924	3.244	5	gain	0.0833165	0.270125	0.0833165	Ld5
4	72162780	72286052	123.272	0	loss	2.01206e-13	4.44089e-16	2.01206e-13	Ld5
4	77096904	77142320	45.416	0	loss	4.59631e-06	1.6645e-06	4.59631e-06	Ld5
4	96895036	96898280	3.244	3	gain	0.0834762	0.270402	0.0834762	Ld5
4	108719416	108722660	3.244	3	gain	0.0834553	0.270366	0.0834553	Ld5
4	110227876	110231120	3.244	6	gain	0.0833026	0.270101	0.0833026	Ld5
4	111408692	111411936	3.244	4	gain	0.0833755	0.270227	0.0833755	Ld5
5	20800528	20816748	16.22	3	gain	0.0027326	0.00501211	0.0027326	Ld5
5	21244956	21277396	32.44	6	gain	2.21532e-05	1.23249e-05	2.21532e-05	Ld5
5	21991076	21994320	3.244	8	gain	0.0832853	0.270071	0.0832853	Ld5
5	33010944	33020676	9.732	4	gain	0.00270843	0.0049714	0.00270843	Ld5
5	33072580	33079068	6.488	4	gain	0.0143382	0.036692	0.0143382	Ld5
5	66018644	66021888	3.244	7	gain	0.0832888	0.270077	0.0832888	Ld5
5	94452304	94458792	6.488	5	gain	0.0143223	0.0366558	0.0143223	Ld5
5	98251028	98257516	6.488	5	gain	0.0143228	0.0366574	0.0143228	Ld5
5	107694312	107697556	3.244	1	loss	0.0832888	0.270077	0.0832888	Ld5
6	12976	16220	3.244	3	gain	0.0836326	0.270673	0.0836326	Ld5
6	1696612	1699856	3.244	0	loss	0.0832714	0.270052	0.0832714	Ld5
6	44955352	44958596	3.244	4	gain	0.0833928	0.270257	0.0833928	Ld5
6	45383560	45386804	3.244	4	gain	0.0833408	0.270167	0.0833408	Ld5
6	95367112	95370356	3.244	1	loss	0.0832784	0.270058	0.0832784	Ld5
6	103029440	103032684	3.244	1	loss	0.0832749	0.270052	0.0832749	Ld5
6	107515892	107622944	107.052	0	loss	1.03754e-18	0	1.03754e-18	Ld5
6	127090188	127096676	6.488	1	loss	0.0143628	0.036763	0.0143628	Ld5
6	154511720	154537672	25.952	3	gain	2.30016e-05	1.31109e-05	2.30016e-05	Ld5
6	156289432	156292676	3.244	3	gain	0.08349	0.270426	0.08349	Ld5
7	25971464	25974708	3.244	5	gain	0.0833304	0.270149	0.0833304	Ld5
7	26578092	26581336	3.244	11	gain	0.0832784	0.270058	0.0832784	Ld5
7	58836428	58839672	3.244	3	gain	0.0834657	0.270384	0.0834657	Ld5
7	81745556	82167276	421.72	1	loss	2.55458e-21	0	2.55458e-21	Ld5
7	84214240	84262900	48.66	4	gain	0.000108282	9.14604e-05	0.000108282	Ld5
7	86186592	86199568	12.976	3	gain	0.00271974	0.00498415	0.00271974	Ld5
7	102782896	102786140	3.244	3	gain	0.0834275	0.270317	0.0834275	Ld5
7	103723656	103743120	19.464	3	gain	0.00272114	0.00498516	0.00272114	Ld5
8	14354700	14357944	3.244	1	loss	0.0833269	0.270143	0.0833269	Ld5
8	43664240	43667484	3.244	7	gain	0.0832888	0.270077	0.0832888	Ld5
8	43716144	43881588	165.444	4	gain	9.32019e-09	5.64344e-10	9.32019e-09	Ld5
8	43891320	43894564	3.244	3	gain	0.083438	0.270336	0.083438	Ld5
8	70573220	70582952	9.732	4	gain	0.0143316	0.0366722	0.0143316	Ld5
8	70926816	70930060	3.244	4	gain	0.0833581	0.270197	0.0833581	Ld5
8	95626632	95629876	3.244	1	loss	0.0832888	0.270077	0.0832888	Ld5
8	101358780	101362024	3.244	1	loss	0.0835144	0.270468	0.0835144	Ld5
8	105144528	105147772	3.244	1	loss	0.0833131	0.270119	0.0833131	Ld5
8	108781052	108784296	3.244	1	loss	0.0832749	0.270052	0.0832749	Ld5
8	112209960	112213204	3.244	1	loss	0.0832922	0.270083	0.0832922	Ld5
8	114973848	114977092	3.244	1	loss	0.0832749	0.270052	0.0832749	Ld5
8	127116140	127119384	3.244	1	loss	0.0833477	0.270179	0.0833477	Ld5
8	145954048	145957292	3.244	1	loss	0.0833269	0.270143	0.0833269	Ld5
9	3717624	3724112	6.488	4	gain	0.0143524	0.0367069	0.0143524	Ld5
9	4895196	4898440	3.244	3	gain	0.0837021	0.270794	0.0837021	Ld5
9	5154716	5346112	191.396	4	gain	4.45778e-14	1.11022e-16	4.45778e-14	Ld5
9	5586168	5589412	3.244	8	gain	0.0832818	0.270065	0.0832818	Ld5
9	57188476	57217672	29.196	0	loss	2.21046e-05	1.22967e-05	2.21046e-05	Ld5
9	57233892	57263088	29.196	1	loss	0.00270264	0.00496235	0.00270264	Ld5
9	113329140	113332384	3.244	0	loss	0.0832714	0.270052	0.0832714	Ld5
10	23460608	23463852	3.244	4	gain	0.0834241	0.270311	0.0834241	Ld5
10	23493048	23622808	129.76	3	gain	2.44647e-06	9.68509e-07	2.44647e-06	Ld5
10	23739592	23778520	38.928	3	gain	6.82699e-06	1.32954e-05	6.82699e-06	Ld5
10	46622768	46626012	3.244	5	gain	0.0833165	0.270125	0.0833165	Ld5
10	68240784	68347836	107.052	3	gain	4.16851e-10	6.66188e-11	4.16851e-10	Ld5
10	68377032	68415960	38.928	3	gain	2.23138e-05	1.23883e-05	2.23138e-05	Ld5
10	76905508	76908752	3.244	9	gain	0.0832818	0.270065	0.0832818	Ld5
11	10319164	10322408	3.244	1	loss	0.0832888	0.270077	0.0832888	Ld5
11	17138052	17141296	3.244	1	loss	0.0832957	0.270089	0.0832957	Ld5
11	19532124	19535368	3.244	1	loss	0.0834241	0.270311	0.0834241	Ld5
11	31483020	31505728	22.708	1	loss	0.000532882	0.000672254	0.000532882	Ld5
11	57185232	57191720	6.488	0	loss	0.0143081	0.036636	0.0143081	Ld5
11	57691296	57694540	3.244	1	loss	0.0833477	0.270179	0.0833477	Ld5
11	57902156	57928108	25.952	3	gain	2.24088e-05	1.24267e-05	2.24088e-05	Ld5
11	62430780	62440512	9.732	0	loss	0.0143092	0.036636	0.0143092	Ld5
11	62440512	62443756	3.244	1	loss	0.0832957	0.270089	0.0832957	Ld5
12	30830976	30902344	71.368	1	loss	9.65908e-07	2.25759e-07	9.65908e-07	Ld5
12	51248712	51251956	3.244	3	gain	0.0835144	0.270468	0.0835144	Ld5
13	59141364	59147852	6.488	1	loss	0.0143206	0.0366624	0.0143206	Ld5
13	61509484	61522460	12.976	1	loss	0.0143157	0.0366459	0.0143157	Ld5
13	62297776	62304264	6.488	3	gain	0.014376	0.0367448	0.014376	Ld5
13	92093916	92097160	3.244	3	gain	0.0835144	0.270468	0.0835144	Ld5
13	96109988	96113232	3.244	1	loss	0.0832784	0.270058	0.0832784	Ld5
13	122220944	122237164	16.22	1	loss	0.000532921	0.000672072	0.000532921	Ld5
13	151825688	151828932	3.244	3	gain	0.0834275	0.270317	0.0834275	Ld5
13	172580800	172584044	3.244	7	gain	0.0832888	0.270077	0.0832888	Ld5
13	172603508	172609996	6.488	5	gain	0.0143223	0.0366558	0.0143223	Ld5
13	172749488	172752732	3.244	3	gain	0.0834414	0.270342	0.0834414	Ld5
13	176379524	176382768	3.244	1	loss	0.0832784	0.270058	0.0832784	Ld5
13	186017448	186020692	3.244	1	loss	0.0832922	0.270083	0.0832922	Ld5
13	193974980	193978224	3.244	4	gain	0.0834241	0.270311	0.0834241	Ld5
13	203353384	203356628	3.244	1	loss	0.0832957	0.270089	0.0832957	Ld5
14	16878532	16881776	3.244	1	loss	0.0832957	0.270089	0.0832957	Ld5
14	23778520	23781764	3.244	4	gain	0.0833408	0.270167	0.0833408	Ld5
14	38687944	38691188	3.244	5	gain	0.0833304	0.270149	0.0833304	Ld5
14	41263680	41266924	3.244	4	gain	0.0834171	0.270299	0.0834171	Ld5
14	102773164	102776408	3.244	1	loss	0.0833269	0.270143	0.0833269	Ld5
14	103126760	103130004	3.244	1	loss	0.0833269	0.270143	0.0833269	Ld5
14	136977900	136981144	3.244	1	loss	0.0833269	0.270143	0.0833269	Ld5
15	12849484	12852728	3.244	1	loss	0.0833477	0.270179	0.0833477	Ld5
15	18490800	18494044	3.244	3	gain	0.0834831	0.270414	0.0834831	Ld5
15	38707408	38710652	3.244	1	loss	0.0834657	0.270384	0.0834657	Ld5
15	48552948	48556192	3.244	1	loss	0.0833894	0.270251	0.0833894	Ld5
15	51751532	51754776	3.244	1	loss	0.0833304	0.270149	0.0833304	Ld5
15	56630508	56649972	19.464	0	loss	2.21038e-05	1.22967e-05	2.21038e-05	Ld5
15	60263788	60267032	3.244	1	loss	0.0833477	0.270179	0.0833477	Ld5
15	84142872	84146116	3.244	1	loss	0.0833304	0.270149	0.0833304	Ld5
15	99529164	99532408	3.244	1	loss	0.0833304	0.270149	0.0833304	Ld5
15	110182460	110218144	35.684	1	loss	0.000107881	9.14193e-05	0.000107881	Ld5
15	112647900	112651144	3.244	3	gain	0.0835491	0.270528	0.0835491	Ld5
15	120144784	120151272	6.488	1	loss	0.0146412	0.0376006	0.0146412	Ld5
15	155290280	155293524	3.244	70	gain	0.083268	0.27004	0.083268	Ld5
15	157437808	157447540	9.732	3	gain	0.0175197	0.0463729	0.0175197	Ld5
16	1106204	1112692	6.488	1	loss	0.0143163	0.0366492	0.0143163	Ld5
16	6144136	6147380	3.244	3	gain	0.083497	0.270438	0.083497	Ld5
16	7616912	7629888	12.976	3	gain	0.00271924	0.00498079	0.00271924	Ld5
16	7675304	7678548	3.244	4	gain	0.0833928	0.270257	0.0833928	Ld5
16	7698012	7707744	9.732	3	gain	0.0144686	0.0369684	0.0144686	Ld5
16	16745528	16748772	3.244	3	gain	0.0834727	0.270396	0.0834727	Ld5
16	30250300	30253544	3.244	3	gain	0.0835387	0.27051	0.0835387	Ld5
16	78433432	78436676	3.244	1	loss	0.0833269	0.270143	0.0833269	Ld5
16	81391960	81395204	3.244	0	loss	0.0832749	0.270052	0.0832749	Ld5
17	10997160	11006892	9.732	4	gain	0.0143464	0.0367168	0.0143464	Ld5
17	14497436	14500680	3.244	5	gain	0.0833304	0.270149	0.0833304	Ld5
17	17092636	17095880	3.244	4	gain	0.0833408	0.270167	0.0833408	Ld5
17	54869016	54878748	9.732	0	loss	0.00270044	0.00495867	0.00270044	Ld5
17	56121200	56124444	3.244	4	gain	0.0834171	0.270299	0.0834171	Ld5
17	61094252	61097496	3.244	1	loss	0.0832749	0.270052	0.0832749	Ld5
17	67527104	67549812	22.708	6	gain	0.000107769	9.10093e-05	0.000107769	Ld5
17	67630912	67656864	25.952	5	gain	0.000107938	9.13269e-05	0.000107938	Ld5
17	67663352	67673084	9.732	5	gain	0.00270493	0.00496604	0.00270493	Ld5
18	44329260	44332504	3.244	1	loss	0.0833061	0.270107	0.0833061	Ld5
