# Supplementary material for: A global analysis of CNVs in swine using whole genome sequence data and association analysis with fatty acid composition and growth traits
Source: PLoS One. 2017 May 4;12(5):e0177014. doi: 10.1371/journal.pone.0177014 (PMC5417718; doi:10.1371/journal.pone.0177014)
Supplement: S3 Table — (XLSX) [file pone.0177014.s007.xlsx]

## Sheet: S3 Table
S3 Table. Information of 540 identified CNVRs and gene annotation within the CNVRs retrieved from the Ensembl Genes 84 Database using the Biomart data management system.
CNVR ID	Chr.	*CNVR Start	*CNVR End	Length (kb)	Type	Ensembl Gene ID	Ensembl Transcript ID	Description	Chromosome Gene Name	Gene Start (bp)	Gene End (bp)	Associated Gene Name	Gene type	Human Ensembl Gene ID	Human Associated Gene Name	CNVR overlapping: previous studies of IBMAP population	Genes reported as differentially expressed in different tissues in IBMAP population
1	1	4171226	4191590	20.364	GAIN
2	1	6176787	6180474	3.687	LOSS
3	1	17587374	17590797	3.423	LOSS	ENSSSCG00000004092	ENSSSCT00000004523	methylenetetrahydrofolate dehydrogenase (NADP+ dependent) 1-like [Source:HGNC Symbol;Acc:HGNC:21055]	1	17550420	17655433	MTHFD1L	protein_coding	ENSG00000120254	MTHFD1L
4	1	31861676	31866266	4.59	LOSS
5	1	32870890	32874284	3.394	LOSS
6	1	48174635	48182148	7.513	LOSS
7	1	53957452	53960696	3.244	GAIN
8	1	66840588	66844344	3.756	LOSS
9	1	75932976	75936192	3.216	LOSS											Ramayo-Caldas et al., 2010
10	1	84626829	84630252	3.423	LOSS											Muñoz et al., 2014
11	1	85111338	85114732	3.394	LOSS
12	1	88215670	88219059	3.389	LOSS
13	1	90599436	91705880	1106.44	LOSS											Ramayo-Caldas et al., 2010; Fernández et al., 2014
14	1	95097120	95118324	21.204	GAIN	ENSSSCG00000004464	ENSSSCT00000004931	family with sequence similarity 46 member A [Source:HGNC Symbol;Acc:HGNC:18345]	1	95104353	95109056	FAM46A	protein_coding	ENSG00000112773	FAM46A
15	1	110627184	110630400	3.216	LOSS
16	1	119742528	119745772	3.244	LOSS
17	1	133900914	133937422	36.508	GAIN	ENSSSCG00000030168	ENSSSCT00000023689	cytochrome P450 family 19 subfamily A member 1 [Source:HGNC Symbol;Acc:HGNC:2594]	1	133903979	133936093	CYP19A1	protein_coding	ENSG00000137869	CYP19A1
18	1	140762115	140769544	7.429	LOSS
19	1	142290056	142293450	3.394	GAIN
20	1	150813957	150817380	3.423	GAIN
21	1	162198855	162202278	3.423	LOSS
22	1	172003368	172006612	3.244	LOSS											Ramayo-Caldas et al., 2010
23	1	192514468	192541620	27.152	LOSS
24	1	193446108	193453380	7.272	LOSS
25	1	198147456	198151092	3.636	LOSS
26	1	205605126	205615929	10.803	GAIN
27	1	232335288	232339664	4.376	LOSS
28	1	242516475	242520229	3.754	LOSS											Ramayo-Caldas et al., 2010
29	1	250056864	250063296	6.432	LOSS	ENSSSCG00000021646	ENSSSCT00000029337	Krueppel-like factor 9 [Source:UniProtKB/Swiss-Prot;Acc:P79288]	1	250030153	250057245	KLF9	protein_coding	ENSG00000119138	KLF9
30	1	260556297	260562971	6.674	LOSS
31	1	270831018	270834412	3.394	LOSS
32	1	271587680	271591200	3.52	GAIN	ENSSSCG00000005398	ENSSSCT00000005941		1	271586834	271591395		protein_coding
33	1	281949087	281953156	4.069	GAIN
34	1	291419022	291422416	3.394	LOSS	ENSSSCG00000005504	ENSSSCT00000006053	bone morphogenetic protein/retinoic acid inducible neural-specific 1 [Source:HGNC Symbol;Acc:HGNC:2687]	1	291412515	291465448	BRINP1	protein_coding	ENSG00000078725	BRINP1
35	1	294992904	294997474	4.57	GAIN
36	1	295244060	295251086	7.026	GAIN											Ramayo-Caldas et al., 2010; Fernández et al., 2014
37	1	295488428	295491822	3.394	GAIN											Ramayo-Caldas et al., 2010
38	1	295781669	295785006	3.337	GAIN											Ramayo-Caldas et al., 2010
39	1	296555796	296559432	3.636	LOSS
40	1	308969100	308972790	3.69	GAIN
41	1	308983644	308988686	5.042	GAIN
42	1	310491936	310501584	9.648	GAIN
43	1	312183024	313013937	830.913	GAIN	ENSSSCG00000023281	ENSSSCT00000023552		1	312186369	312187484		protein_coding
43	1	312183024	313013937	830.913	GAIN	ENSSSCG00000005794	ENSSSCT00000006370		1	312194069	312195030		protein_coding
43	1	312183024	313013937	830.913	GAIN	ENSSSCG00000005795	ENSSSCT00000006371	olfactory receptor family 10 subfamily AG member 1 [Source:HGNC Symbol;Acc:HGNC:19607]	1	312203726	312204688	OR10AG1	protein_coding	ENSG00000174970	OR10AG1
43	1	312183024	313013937	830.913	GAIN	ENSSSCG00000005796	ENSSSCT00000006372		1	312226076	312227008		protein_coding
43	1	312183024	313013937	830.913	GAIN	ENSSSCG00000005797	ENSSSCT00000006373		1	312263295	312264625		protein_coding
43	1	312183024	313013937	830.913	GAIN	ENSSSCG00000024409	ENSSSCT00000026066		1	312290104	312291048		protein_coding	ENSG00000149133	OR5F1
43	1	312183024	313013937	830.913	GAIN	ENSSSCG00000020974	ENSSSCT00000022575		1	312309919	312310863		protein_coding	ENSG00000149133	OR5F1
43	1	312183024	313013937	830.913	GAIN	ENSSSCG00000005800	ENSSSCT00000006376		1	312344575	312345542		pseudogene
43	1	312183024	313013937	830.913	GAIN	ENSSSCG00000005801	ENSSSCT00000006377		1	312359048	312359977		protein_coding	ENSG00000172154	OR8I2
43	1	312183024	313013937	830.913	GAIN	ENSSSCG00000005817	ENSSSCT00000006393		1	312377137	312378084		protein_coding	ENSG00000181761	OR8H3
43	1	312183024	313013937	830.913	GAIN	ENSSSCG00000005817	ENSSSCT00000006393		1	312377137	312378084		protein_coding	ENSG00000181767	OR8H2
43	1	312183024	313013937	830.913	GAIN	ENSSSCG00000005817	ENSSSCT00000006393		1	312377137	312378084		protein_coding	ENSG00000181693	OR8H1
43	1	312183024	313013937	830.913	GAIN	ENSSSCG00000024808	ENSSSCT00000006380		1	312400631	312401569		protein_coding
43	1	312183024	313013937	830.913	GAIN	ENSSSCG00000005805	ENSSSCT00000006381		1	312412169	312413113		protein_coding
43	1	312183024	313013937	830.913	GAIN	ENSSSCG00000024645	ENSSSCT00000006382		1	312471663	312472604		protein_coding	ENSG00000280314	OR8K3
43	1	312183024	313013937	830.913	GAIN	ENSSSCG00000024645	ENSSSCT00000006382		1	312471663	312472604		protein_coding	ENSG00000181689	OR8K3
43	1	312183024	313013937	830.913	GAIN	ENSSSCG00000022746	ENSSSCT00000024381	olfactory receptor family 8 subfamily K member 5 [Source:HGNC Symbol;Acc:HGNC:15315]	1	312483392	312484342	OR8K5	protein_coding	ENSG00000181752	OR8K5
43	1	312183024	313013937	830.913	GAIN	ENSSSCG00000005808	ENSSSCT00000006384		1	312488059	312489016		pseudogene
43	1	312183024	313013937	830.913	GAIN	ENSSSCG00000029786	ENSSSCT00000023557		1	312494393	312509726		protein_coding	ENSG00000172487	OR8J1
43	1	312183024	313013937	830.913	GAIN	ENSSSCG00000029786	ENSSSCT00000023557		1	312494393	312509726		protein_coding	ENSG00000167822	OR8J3
43	1	312183024	313013937	830.913	GAIN	ENSSSCG00000030686	ENSSSCT00000022267		1	312532571	312534566		protein_coding	ENSG00000174942	OR5R1
43	1	312183024	313013937	830.913	GAIN	ENSSSCG00000030686	ENSSSCT00000022267		1	312532571	312534566		protein_coding	ENSG00000279961	OR5R1
43	1	312183024	313013937	830.913	GAIN	ENSSSCG00000005813	ENSSSCT00000006389		1	312559736	312560693		pseudogene
43	1	312183024	313013937	830.913	GAIN	ENSSSCG00000005812	ENSSSCT00000006388		1	312571911	312573112		protein_coding	ENSG00000174937	OR5M3
43	1	312183024	313013937	830.913	GAIN	ENSSSCG00000005809	ENSSSCT00000006385		1	312609075	312610016		protein_coding	ENSG00000181371	OR5M8
43	1	312183024	313013937	830.913	GAIN	ENSSSCG00000005810	ENSSSCT00000006386		1	312635954	312636911		pseudogene
43	1	312183024	313013937	830.913	GAIN	ENSSSCG00000029133	ENSSSCT00000006392		1	312728407	312729369		protein_coding	ENSG00000280314	OR8K3
43	1	312183024	313013937	830.913	GAIN	ENSSSCG00000029133	ENSSSCT00000006392		1	312728407	312729369		protein_coding	ENSG00000181689	OR8K3
43	1	312183024	313013937	830.913	GAIN	ENSSSCG00000005802	ENSSSCT00000006378		1	312738876	312741358		protein_coding	ENSG00000181761	OR8H3
43	1	312183024	313013937	830.913	GAIN	ENSSSCG00000005802	ENSSSCT00000006378		1	312738876	312741358		protein_coding	ENSG00000181767	OR8H2
43	1	312183024	313013937	830.913	GAIN	ENSSSCG00000005802	ENSSSCT00000006378		1	312738876	312741358		protein_coding	ENSG00000181693	OR8H1
43	1	312183024	313013937	830.913	GAIN	ENSSSCG00000027333	ENSSSCT00000024444		1	312751494	312753489		protein_coding	ENSG00000174942	OR5R1
43	1	312183024	313013937	830.913	GAIN	ENSSSCG00000027333	ENSSSCT00000024444		1	312751494	312753489		protein_coding	ENSG00000279961	OR5R1
43	1	312183024	313013937	830.913	GAIN	ENSSSCG00000005820	ENSSSCT00000006397		1	312773962	312775359		protein_coding	ENSG00000181718	OR5T2
43	1	312183024	313013937	830.913	GAIN	ENSSSCG00000027284	ENSSSCT00000029037		1	312789943	312790881		protein_coding
43	1	312183024	313013937	830.913	GAIN	ENSSSCG00000005821	ENSSSCT00000006398		1	312969936	312972295		protein_coding
44	1	313048692	313085052	36.36	GAIN
45	1	313105233	313108656	3.423	GAIN
46	2	8697164	8702216	5.052	GAIN	ENSSSCG00000013067	ENSSSCT00000014283		2	8697657	8703590	PHEROC	protein_coding	ENSG00000110484	SCGB2A2
46	2	8697164	8702216	5.052	GAIN	ENSSSCG00000013067	ENSSSCT00000014283		2	8697657	8703590	PHEROC	protein_coding	ENSG00000124939	SCGB2A1
47	2	11439236	11443089	3.853	GAIN	ENSSSCG00000020968	ENSSSCT00000014348	olfactory receptor family 4 subfamily D member 11 [Source:HGNC Symbol;Acc:HGNC:15174]	2	11438532	11439467	OR4D11	protein_coding	ENSG00000176200	OR4D11
48	2	11457036	11462595	5.559	GAIN	ENSSSCG00000024524	ENSSSCT00000014350		2	11456394	11457329		protein_coding
49	2	11651602	11655315	3.713	GAIN
50	2	11699814	11703237	3.423	LOSS
51	2	11747916	11760210	12.294	GAIN	ENSSSCG00000022662	ENSSSCT00000014363		2	11751050	11753474		protein_coding
52	2	12065670	12069064	3.394	GAIN	ENSSSCG00000013150	ENSSSCT00000014370		2	12057667	12070449		protein_coding
53	2	12757521	12760944	3.423	GAIN	ENSSSCG00000013173	ENSSSCT00000014393		2	12759518	12760462		protein_coding
54	2	13540464	13544100	3.636	GAIN											Ramayo-Caldas et al., 2010
55	2	13763883	13769532	5.649	GAIN											Ramayo-Caldas et al., 2010
56	2	13842252	13847520	5.268	GAIN											Ramayo-Caldas et al., 2010
57	2	14008896	14020416	11.52	GAIN											Ramayo-Caldas et al., 2010
58	2	14913236	15153792	240.556	GAIN	ENSSSCG00000028386	ENSSSCT00000015876		2	14943686	14944618		protein_coding	ENSG00000172188	OR4C11
58	2	14913236	15153792	240.556	GAIN	ENSSSCG00000021499	ENSSSCT00000015875		2	14957207	14958139		protein_coding	ENSG00000172188	OR4C11
58	2	14913236	15153792	240.556	GAIN	ENSSSCG00000026299	ENSSSCT00000028032		2	15004879	15005811		protein_coding	ENSG00000279514	OR4C16
58	2	14913236	15153792	240.556	GAIN	ENSSSCG00000026299	ENSSSCT00000028032		2	15004879	15005811		protein_coding	ENSG00000181935	OR4C16
58	2	14913236	15153792	240.556	GAIN	ENSSSCG00000025884	ENSSSCT00000027620		2	15022431	15023363		protein_coding	ENSG00000279514	OR4C16
58	2	14913236	15153792	240.556	GAIN	ENSSSCG00000025884	ENSSSCT00000027620		2	15022431	15023363		protein_coding	ENSG00000181935	OR4C16
58	2	14913236	15153792	240.556	GAIN	ENSSSCG00000030330	ENSSSCT00000023161		2	15043603	15044923		protein_coding	ENSG00000258817	OR4C13
58	2	14913236	15153792	240.556	GAIN	ENSSSCG00000030330	ENSSSCT00000023161		2	15043603	15044923		protein_coding	ENSG00000185926	OR4C46
58	2	14913236	15153792	240.556	GAIN	ENSSSCG00000020684	ENSSSCT00000015864		2	15123364	15124293		protein_coding
58	2	14913236	15153792	240.556	GAIN	ENSSSCG00000014515	ENSSSCT00000015865		2	15135896	15136925		protein_coding
58	2	14913236	15153792	240.556	GAIN	ENSSSCG00000014516	ENSSSCT00000015866		2	15149257	15150192		protein_coding
59	2	15201726	15205248	3.522	GAIN
60	2	15362337	15382671	20.334	GAIN	ENSSSCG00000021908	ENSSSCT00000015860		2	15369768	15370700		protein_coding
61	2	15391188	15406394	15.206	GAIN	ENSSSCG00000027805	ENSSSCT00000023440		2	15400277	15401209		protein_coding	ENSG00000279514	OR4C16
61	2	15391188	15406394	15.206	GAIN	ENSSSCG00000027805	ENSSSCT00000023440		2	15400277	15401209		protein_coding	ENSG00000181935	OR4C16
62	2	15477563	15504675	27.112	GAIN	ENSSSCG00000024280	ENSSSCT00000014429		2	15490567	15491496		protein_coding
63	2	24410155	24416829	6.674	LOSS											Ramayo-Caldas et al., 2012b
64	2	24654016	24664198	10.182	LOSS											Ramayo-Caldas et al., 2012b
65	2	28523859	28527282	3.423	LOSS
66	2	38342018	38358988	16.97	LOSS
67	2	43039332	43042968	3.636	LOSS
68	2	53668608	53696474	27.866	GAIN	ENSSSCG00000014467	ENSSSCT00000015816		2	53672049	53672978		protein_coding	ENSG00000181718	OR5T2
69	2	55399983	55411680	11.697	LOSS
70	2	55627152	55860887	233.735	GAIN	ENSSSCG00000028473	ENSSSCT00000030271		2	55632537	55633517		protein_coding	ENSG00000177462	OR2T8
70	2	55627152	55860887	233.735	GAIN	ENSSSCG00000028473	ENSSSCT00000030271		2	55632537	55633517		protein_coding	ENSG00000177212	OR2T33
70	2	55627152	55860887	233.735	GAIN	ENSSSCG00000028473	ENSSSCT00000030271		2	55632537	55633517		protein_coding	ENSG00000177201	OR2T12
70	2	55627152	55860887	233.735	GAIN	ENSSSCG00000013969	ENSSSCT00000015257	olfactory receptor family 2 subfamily L member 13 [Source:HGNC Symbol;Acc:HGNC:19578]	2	55656567	55657505	OR2L13	protein_coding	ENSG00000196071	OR2L13
70	2	55627152	55860887	233.735	GAIN	ENSSSCG00000027463	ENSSSCT00000027496		2	55677713	55678724		protein_coding	ENSG00000196936	OR2L8
70	2	55627152	55860887	233.735	GAIN	ENSSSCG00000027463	ENSSSCT00000027496		2	55677713	55678724		protein_coding	ENSG00000279263	OR2L8
70	2	55627152	55860887	233.735	GAIN	ENSSSCG00000027463	ENSSSCT00000027496		2	55677713	55678724		protein_coding	ENSG00000198128	OR2L3
70	2	55627152	55860887	233.735	GAIN	ENSSSCG00000027463	ENSSSCT00000027496		2	55677713	55678724		protein_coding	ENSG00000197454	OR2L5
70	2	55627152	55860887	233.735	GAIN	ENSSSCG00000027463	ENSSSCT00000027496		2	55677713	55678724		protein_coding	ENSG00000203663	OR2L2
70	2	55627152	55860887	233.735	GAIN	ENSSSCG00000028648	ENSSSCT00000030449		2	55709785	55710723		protein_coding	ENSG00000196936	OR2L8
70	2	55627152	55860887	233.735	GAIN	ENSSSCG00000028648	ENSSSCT00000030449		2	55709785	55710723		protein_coding	ENSG00000279263	OR2L8
70	2	55627152	55860887	233.735	GAIN	ENSSSCG00000028648	ENSSSCT00000030449		2	55709785	55710723		protein_coding	ENSG00000198128	OR2L3
70	2	55627152	55860887	233.735	GAIN	ENSSSCG00000028648	ENSSSCT00000030449		2	55709785	55710723		protein_coding	ENSG00000197454	OR2L5
70	2	55627152	55860887	233.735	GAIN	ENSSSCG00000028648	ENSSSCT00000030449		2	55709785	55710723		protein_coding	ENSG00000203663	OR2L2
71	2	57025988	57029382	3.394	LOSS
72	2	57673371	57677636	4.265	GAIN
73	2	61349944	61356732	6.788	GAIN	ENSSSCG00000013842	ENSSSCT00000015120		2	61344295	61358739		protein_coding	ENSG00000171903	CYP4F11
73	2	61349944	61356732	6.788	GAIN	ENSSSCG00000013842	ENSSSCT00000015120		2	61344295	61358739		protein_coding	ENSG00000186526	CYP4F8
73	2	61349944	61356732	6.788	GAIN	ENSSSCG00000013842	ENSSSCT00000015120		2	61344295	61358739		protein_coding	ENSG00000186204	CYP4F12
73	2	61349944	61356732	6.788	GAIN	ENSSSCG00000013842	ENSSSCT00000015120		2	61344295	61358739		protein_coding	ENSG00000186115	CYP4F2
74	2	62615164	62652443	37.279	GAIN
74	2	62615164	62652443	37.279	GAIN	ENSSSCG00000013821	ENSSSCT00000015099		2	62624616	62625548		protein_coding	ENSG00000188269	OR7A5
74	2	62615164	62652443	37.279	GAIN	ENSSSCG00000013821	ENSSSCT00000015099		2	62624616	62625548		protein_coding	ENSG00000127515	OR7A10
74	2	62615164	62652443	37.279	GAIN	ENSSSCG00000013821	ENSSSCT00000015099		2	62624616	62625548		protein_coding	ENSG00000185385	OR7A17
75	2	62832060	62839524	7.464	GAIN	ENSSSCG00000013822	ENSSSCT00000015100		2	62644870	62645796		protein_coding	ENSG00000188269	OR7A5
75	2	62832060	62839524	7.464	GAIN	ENSSSCG00000013822	ENSSSCT00000015100		2	62644870	62645796		protein_coding	ENSG00000127515	OR7A10
75	2	62832060	62839524	7.464	GAIN	ENSSSCG00000013822	ENSSSCT00000015100		2	62644870	62645796		protein_coding	ENSG00000185385	OR7A17
76	2	64536136	64539380	3.244	GAIN	ENSSSCG00000013788	ENSSSCT00000015065		2	64438136	64538453		protein_coding	ENSG00000127507	ADGRE2
77	2	64604320	64608184	3.864	GAIN
78	2	67991049	67994472	3.423	GAIN
79	2	68007744	68011380	3.636	GAIN
80	2	68114844	68120460	5.616	GAIN
81	2	68188848	68192064	3.216	GAIN
82	2	68661600	68664816	3.216	GAIN
83	2	95623164	95626800	3.636	LOSS	ENSSSCG00000014139	ENSSSCT00000015443	arylsulfatase family member K [Source:HGNC Symbol;Acc:HGNC:25239]	2	95606107	95651949	ARSK	protein_coding	ENSG00000164291	ARSK
84	2	104542272	104545908	3.636	LOSS
85	2	109343479	109347892	4.413	LOSS
86	2	110712280	110715674	3.394	LOSS
87	2	114781686	114808838	27.152	LOSS
88	2	116301124	116311135	10.011	LOSS
89	2	116621064	116628336	7.272	GAIN
90	2	122856804	122860440	3.636	LOSS
91	2	126714990	126721778	6.788	LOSS
92	2	133651035	133657881	6.846	LOSS
93	2	141734916	141738552	3.636	LOSS
94	2	158551416	158612136	60.72	GAIN	ENSSSCG00000014452	ENSSSCT00000015800		2	158558893	158560345		protein_coding
94	2	158551416	158612136	60.72	GAIN	ENSSSCG00000022608	ENSSSCT00000022753		2	158569526	158570431		pseudogene
94	2	158551416	158612136	60.72	GAIN	ENSSSCG00000014453	ENSSSCT00000015801		2	158574719	158575657		protein_coding
94	2	158551416	158612136	60.72	GAIN	ENSSSCG00000014454	ENSSSCT00000015802		2	158586559	158587488		protein_coding
95	2	158614974	159025436	410.462	GAIN	ENSSSCG00000014456	ENSSSCT00000015804		2	158620781	158621734		protein_coding
95	2	158614974	159025436	410.462	GAIN	ENSSSCG00000014457	ENSSSCT00000015805		2	158629441	158630382		protein_coding	ENSG00000279761	OR5D13
95	2	158614974	159025436	410.462	GAIN	ENSSSCG00000014457	ENSSSCT00000015805		2	158629441	158630382		protein_coding	ENSG00000198877	OR5D13
95	2	158614974	159025436	410.462	GAIN	ENSSSCG00000014458	ENSSSCT00000015806	olfactory receptor family 5 subfamily D member 18 [Source:HGNC Symbol;Acc:HGNC:15285]	2	158668902	158669843	OR5D18	protein_coding	ENSG00000186119	OR5D18
95	2	158614974	159025436	410.462	GAIN	ENSSSCG00000014459	ENSSSCT00000015807		2	158676090	158677251		protein_coding	ENSG00000205030	OR5L2
95	2	158614974	159025436	410.462	GAIN	ENSSSCG00000014459	ENSSSCT00000015807		2	158676090	158677251		protein_coding	ENSG00000186117	OR5L1
95	2	158614974	159025436	410.462	GAIN	ENSSSCG00000014459	ENSSSCT00000015807		2	158676090	158677251		protein_coding	ENSG00000279395	OR5L1
95	2	158614974	159025436	410.462	GAIN	ENSSSCG00000014460	ENSSSCT00000015808	olfactory receptor family 5 subfamily D member 16 [Source:HGNC Symbol;Acc:HGNC:15283]	2	158684024	158684959	OR5D16	protein_coding	ENSG00000205029	OR5D16
95	2	158614974	159025436	410.462	GAIN	ENSSSCG00000014461	ENSSSCT00000015809		2	158693296	158694207		protein_coding
95	2	158614974	159025436	410.462	GAIN	ENSSSCG00000014462	ENSSSCT00000015810		2	158698922	158701046		protein_coding
95	2	158614974	159025436	410.462	GAIN	ENSSSCG00000014463	ENSSSCT00000015812		2	158709851	158710780		protein_coding	ENSG00000187612	OR5W2
95	2	158614974	159025436	410.462	GAIN	ENSSSCG00000014464	ENSSSCT00000015813		2	158720990	158721925		protein_coding
95	2	158614974	159025436	410.462	GAIN	ENSSSCG00000028285	ENSSSCT00000030076		2	158734175	158735107		protein_coding	ENSG00000187612	OR5W2
95	2	158614974	159025436	410.462	GAIN	ENSSSCG00000014544	ENSSSCT00000015894		2	158743369	158745100		protein_coding	ENSG00000187612	OR5W2
95	2	158614974	159025436	410.462	GAIN	ENSSSCG00000030308	ENSSSCT00000023728		2	158755249	158756062		pseudogene
95	2	158614974	159025436	410.462	GAIN	ENSSSCG00000029018	ENSSSCT00000030853		2	158759307	158760251		protein_coding	ENSG00000149133	OR5F1
95	2	158614974	159025436	410.462	GAIN	ENSSSCG00000029734	ENSSSCT00000025416	olfactory receptor family 5 subfamily I member 1 [Source:HGNC Symbol;Acc:HGNC:8347]	2	158792402	158793346	OR5I1	protein_coding	ENSG00000167825	OR5I1
95	2	158614974	159025436	410.462	GAIN	ENSSSCG00000027048	ENSSSCT00000028803		2	158807843	158808787		protein_coding
95	2	158614974	159025436	410.462	GAIN	ENSSSCG00000025070	ENSSSCT00000026781		2	158821279	158822223		protein_coding
95	2	158614974	159025436	410.462	GAIN	ENSSSCG00000030464	ENSSSCT00000032322		2	158829553	158830533		protein_coding
95	2	158614974	159025436	410.462	GAIN	ENSSSCG00000028824	ENSSSCT00000030651		2	158845292	158846236		protein_coding	ENSG00000149133	OR5F1
95	2	158614974	159025436	410.462	GAIN	ENSSSCG00000029068	ENSSSCT00000030899		2	158853148	158854074		protein_coding	ENSG00000149133	OR5F1
95	2	158614974	159025436	410.462	GAIN	ENSSSCG00000025350	ENSSSCT00000025351		2	158860682	158862297		protein_coding	ENSG00000149133	OR5F1
95	2	158614974	159025436	410.462	GAIN	ENSSSCG00000025526	ENSSSCT00000027227	olfactory receptor family 5 subfamily AS member 1 [Source:HGNC Symbol;Acc:HGNC:15261]	2	158899472	158900449	OR5AS1	protein_coding	ENSG00000181785	OR5AS1
95	2	158614974	159025436	410.462	GAIN	ENSSSCG00000030332	ENSSSCT00000015817		2	158915646	158916593		protein_coding	ENSG00000181761	OR8H3
95	2	158614974	159025436	410.462	GAIN	ENSSSCG00000030332	ENSSSCT00000015817		2	158915646	158916593		protein_coding	ENSG00000181767	OR8H2
95	2	158614974	159025436	410.462	GAIN	ENSSSCG00000030332	ENSSSCT00000015817		2	158915646	158916593		protein_coding	ENSG00000181693	OR8H1
95	2	158614974	159025436	410.462	GAIN	ENSSSCG00000025951	ENSSSCT00000027681		2	158924406	158925338		protein_coding	ENSG00000172154	OR8I2
95	2	158614974	159025436	410.462	GAIN	ENSSSCG00000027945	ENSSSCT00000032064		2	158976501	158977438		pseudogene
95	2	158614974	159025436	410.462	GAIN	ENSSSCG00000021605	ENSSSCT00000015818		2	158985405	158986352		protein_coding	ENSG00000181761	OR8H3
95	2	158614974	159025436	410.462	GAIN	ENSSSCG00000021605	ENSSSCT00000015818		2	158985405	158986352		protein_coding	ENSG00000181767	OR8H2
95	2	158614974	159025436	410.462	GAIN	ENSSSCG00000021605	ENSSSCT00000015818		2	158985405	158986352		protein_coding	ENSG00000181693	OR8H1
95	2	158614974	159025436	410.462	GAIN	ENSSSCG00000027258	ENSSSCT00000023263		2	158992126	158993565		protein_coding	ENSG00000181718	OR5T2
95	2	158614974	159025436	410.462	GAIN	ENSSSCG00000022552	ENSSSCT00000030828		2	159008934	159010668		protein_coding
96	2	159507684	159511937	4.253	LOSS
97	2	160123840	160127084	3.244	GAIN
98	2	160239403	160246077	6.674	GAIN
99	2	160408148	160413048	4.9	GAIN
100	2	160416684	160434864	18.18	GAIN
101	2	160516364	160583716	67.352	GAIN
102	2	161143884	161161686	17.802	GAIN
103	2	161502540	161518392	15.852	GAIN	ENSSSCG00000029373	ENSSSCT00000031215	olfactory receptor family 2 subfamily T member 1 [Source:HGNC Symbol;Acc:HGNC:8277]	2	161501749	161502693	OR2T1	protein_coding	ENSG00000175143	OR2T1
104	2	161609292	161612928	3.636	GAIN
105	2	161724100	161731042	6.942	GAIN
106	2	161856466	161873436	16.97	GAIN	ENSSSCG00000014553	ENSSSCT00000015903		2	161868269	161869222		protein_coding	ENSG00000196539	OR2T3
106	2	161856466	161873436	16.97	GAIN	ENSSSCG00000014553	ENSSSCT00000015903		2	161868269	161869222		protein_coding	ENSG00000183310	OR2T34
107	3	4904400	4907616	3.216	LOSS	ENSSSCG00000021285	ENSSSCT00000029070		3	4800910	4962104		protein_coding	ENSG00000011275	RNF216
108	3	6069524	6072768	3.244	GAIN	ENSSSCG00000007606	ENSSSCT00000026054	transformation/transcription domain-associated protein [Source:HGNC Symbol;Acc:HGNC:12347]	3	5993865	6087744	TRRAP	protein_coding	ENSG00000196367	TRRAP
109	3	22317768	22321404	3.636	GAIN
110	3	38301624	38305776	4.152	GAIN	ENSSSCG00000007922	ENSSSCT00000008682		3	38281492	38305772		protein_coding
111	3	45373189	45382134	8.945	GAIN
112	3	48486060	48496968	10.908	GAIN	ENSSSCG00000008120	ENSSSCT00000008896		3	48458585	48487147		protein_coding	ENSG00000144199	FAHD2B
112	3	48486060	48496968	10.908	GAIN	ENSSSCG00000008120	ENSSSCT00000008896		3	48458585	48487147		protein_coding	ENSG00000115042	FAHD2A
112	3	48486060	48496968	10.908	GAIN	ENSSSCG00000008121	ENSSSCT00000032292	glycerol-3-phosphate acyltransferase 2, mitochondrial [Source:HGNC Symbol;Acc:HGNC:27168]	3	48487404	48497055	GPAT2	protein_coding	ENSG00000186281	GPAT2
113	3	48689676	48693312	3.636	GAIN	ENSSSCG00000028944	ENSSSCT00000031771		3	48686821	48699096		protein_coding
114	3	51430575	51433998	3.423	GAIN
115	3	54581952	54585168	3.216	LOSS
116	3	64631942	64635336	3.394	LOSS											Ramayo-Caldas et al., 2010
117	3	69394479	69397902	3.423	GAIN
118	3	69400332	69403968	3.636	GAIN
119	3	75035712	75038928	3.216	LOSS
120	3	95310308	95328079	17.771	LOSS
121	3	95976984	95983472	6.488	LOSS
122	3	100326336	100395312	68.976	GAIN
123	3	100400304	100403520	3.216	GAIN
124	3	101110654	101117442	6.788	LOSS	ENSSSCG00000008445	ENSSSCT00000009247	S1 RNA binding domain 1 [Source:HGNC Symbol;Acc:HGNC:25521]	3	101017493	101209095	SRBD1	protein_coding	ENSG00000068784	SRBD1
125	3	113515152	113554773	39.621	GAIN
126	3	120384528	120390960	6.432	GAIN	ENSSSCG00000008576	ENSSSCT00000009384		3	120246445	120418112		protein_coding	ENSG00000138101	DTNB
127	3	120431592	120435228	3.636	GAIN
128	3	132422016	132428448	6.432	LOSS
129	3	139109519	139113272	3.753	LOSS
130	3	144390440	144430560	40.12	mixed	ENSSSCG00000008671	ENSSSCT00000009488		3	144411266	144412002		protein_coding	ENSG00000100804	PSMB5
131	3	144773232	144786208	12.976	mixed
132	4	4622628	4626022	3.394	LOSS
133	4	9804106	9807443	3.337	LOSS
134	4	15703884	15708147	4.263	LOSS	ENSSSCG00000005975	ENSSSCT00000006558	metastasis suppressor 1 [Source:HGNC Symbol;Acc:HGNC:20443]	4	15698066	15757625	MTSS1	protein_coding	ENSG00000170873	MTSS1
135	4	25942917	25946340	3.423	LOSS
136	4	30019976	30032952	12.976	LOSS
137	4	34851060	34854696	3.636	LOSS
138	4	50943776	50953508	9.732	GAIN
139	4	50995680	50999371	3.691	GAIN
140	4	52593424	52596818	3.394	LOSS
141	4	56778226	56785014	6.788	LOSS											Ramayo-Caldas et al., 2012b
142	4	59493426	59496820	3.394	LOSS											Ramayo-Caldas et al., 2012b
143	4	72162625	72287370	124.745	LOSS
144	4	77096904	77144766	47.862	LOSS	ENSSSCG00000006223	ENSSSCT00000006819		4	77133699	77137306		protein_coding
145	4	81776448	81802176	25.728	LOSS
146	4	96894861	96899806	4.945	GAIN	ENSSSCG00000006350	ENSSSCT00000034134		4	96888986	96908203	FCGR2B	protein_coding	ENSG00000244682	FCGR2C	Muñoz et al., 2014
146	4	96894861	96899806	4.945	GAIN	ENSSSCG00000006350	ENSSSCT00000034134		4	96888986	96908203	FCGR2B	protein_coding	ENSG00000143226	FCGR2A	Muñoz et al., 2014
146	4	96894861	96899806	4.945	GAIN	ENSSSCG00000006350	ENSSSCT00000034134		4	96888986	96908203	FCGR2B	protein_coding	ENSG00000072694	FCGR2B	Muñoz et al., 2014
147	4	99461170	99464564	3.394	GAIN
148	4	108712342	108723672	11.33	GAIN											Ramayo-Caldas et al., 2012b
149	4	108899322	108902995	3.673	GAIN											Ramayo-Caldas et al., 2012b
150	4	110227876	110231616	3.74	GAIN
151	4	111407040	111420153	13.113	GAIN	ENSSSCG00000006716	ENSSSCT00000007357	Hydroxymethylglutaryl-CoA synthase, mitochondrial [Source:UniProtKB/Swiss-Prot;Acc:O02734]	4	111411282	111430642	HMGCS2	protein_coding	ENSG00000134240	HMGCS2
152	4	113335056	113341488	6.432	LOSS	ENSSSCG00000006730	ENSSSCT00000007372	mannosidase, alpha, class 1A, member 2 [Source:HGNC Symbol;Acc:HGNC:6822]	4	113184591	113342908	MAN1A2	protein_coding	ENSG00000198162	MAN1A2
153	4	122798628	122802264	3.636	GAIN	ENSSSCG00000006851	ENSSSCT00000007504		4	122656458	122879785		protein_coding	ENSG00000134215	VAV3
154	4	122954976	122958612	3.636	LOSS	ENSSSCG00000023187	ENSSSCT00000032777		4	122938281	122967693	VAV3	protein_coding	ENSG00000134215	VAV3
155	4	124695560	124700353	4.793	LOSS
156	4	126504576	126507792	3.216	LOSS
157	4	141944876	142127882	183.006	GAIN	ENSSSCG00000006931	ENSSSCT00000007593		4	142051733	142055214		protein_coding	ENSG00000016602	CLCA4	Ramayo-Caldas et al., 2010
157	4	141944876	142127882	183.006	GAIN	ENSSSCG00000006932	ENSSSCT00000007594		4	142080450	142110266	CLCA4	protein_coding	ENSG00000016602	CLCA4		Puig-Oliveras et al., 2014
158	5	13282308	13285944	3.636	LOSS
159	5	20800528	20816748	16.22	GAIN
160	5	21244896	21284214	39.318	GAIN	ENSSSCG00000026447	ENSSSCT00000022877		5	21256500	21258129		protein_coding	ENSG00000188324	OR6C6
160	5	21244896	21284214	39.318	GAIN	ENSSSCG00000024451	ENSSSCT00000026114		5	21266917	21267855		protein_coding
160	5	21244896	21284214	39.318	GAIN	ENSSSCG00000021160	ENSSSCT00000022768		5	21279720	21280679		protein_coding
161	5	21974145	21977482	3.337	GAIN
162	5	21990830	21994610	3.78	GAIN
163	5	22016736	22020863	4.127	GAIN
164	5	22187886	22203548	15.662	GAIN	ENSSSCG00000000338	ENSSSCT00000000360		5	22194967	22196087		protein_coding			Fernández et al., 2014
165	5	22441128	22444662	3.534	mixed											Fernández et al., 2014
166	5	26715487	26901882	186.395	LOSS	ENSSSCG00000000456	ENSSSCT00000000492	solute carrier family 16 (monocarboxylate transporter), member 7 [Source:HGNC Symbol;Acc:HGNC:10928]	5	26810232	26867980	SLC16A7	protein_coding	ENSG00000118596	SLC16A7	Ramayo-Caldas et al., 2010
167	5	33008860	33020676	11.816	GAIN
168	5	33072580	33079068	6.488	GAIN	ENSSSCG00000026004	ENSSSCT00000028225	methionine sulfoxide reductase B3 [Source:HGNC Symbol;Acc:HGNC:27375]	5	33031837	33088198	MSRB3	protein_coding	ENSG00000174099	MSRB3
169	5	33969852	33973275	3.423	GAIN	ENSSSCG00000000478	ENSSSCT00000033391	glutamate receptor interacting protein 1 [Source:HGNC Symbol;Acc:HGNC:18708]	5	33972886	34295641	GRIP1	protein_coding	ENSG00000155974	GRIP1
170	5	47828248	47831642	3.394	LOSS	ENSSSCG00000000541	ENSSSCT00000000584	fatty acyl-CoA reductase 2 [Source:HGNC Symbol;Acc:HGNC:25531]	5	47705577	47904532	FAR2	protein_coding	ENSG00000064763	FAR2
171	5	47832558	47835895	3.337	LOSS
172	5	65989764	65993400	3.636	GAIN	ENSSSCG00000030876	ENSSSCT00000036641		5	65897893	66089156	RBP5	protein_coding	ENSG00000139194	RBP5
172	5	65989764	65993400	3.636	GAIN	ENSSSCG00000026009	ENSSSCT00000028566		5	65984979	66021167		protein_coding	ENSG00000177675	CD163L1
173	5	66017720	66045904	28.184	GAIN	ENSSSCG00000030876	ENSSSCT00000036641		5	65897893	66089156	RBP5	protein_coding
173	5	66017720	66045904	28.184	GAIN	ENSSSCG00000026009	ENSSSCT00000028566		5	65984979	66021167		protein_coding
173	5	66017720	66045904	28.184	GAIN	ENSSSCG00000025680	ENSSSCT00000031826		5	66031752	66046894		protein_coding	ENSG00000177675	CD163L1
174	5	66046785	66050208	3.423	GAIN	ENSSSCG00000030876	ENSSSCT00000036641		5	65897893	66089156	RBP5	protein_coding
174	5	66046785	66050208	3.423	GAIN	ENSSSCG00000025680	ENSSSCT00000031826		5	66031752	66046894		protein_coding
175	5	66050634	66054028	3.394	GAIN	ENSSSCG00000030876	ENSSSCT00000036641		5	65897893	66089156	RBP5	protein_coding
176	5	77755437	77758774	3.337	GAIN											Ramayo-Caldas et al., 2012b; Fernández et al., 2012
177	5	86362272	86365908	3.636	GAIN	ENSSSCG00000000862	ENSSSCT00000028915		5	86352832	86413187		protein_coding	ENSG00000111670	GNPTAB
178	5	94452304	94461108	8.804	GAIN	ENSSSCG00000000912	ENSSSCT00000000996	early endosome antigen 1 [Source:HGNC Symbol;Acc:HGNC:3185]	5	94406462	94492337	EEA1	protein_coding	ENSG00000102189	EEA1
179	5	98250369	98259264	8.895	GAIN
180	5	105062220	105065856	3.636	LOSS	ENSSSCG00000000940	ENSSSCT00000001028		5	105054245	105191159		protein_coding	ENSG00000139220	PPFIA2
181	5	107694192	107698408	4.216	LOSS
182	6	12864	16970	4.106	GAIN
183	6	94892	98426	3.534	GAIN
184	6	1696612	1700394	3.782	LOSS
185	6	11838096	11841312	3.216	LOSS
186	6	12062276	12066592	4.316	LOSS
187	6	21054873	21059807	4.934	LOSS
188	6	22312156	22315824	3.668	LOSS
189	6	34265664	34269300	3.636	LOSS
190	6	42240496	42245376	4.88	GAIN	ENSSSCG00000029408	ENSSSCT00000024936	ZFP30 zinc finger protein [Source:HGNC Symbol;Acc:HGNC:29555]	6	42163691	42305388	ZFP30	protein_coding	ENSG00000120784	ZFP30
191	6	44955352	44959680	4.328	GAIN	ENSSSCG00000003006	ENSSSCT00000003339	cytochrome P450 family 2 subfamily B member 6 [Source:HGNC Symbol;Acc:HGNC:2615]	6	44929854	44978800	CYP2B6	protein_coding	ENSG00000197408	CYP2B6
191	6	44955352	44959680	4.328	GAIN	ENSSSCG00000028298	ENSSSCT00000029652		6	44951366	44955641		protein_coding
192	6	44967106	44970500	3.394	GAIN	ENSSSCG00000003006	ENSSSCT00000003339	cytochrome P450 family 2 subfamily B member 6 [Source:HGNC Symbol;Acc:HGNC:2615]	6	44929854	44978800	CYP2B6	protein_coding
193	6	45382099	45386804	4.705	GAIN
194	6	55907859	55911282	3.423	GAIN
195	6	56434368	56437584	3.216	GAIN
196	6	56924490	56927913	3.423	GAIN	ENSSSCG00000003987	ENSSSCT00000004409	zinc finger and SCAN domain containing 4 [Source:HGNC Symbol;Acc:HGNC:23709]	6	56926564	56928631	ZSCAN4	protein_coding	ENSG00000180532	ZSCAN4
197	6	60968928	60972144	3.216	LOSS
198	6	72514368	72520800	6.432	GAIN	ENSSSCG00000003494	ENSSSCT00000003882	phospholipase A2 group IIA [Source:HGNC Symbol;Acc:HGNC:9031]	6	72517360	72520303	PLA2G2A	protein_coding	ENSG00000188257	PLA2G2A
199	6	80708292	80722030	13.738	GAIN
200	6	90591504	90594720	3.216	LOSS	ENSSSCG00000024151	ENSSSCT00000022819	spire-type actin nucleation factor 1 [Source:HGNC Symbol;Acc:HGNC:30622]	6	90571462	90592504	SPIRE1	protein_coding	ENSG00000134278	SPIRE1
201	6	91513888	91517712	3.824	LOSS
202	6	95364780	95370480	5.7	LOSS
203	6	97961112	97982928	21.816	LOSS
204	6	103029440	103032684	3.244	LOSS
205	6	107514096	107624924	110.828	LOSS
206	6	118137999	118142976	4.977	LOSS
207	6	118172292	118175686	3.394	LOSS
208	6	118616906	118630482	13.576	LOSS
209	6	118908108	118911744	3.636	GAIN
210	6	127089108	127097667	8.559	LOSS
211	6	129957912	129976092	18.18	LOSS
212	6	130376052	130386960	10.908	LOSS
213	6	131914598	131917992	3.394	LOSS
214	6	151988436	151995708	7.272	GAIN	ENSSSCG00000024778	ENSSSCT00000024887	cytochrome P450 4A24 [Source:RefSeq peptide;Acc:NP_999589]	6	151929629	152153725	CYP4A24	protein_coding	ENSG00000162365	CYP4A22
214	6	151988436	151995708	7.272	GAIN	ENSSSCG00000024778	ENSSSCT00000024887	cytochrome P450 4A24 [Source:RefSeq peptide;Acc:NP_999589]	6	151929629	152153725	CYP4A24	protein_coding	ENSG00000187048	CYP4A11
214	6	151988436	151995708	7.272	GAIN	ENSSSCG00000024129	ENSSSCT00000022260	cytochrome P450 family 4 subfamily X member 1 [Source:HGNC Symbol;Acc:HGNC:20244]	6	151954326	152007678	CYP4X1	protein_coding	ENSG00000186377	CYP4X1		Ramayo-Caldas et al., 2012
215	6	154462875	154537672	74.797	GAIN	ENSSSCG00000003935	ENSSSCT00000004352	ERI1 exoribonuclease family member 3 [Source:HGNC Symbol;Acc:HGNC:17276]	6	154509350	154567935	ERI3	protein_coding	ENSG00000117419	ERI3
215	6	154462875	154537672	74.797	GAIN	ENSSSCG00000020190	ENSSSCT00000021785		6	154529059	154529132		miRNA
216	6	156289432	156292676	3.244	GAIN	ENSSSCG00000003965	ENSSSCT00000004386	coiled-coil domain containing 30 [Source:HGNC Symbol;Acc:HGNC:26103]	6	156246761	156329909	CCDC30	protein_coding	ENSG00000186409	CCDC30
217	7	15851913	15855336	3.423	GAIN
218	7	19267738	19271132	3.394	LOSS
219	7	23985398	23988792	3.394	LOSS	ENSSSCG00000021069	ENSSSCT00000026384		7	23970367	23993147		protein_coding
220	7	25380332	25393908	13.576	GAIN	ENSSSCG00000001255	ENSSSCT00000001370		7	25382745	25383668		protein_coding
220	7	25380332	25393908	13.576	GAIN	ENSSSCG00000028462	ENSSSCT00000030258	U6 spliceosomal RNA [Source:RFAM;Acc:RF00026]	7	25386139	25386245	U6	snRNA	ENSG00000206614	RNU6-477P
221	7	25763376	25771968	8.592	GAIN
222	7	25773024	25776240	3.216	GAIN
223	7	25970301	25975584	5.283	GAIN	ENSSSCG00000001279	ENSSSCT00000001394		7	25775981	25776937		protein_coding
224	7	26496958	26500352	3.394	GAIN	ENSSSCG00000001294	ENSSSCT00000001409		7	25969392	25970384		protein_coding
225	7	26576172	26583316	7.144	GAIN
226	7	28411174	28415340	4.166	LOSS
227	7	31783728	31786944	3.216	GAIN
228	7	52443312	52452960	9.648	LOSS
229	7	58836428	58839936	3.508	GAIN
230	7	63489804	63493227	3.423	GAIN	ENSSSCG00000001906	ENSSSCT00000002135	cytochrome P450 family 1 subfamily A member 1 [Source:HGNC Symbol;Acc:HGNC:2595]	7	63491454	63497651	CYP1A1	protein_coding	ENSG00000140465	CYP1A1		Puig-Oliveras et al., 2014
231	7	76986693	76990116	3.423	LOSS
232	7	81745556	82167276	421.72	LOSS	ENSSSCG00000002049	ENSSSCT00000002292		7	81751565	81751624		protein_coding
232	7	81745556	82167276	421.72	LOSS	ENSSSCG00000002048	ENSSSCT00000002291		7	81755107	81755166		protein_coding
232	7	81745556	82167276	421.72	LOSS	ENSSSCG00000002047	ENSSSCT00000002290		7	81755607	81755669		protein_coding
232	7	81745556	82167276	421.72	LOSS	ENSSSCG00000002046	ENSSSCT00000002289		7	81757485	81757544		protein_coding
232	7	81745556	82167276	421.72	LOSS	ENSSSCG00000022512	ENSSSCT00000026772	T cell receptor delta constant [Source:HGNC Symbol;Acc:HGNC:12253]	7	81789654	81794217	TRDC	protein_coding	ENSG00000211829	TRDC
232	7	81745556	82167276	421.72	LOSS	ENSSSCG00000002053	ENSSSCT00000002296	T cell receptor delta variable 2 [Source:HGNC Symbol;Acc:HGNC:12263]	7	81884262	81884708	TRDV2	protein_coding	ENSG00000211821	TRDV2
232	7	81745556	82167276	421.72	LOSS	ENSSSCG00000026675	ENSSSCT00000026928		7	81905098	81907677		protein_coding
232	7	81745556	82167276	421.72	LOSS	ENSSSCG00000002055	ENSSSCT00000002298		7	82005128	82005649		protein_coding
232	7	81745556	82167276	421.72	LOSS	ENSSSCG00000002056	ENSSSCT00000002299	T cell receptor alpha variable 41 [Source:HGNC Symbol;Acc:HGNC:12142]	7	82044373	82044905	TRAV41	protein_coding	ENSG00000211820	TRAV41
232	7	81745556	82167276	421.72	LOSS	ENSSSCG00000002057	ENSSSCT00000002301		7	82089753	82090341		protein_coding	ENSG00000211817	TRAV38-2DV8
232	7	81745556	82167276	421.72	LOSS	ENSSSCG00000002057	ENSSSCT00000002301		7	82089753	82090341		protein_coding	ENSG00000211816	TRAV38-1
232	7	81745556	82167276	421.72	LOSS	ENSSSCG00000022761	ENSSSCT00000029132		7	82116195	82116640		protein_coding
232	7	81745556	82167276	421.72	LOSS	ENSSSCG00000027788	ENSSSCT00000032165	T cell receptor alpha variable 36/delta variable 7 [Source:HGNC Symbol;Acc:HGNC:12135]	7	82120489	82121030	TRAV36DV7	protein_coding	ENSG00000211815	TRAV36DV7
232	7	81745556	82167276	421.72	LOSS	ENSSSCG00000022057	ENSSSCT00000029423		7	82145275	82145807		protein_coding
232	7	81745556	82167276	421.72	LOSS	ENSSSCG00000002062	ENSSSCT00000002306		7	82159659	82160227		protein_coding
233	7	82260387	82263724	3.337	GAIN	ENSSSCG00000021543	ENSSSCT00000023592		7	82253358	82390901		protein_coding	ENSG00000211804	TRDV1
234	7	84211928	84262900	50.972	GAIN	ENSSSCG00000002173	ENSSSCT00000002428		7	84228771	84230053		protein_coding			Fernández et al., 2014
235	7	86186592	86199568	12.976	GAIN	ENSSSCG00000002243	ENSSSCT00000002498		7	86163488	86260506		protein_coding	ENSG00000140199	SLC12A6
236	7	87867552	87870768	3.216	LOSS
237	7	92955472	92958809	3.337	LOSS	ENSSSCG00000002263	ENSSSCT00000002520	solute carrier organic anion transporter family member 3A1 [Source:HGNC Symbol;Acc:HGNC:10952]	7	92719393	93045715	SLCO3A1	protein_coding	ENSG00000176463	SLCO3A1
238	7	95622556	95625950	3.394	LOSS											Ramayo-Caldas et al., 2010
239	7	101067498	101070921	3.423	LOSS
240	7	102782421	102786576	4.155	GAIN
241	7	103723656	103743120	19.464	GAIN	ENSSSCG00000002370	ENSSSCT00000002634	apoptosis resistant E3 ubiquitin protein ligase 1 [Source:HGNC Symbol;Acc:HGNC:20363]	7	103736066	103783771	AREL1	protein_coding	ENSG00000119682	AREL1
242	7	110864124	110867547	3.423	LOSS
243	7	111210696	111214332	3.636	LOSS
244	7	111593223	111596646	3.423	GAIN
245	7	112006848	112010829	3.981	LOSS
246	7	125927582	125931706	4.124	LOSS
247	8	4686804	4690440	3.636	LOSS
248	8	13152709	13156098	3.389	GAIN
249	8	14353008	14358564	5.556	LOSS											Ramayo-Caldas et al., 2012b
250	8	22430946	22434340	3.394	LOSS
251	8	26264679	26271525	6.846	LOSS
252	8	31598140	31601534	3.394	LOSS
253	8	37830996	37834419	3.423	LOSS
254	8	43311219	43315668	4.449	GAIN											Ramayo-Caldas et al., 2010
255	8	43319304	43882884	563.58	GAIN	ENSSSCG00000023774	ENSSSCT00000025396	Metazoan signal recognition particle RNA [Source:RFAM;Acc:RF00017]	8	43400953	43401248	Metazoa_SRP	misc_RNA			Ramayo-Caldas et al., 2010
255	8	43319304	43882884	563.58	GAIN	ENSSSCG00000029108	ENSSSCT00000030939		8	43410183	43410274		miRNA
255	8	43319304	43882884	563.58	GAIN	ENSSSCG00000008842	ENSSSCT00000009679	mast/stem cell growth factor receptor Kit precursor [Source:RefSeq peptide;Acc:NP_001037990]	8	43550236	43602062	KIT	protein_coding	ENSG00000157404	KIT		Corominas et al., 2013
255	8	43319304	43882884	563.58	GAIN	ENSSSCG00000020497	ENSSSCT00000022092	U6 spliceosomal RNA [Source:RFAM;Acc:RF00026]	8	43874124	43874204	U6	snRNA
256	8	43891320	43895184	3.864	GAIN											Ramayo-Caldas et al., 2010
257	8	55203410	55207328	3.918	LOSS
258	8	56157124	56160518	3.394	GAIN
259	8	57010065	57023757	13.692	GAIN
260	8	62374932	62381720	6.788	LOSS
261	8	70573220	70582952	9.732	GAIN
262	8	70587561	70591200	3.639	GAIN	ENSSSCG00000008935	ENSSSCT00000009783		8	70584971	70615383		protein_coding	ENSG00000156096	UGT2B4
262	8	70587561	70591200	3.639	GAIN	ENSSSCG00000008935	ENSSSCT00000009783		8	70584971	70615383		protein_coding	ENSG00000197888	UGT2B17
262	8	70587561	70591200	3.639	GAIN	ENSSSCG00000008935	ENSSSCT00000009783		8	70584971	70615383		protein_coding	ENSG00000196620	UGT2B15
262	8	70587561	70591200	3.639	GAIN	ENSSSCG00000008935	ENSSSCT00000009783		8	70584971	70615383		protein_coding	ENSG00000109181	UGT2B10
262	8	70587561	70591200	3.639	GAIN	ENSSSCG00000008935	ENSSSCT00000009783		8	70584971	70615383		protein_coding	ENSG00000213759	UGT2B11
262	8	70587561	70591200	3.639	GAIN	ENSSSCG00000008935	ENSSSCT00000009783		8	70584971	70615383		protein_coding	ENSG00000135226	UGT2B28
262	8	70587561	70591200	3.639	GAIN	ENSSSCG00000008935	ENSSSCT00000009783		8	70584971	70615383		protein_coding	ENSG00000171234	UGT2B7
263	8	70880061	70890330	10.269	GAIN
264	8	70926816	70930060	3.244	GAIN	ENSSSCG00000024160	ENSSSCT00000024161		8	70910821	70934574		protein_coding
265	8	70931406	70938252	6.846	GAIN	ENSSSCG00000024160	ENSSSCT00000024161		8	70910821	70934574		protein_coding
266	8	72553908	72557331	3.423	LOSS	ENSSSCG00000008944	ENSSSCT00000009798	neuropeptide FF receptor 2 [Source:HGNC Symbol;Acc:HGNC:4525]	8	72528696	72559247	NPFFR2	protein_coding	ENSG00000056291	NPFFR2
267	8	81662511	81720702	58.191	LOSS	ENSSSCG00000029432	ENSSSCT00000028841		8	81681550	81684874		protein_coding	ENSG00000059691	GATB
268	8	81758355	81765201	6.846	LOSS
269	8	87293088	87296724	3.636	LOSS	ENSSSCG00000009035	ENSSSCT00000009895	Sus scrofa solute carrier family 10 (sodium/bile acid cotransporter family), member 7 (SLC10A7), mRNA. [Source:RefSeq mRNA;Acc:NM_001137640]	8	87282708	87651904	SLC10A7	protein_coding	ENSG00000120519	SLC10A7	Ramayo-Caldas et al., 2012b; Muñoz et al., 2014
270	8	94634902	94639104	4.202	LOSS											Muñoz et al., 2014
271	8	95626632	95630802	4.17	LOSS											Muñoz et al., 2014
272	8	95878608	95885040	6.432	LOSS											Muñoz et al., 2014
273	8	97814144	97820818	6.674	LOSS											Ramayo-Caldas et al., 2012b; Muñoz et al., 2014
274	8	101358780	101362024	3.244	LOSS											Muñoz et al., 2014
275	8	103676518	103679912	3.394	LOSS											Muñoz et al., 2014
276	8	105144291	105147772	3.481	LOSS											Muñoz et al., 2014
277	8	108779517	108785484	5.967	LOSS											Muñoz et al., 2014
278	8	112209790	112215822	6.032	LOSS											Muñoz et al., 2014
279	8	112566924	112589316	22.392	LOSS											Muñoz et al., 2014
280	8	113752260	113755896	3.636	GAIN											Muñoz et al., 2014
281	8	114972998	114978538	5.54	LOSS											Ramayo-Caldas et al., 2012b; Muñoz et al., 2014
282	8	115426983	115430406	3.423	LOSS											Ramayo-Caldas et al., 2012b; Muñoz et al., 2014
283	8	124712530	124719318	6.788	LOSS	ENSSSCG00000009156	ENSSSCT00000010027		8	124634054	124723522		protein_coding	ENSG00000236699	ARHGEF38	Muñoz et al., 2014
284	8	126194652	126198288	3.636	LOSS											Muñoz et al., 2014
285	8	127116140	127119384	3.244	LOSS											Muñoz et al., 2014
286	8	129242211	129245634	3.423	LOSS											Muñoz et al., 2014
287	8	131877921	131881728	3.807	LOSS
288	8	137593512	137597148	3.636	LOSS
289	8	138755797	138760668	4.871	LOSS	ENSSSCG00000009203	ENSSSCT00000010077	synuclein alpha [Source:HGNC Symbol;Acc:HGNC:11138]	8	138635406	138774099	SNCA	protein_coding	ENSG00000145335	SNCA		Corominas et al., 2013
290	8	145954048	145957292	3.244	LOSS
291	9	3717378	3724511	7.133	GAIN	ENSSSCG00000014618	ENSSSCT00000015968		9	3718554	3725457		protein_coding
292	9	4268023	4271360	3.337	LOSS
293	9	4895196	4898440	3.244	GAIN	ENSSSCG00000014690	ENSSSCT00000016041	ubiquilin-like [Source:HGNC Symbol;Acc:HGNC:28294]	9	4895160	4897001	UBQLNL	protein_coding	ENSG00000175518	UBQLNL
294	9	5148816	5348944	200.128	GAIN	ENSSSCG00000014688	ENSSSCT00000016039		9	5151024	5151959		pseudogene
294	9	5148816	5348944	200.128	GAIN	ENSSSCG00000014729	ENSSSCT00000016080		9	5170469	5171436		pseudogene
294	9	5148816	5348944	200.128	GAIN	ENSSSCG00000024353	ENSSSCT00000032278		9	5184160	5185107		protein_coding
294	9	5148816	5348944	200.128	GAIN	ENSSSCG00000027566	ENSSSCT00000016043		9	5203830	5204789		protein_coding
294	9	5148816	5348944	200.128	GAIN	ENSSSCG00000014693	ENSSSCT00000016044		9	5209262	5210203		protein_coding
294	9	5148816	5348944	200.128	GAIN	ENSSSCG00000014694	ENSSSCT00000016045		9	5214883	5215877		pseudogene
294	9	5148816	5348944	200.128	GAIN	ENSSSCG00000014695	ENSSSCT00000016046		9	5226277	5227238		pseudogene
294	9	5148816	5348944	200.128	GAIN	ENSSSCG00000027874	ENSSSCT00000029141		9	5235903	5237569		protein_coding
294	9	5148816	5348944	200.128	GAIN	ENSSSCG00000025490	ENSSSCT00000027182		9	5241770	5242732		protein_coding	ENSG00000181609	OR52D1
294	9	5148816	5348944	200.128	GAIN	ENSSSCG00000029107	ENSSSCT00000030938		9	5248733	5249686		protein_coding	ENSG00000181609	OR52D1
294	9	5148816	5348944	200.128	GAIN	ENSSSCG00000022374	ENSSSCT00000016049		9	5259242	5260186		protein_coding
294	9	5148816	5348944	200.128	GAIN	ENSSSCG00000014704	ENSSSCT00000016055		9	5325263	5326213		protein_coding
294	9	5148816	5348944	200.128	GAIN	ENSSSCG00000023352	ENSSSCT00000016054		9	5338774	5339730		protein_coding
295	9	5561349	5569221	7.872	GAIN
296	9	5586168	5589759	3.591	GAIN	ENSSSCG00000022276	ENSSSCT00000016072		9	5589679	5590626		protein_coding	ENSG00000171944	OR52A5
297	9	5748516	5788512	39.996	LOSS	ENSSSCG00000014740	ENSSSCT00000016091	olfactory receptor family 52 subfamily E member 2 [Source:HGNC Symbol;Acc:HGNC:14769]	9	5752638	5753734	OR52E2	protein_coding	ENSG00000176787	OR52E2
297	9	5748516	5788512	39.996	LOSS	ENSSSCG00000014745	ENSSSCT00000016096	olfactory receptor family 52 subfamily J member 3 [Source:HGNC Symbol;Acc:HGNC:14799]	9	5768665	5769600	OR52J3	protein_coding	ENSG00000205495	OR52J3
298	9	11128173	11133432	5.259	GAIN	ENSSSCG00000014861	ENSSSCT00000016214	monoacylglycerol O-acyltransferase 2 [Source:HGNC Symbol;Acc:HGNC:23248]	9	11119062	11132962	MOGAT2	protein_coding	ENSG00000166391	MOGAT2		Ramayo-Caldas et al., 2012; Corominas et al., 2013
299	9	19912598	19915992	3.394	GAIN
300	9	25617451	25620840	3.389	GAIN	ENSSSCG00000028810	ENSSSCT00000030083	tripartite motif containing 43 [Source:HGNC Symbol;Acc:HGNC:19015]	9	25616290	25622031	TRIM43	protein_coding	ENSG00000144015	TRIM43
301	9	38521900	38525294	3.394	GAIN	ENSSSCG00000014994	ENSSSCT00000016357	platelet derived growth factor D [Source:HGNC Symbol;Acc:HGNC:30620]	9	38454987	38615959	PDGFD	protein_coding	ENSG00000170962	PDGFD
302	9	49012754	49016148	3.394	LOSS
303	9	52338874	52342268	3.394	LOSS
304	9	53060784	53064000	3.216	LOSS
305	9	56781620	56787048	5.428	GAIN	ENSSSCG00000015177	ENSSSCT00000016543		9	56783624	56784568		protein_coding
306	9	56968290	56975078	6.788	GAIN	ENSSSCG00000015182	ENSSSCT00000016548		9	56971208	56972140		protein_coding
307	9	57188476	57263933	75.457	LOSS	ENSSSCG00000015189	ENSSSCT00000016555		9	57194291	57195226		protein_coding
308	9	78509599	78513402	3.803	GAIN
309	9	81808976	81812370	3.394	LOSS
310	9	92243004	92246427	3.423	LOSS
311	9	113329140	113332384	3.244	LOSS
312	9	115199148	115212724	13.576	LOSS
313	9	115928858	115932252	3.394	LOSS
314	9	119544408	119548044	3.636	GAIN	ENSSSCG00000029596	ENSSSCT00000029694		9	119542539	119595213		protein_coding	ENSG00000211689	TRGC1
314	9	119544408	119548044	3.636	GAIN	ENSSSCG00000029596	ENSSSCT00000029694		9	119542539	119595213		protein_coding	ENSG00000227191	TRGC2
315	9	119588040	119591676	3.636	GAIN
316	9	125044064	125048536	4.472	LOSS											Fernández et al., 2012
317	9	125527090	125530484	3.394	GAIN	ENSSSCG00000015480	ENSSSCT00000016863	proline-rich coiled-coil 2C [Source:HGNC Symbol;Acc:HGNC:24903]	9	125431812	125532069	PRRC2C	protein_coding	ENSG00000117523	PRRC2C	Fernández et al., 2012
318	9	149312242	149315636	3.394	LOSS
319	9	152352036	152355672	3.636	LOSS
320	10	465408	469044	3.636	LOSS
321	10	481238	485342	4.104	GAIN
322	10	5312496	5315919	3.423	LOSS
323	10	9374228	9377622	3.394	LOSS
324	10	10073392	10080180	6.788	LOSS
325	10	14339089	14343044	3.955	LOSS
326	10	21366811	21370148	3.337	LOSS
327	10	22598164	22602069	3.905	GAIN
328	10	22608648	22612284	3.636	GAIN
329	10	23459472	23656353	196.881	GAIN											Fernández et al., 2014
330	10	23737636	23780613	42.977	GAIN
331	10	24373688	24383855	10.167	GAIN	ENSSSCG00000010893	ENSSSCT00000036286	complement factor H precursor [Source:RefSeq peptide;Acc:NP_999446]	10	24337266	24406910	CFH	protein_coding	ENSG00000116785	CFHR3		Puig-Oliveras et al., 2014
331	10	24373688	24383855	10.167	GAIN	ENSSSCG00000010893	ENSSSCT00000036286	complement factor H precursor [Source:RefSeq peptide;Acc:NP_999446]	10	24337266	24406910	CFH	protein_coding	ENSG00000000971	CFH		Puig-Oliveras et al., 2014
332	10	46620792	46628784	7.992	GAIN	ENSSSCG00000011025	ENSSSCT00000035562	zinc finger E-box binding homeobox 1 [Source:HGNC Symbol;Acc:HGNC:11642]	10	46547260	46794724	ZEB1	protein_coding	ENSG00000148516	ZEB1
333	10	46630166	46633560	3.394	GAIN	ENSSSCG00000011025	ENSSSCT00000035562	zinc finger E-box binding homeobox 1 [Source:HGNC Symbol;Acc:HGNC:11642]	10	46547260	46794724	ZEB1	protein_coding
334	10	48527871	48531294	3.423	LOSS
335	10	52100244	52103880	3.636	LOSS
336	10	57124414	57141384	16.97	GAIN
337	10	66790055	66793392	3.337	LOSS
338	10	68239764	68415960	176.196	GAIN
339	10	76904502	76909966	5.464	GAIN
340	11	1718555	1721892	3.337	LOSS
341	11	10318004	10322408	4.404	LOSS
342	11	10609644	10616432	6.788	LOSS
343	11	17138052	17141296	3.244	LOSS
344	11	19531461	19535368	3.907	LOSS
345	11	24596318	24599712	3.394	LOSS
346	11	24970152	24976930	6.778	GAIN	ENSSSCG00000009428	ENSSSCT00000010335	family with sequence similarity 216 member B [Source:HGNC Symbol;Acc:HGNC:26883]	11	24964616	24974127	FAM216B	protein_coding	ENSG00000179813	FAM216B
347	11	25090903	25094240	3.337	LOSS
348	11	28101408	28104624	3.216	LOSS
349	11	29109192	29112615	3.423	LOSS
350	11	30727096	30730433	3.337	LOSS
351	11	31471062	31505728	34.666	LOSS
352	11	36007308	36021852	14.544	GAIN
353	11	38525294	38532339	7.045	LOSS
354	11	38539013	38542350	3.337	GAIN
355	11	39759660	39764104	4.444	GAIN
356	11	44481885	44485308	3.423	LOSS
357	11	46020567	46025658	5.091	LOSS
358	11	47765818	47769155	3.337	LOSS
359	11	51256188	51259657	3.469	LOSS
360	11	51632880	51636096	3.216	LOSS
361	11	57182597	57192843	10.246	LOSS
362	11	57691296	57696730	5.434	LOSS
363	11	57902156	57928108	25.952	GAIN
364	11	62428992	62443756	14.764	LOSS											Ramayo-Caldas et al., 2010
365	11	62517384	62681004	163.62	LOSS											Ramayo-Caldas et al., 2010
366	11	64137140	64140477	3.337	LOSS
367	11	64667316	64670739	3.423	LOSS
368	11	66011616	66014832	3.216	LOSS
369	11	69061112	69064506	3.394	LOSS
370	11	79687440	79690863	3.423	LOSS
371	11	82847540	82857722	10.182	LOSS
372	12	6377049	6380472	3.423	LOSS	ENSSSCG00000017229	ENSSSCT00000018756		12	6378936	6391650		protein_coding	ENSG00000161509	GRIN2C
373	12	20231634	20235072	3.438	GAIN	ENSSSCG00000017383	ENSSSCT00000018922	amine oxidase, copper containing 3 [Source:HGNC Symbol;Acc:HGNC:550]	12	20231727	20236169	AOC3	protein_coding	ENSG00000131471	AOC3
374	12	30830961	30917847	86.886	LOSS
375	12	50883552	50930817	47.265	GAIN	ENSSSCG00000017838	ENSSSCT00000019414		12	50890780	50892043		protein_coding	ENSG00000184166	OR1D2
375	12	50883552	50930817	47.265	GAIN	ENSSSCG00000017838	ENSSSCT00000019414		12	50890780	50892043		protein_coding	ENSG00000262628	OR1D5
375	12	50883552	50930817	47.265	GAIN	ENSSSCG00000017839	ENSSSCT00000019415		12	50907917	50908897		protein_coding	ENSG00000184166	OR1D2
375	12	50883552	50930817	47.265	GAIN	ENSSSCG00000017839	ENSSSCT00000019415		12	50907917	50908897		protein_coding	ENSG00000262628	OR1D5
375	12	50883552	50930817	47.265	GAIN	ENSSSCG00000017840	ENSSSCT00000019416		12	50917403	50918343		pseudogene
376	12	51248712	51252983	4.271	GAIN
377	13	1269356	1310084	40.728	LOSS
378	13	6988118	6993189	5.071	LOSS
379	13	13005808	13010963	5.155	LOSS
380	13	38710992	38720976	9.984	LOSS
381	13	41983095	41986518	3.423	LOSS
382	13	44128788	44132182	3.394	GAIN
383	13	53621295	53624718	3.423	LOSS
384	13	54663764	54667158	3.394	LOSS
385	13	57158354	57161748	3.394	GAIN
386	13	59139024	59148672	9.648	LOSS
387	13	61509484	61522460	12.976	LOSS
388	13	62297776	62304264	6.488	GAIN
389	13	79766568	79770204	3.636	LOSS
390	13	80124707	80128946	4.239	LOSS	ENSSSCG00000021397	ENSSSCT00000024591	podocalyxin-like 2 [Source:HGNC Symbol;Acc:HGNC:17936]	13	80097426	80140933	PODXL2	protein_coding	ENSG00000114631	PODXL2
391	13	86107752	86111388	3.636	LOSS											Ramayo-Caldas et al., 2010; Fernández et al., 2012
392	13	92093916	92097160	3.244	GAIN	ENSSSCG00000011686	ENSSSCT00000012794		13	92043893	92260574		protein_coding	ENSG00000181804	SLC9A9
393	13	96109988	96113376	3.388	LOSS
394	13	101834640	101956848	122.208	LOSS
395	13	113530464	113534100	3.636	LOSS											Muñoz et al., 2014
396	13	114075345	114079500	4.155	LOSS
397	13	122220896	122237841	16.945	LOSS											Ramayo-Caldas et al., 2010
398	13	128415384	128418778	3.394	LOSS											Ramayo-Caldas et al., 2010
399	13	138378888	138382524	3.636	LOSS											Ramayo-Caldas et al., 2010
400	13	138407976	138415851	7.875	LOSS											Ramayo-Caldas et al., 2010
401	13	141239826	141255210	15.384	GAIN	ENSSSCG00000011827	ENSSSCT00000012939	large 60S subunit nuclear export GTPase 1 [Source:HGNC Symbol;Acc:HGNC:25652]	13	141225232	141253596	LSG1	protein_coding	ENSG00000041802	LSG1	Ramayo-Caldas et al., 2010	Ramayo-Caldas et al., 2012
402	13	151823742	151830590	6.848	GAIN											Ramayo-Caldas et al., 2010
403	13	164250768	164366544	115.776	GAIN
404	13	164399844	164492265	92.421	LOSS
405	13	164536992	164559504	22.512	LOSS
406	13	170625983	170629704	3.721	LOSS
407	13	172531836	172535472	3.636	LOSS	ENSSSCG00000011988	ENSSSCT00000013117		13	172530708	172532504		protein_coding	ENSG00000196578	OR5AC2
408	13	172579104	172586376	7.272	GAIN
409	13	172601352	172609996	8.644	GAIN
410	13	172749488	172753632	4.144	GAIN
411	13	176379392	176382786	3.394	LOSS
412	13	178352639	178355976	3.337	LOSS
413	13	183031233	183036240	5.007	LOSS
414	13	183669704	183676492	6.788	GAIN
415	13	186017448	186020692	3.244	LOSS
416	13	190432224	190435440	3.216	LOSS
417	13	193974980	193979810	4.83	GAIN
418	13	196877268	196880691	3.423	LOSS
419	13	197271180	197274816	3.636	LOSS
420	13	203351510	203358298	6.788	LOSS
421	13	204261024	204283536	22.512	GAIN	ENSSSCG00000028321	ENSSSCT00000030576	keratin associated protein 26-1 [Source:HGNC Symbol;Acc:HGNC:33760]	13	204269943	204270494	KRTAP26-1	protein_coding	ENSG00000197683	KRTAP26-1
422	13	213476832	213480468	3.636	LOSS	ENSSSCG00000012071	ENSSSCT00000013203	immunoglobulin superfamily member 5 [Source:HGNC Symbol;Acc:HGNC:5952]	13	213446785	213480182	IGSF5	protein_coding	ENSG00000183067	IGSF5	Fernández et al., 2014
423	14	1832760	1836154	3.394	GAIN
424	14	8999889	9003226	3.337	LOSS
425	14	16878362	16882236	3.874	LOSS
426	14	20027994	20031388	3.394	LOSS
427	14	21677152	21680489	3.337	GAIN
428	14	23163441	23166864	3.423	LOSS	ENSSSCG00000009722	ENSSSCT00000010659	sparc/osteonectin, cwcv and kazal-like domains proteoglycan (testican) 3 [Source:HGNC Symbol;Acc:HGNC:13565]	14	23085504	23503718	SPOCK3	protein_coding	ENSG00000196104	SPOCK3
429	14	23292216	23295852	3.636	LOSS
430	14	23775804	23781764	5.96	GAIN	ENSSSCG00000009724	ENSSSCT00000010662	anomalous homeobox [Source:HGNC Symbol;Acc:HGNC:40024]	14	23777828	23778880	ANHX	protein_coding	ENSG00000227059	ANHX
431	14	35024136	35027559	3.423	LOSS											Ramayo-Caldas et al., 2012b
432	14	36125328	36129130	3.802	LOSS											Ramayo-Caldas et al., 2012b
433	14	38579598	38585731	6.133	GAIN											Ramayo-Caldas et al., 2012b
434	14	38687944	38692515	4.571	GAIN											Ramayo-Caldas et al., 2012b
435	14	41263680	41266924	3.244	GAIN	ENSSSCG00000009880	ENSSSCT00000010829	solute carrier family 8 (sodium/lithium/calcium exchanger), member B1 [Source:HGNC Symbol;Acc:HGNC:26175]	14	41230165	41288614	SLC8B1	protein_coding	ENSG00000089060	SLC8B1
435	14	41263680	41266924	3.244	GAIN	ENSSSCG00000009882	ENSSSCT00000010832	2'-5'-oligoadenylate synthetase 1 [Source:HGNC Symbol;Acc:HGNC:8086]	14	41260566	41268627	OAS1	protein_coding	ENSG00000089127	OAS1		Ramayo-Caldas et al., 2012; Corominas et al., 2013
436	14	45072240	45075456	3.216	LOSS	ENSSSCG00000009947	ENSSSCT00000010899	Chemokine-like receptor 1 [Source:UniProtKB/Swiss-Prot;Acc:B1PHQ8]	14	44964240	45118925	CMKLR1	protein_coding	ENSG00000174600	CMKLR1
436	14	45072240	45075456	3.216	LOSS	ENSSSCG00000009948	ENSSSCT00000010900	WSC domain containing 2 [Source:HGNC Symbol;Acc:HGNC:29117]	14	45050256	45084726	WSCD2	protein_coding	ENSG00000075035	WSCD2
437	14	49984923	49988260	3.337	LOSS	ENSSSCG00000009994	ENSSSCT00000010951	myotubularin related protein 3 [Source:HGNC Symbol;Acc:HGNC:7451]	14	49912161	50062681	MTMR3	protein_coding	ENSG00000100330	MTMR3
438	14	55895786	55899864	4.078	LOSS											Ramayo-Caldas et al., 2010
439	14	61894676	61898013	3.337	LOSS	ENSSSCG00000010165	ENSSSCT00000026272	pecanex-like 2 (Drosophila) [Source:HGNC Symbol;Acc:HGNC:8736]	14	61675892	61941854	PCNXL2	protein_coding	ENSG00000135749	PCNXL2
440	14	74618657	74623878	5.221	LOSS
441	14	86751989	86755326	3.337	LOSS
442	14	98151181	98154518	3.337	LOSS
443	14	100974894	100978288	3.394	GAIN
444	14	102772152	102776928	4.776	LOSS											Ramayo-Caldas et al., 2010
445	14	103059684	103063107	3.423	LOSS											Ramayo-Caldas et al., 2010
446	14	103126648	103130084	3.436	LOSS											Ramayo-Caldas et al., 2010
447	14	106486107	106491408	5.301	LOSS	ENSSSCG00000010429	ENSSSCT00000011414	protein kinase, cGMP-dependent, type I [Source:HGNC Symbol;Acc:HGNC:9414]	14	106253479	106707670	PRKG1	protein_coding	ENSG00000185532	PRKG1		Puig-Oliveras et al., 2014
448	14	116187648	116193590	5.942	mixed											Ramayo-Caldas et al., 2010
449	14	116287344	116293824	6.48	GAIN	ENSSSCG00000010489	ENSSSCT00000011477		14	116289688	116292149		pseudogene
450	14	125258964	125262358	3.394	LOSS
451	14	128485332	128488968	3.636	LOSS
452	14	131222448	131289984	67.536	GAIN	ENSSSCG00000010621	ENSSSCT00000011617	adducin 3 [Source:HGNC Symbol;Acc:HGNC:245]	14	131288632	131418839	ADD3	protein_coding	ENSG00000148700	ADD3
453	14	132317676	132321312	3.636	LOSS	ENSSSCG00000010628	ENSSSCT00000011624	SHOC2 leucine-rich repeat scaffold protein [Source:HGNC Symbol;Acc:HGNC:15454]	14	132275870	132379489	SHOC2	protein_coding	ENSG00000108061	SHOC2
454	14	136977900	136981144	3.244	LOSS
455	14	142018560	142021776	3.216	LOSS
456	14	149791256	149797930	6.674	LOSS											Fernández et al., 2012
457	15	12153354	12156691	3.337	LOSS
458	15	12849484	12852728	3.244	LOSS
459	15	16542356	16545750	3.394	LOSS
460	15	18490317	18494469	4.152	GAIN	ENSSSCG00000030013	ENSSSCT00000023810		15	18486694	18548907		protein_coding	ENSG00000115850	LCT
461	15	18537024	18540372	3.348	GAIN	ENSSSCG00000030013	ENSSSCT00000023810		15	18486694	18548907		protein_coding
462	15	19104826	19108220	3.394	LOSS	ENSSSCG00000015694	ENSSSCT00000017094	zinc finger, RAN-binding domain containing 3 [Source:HGNC Symbol;Acc:HGNC:25249]	15	18995367	19182345	ZRANB3	protein_coding	ENSG00000121988	ZRANB3
463	15	20054976	20058192	3.216	GAIN	ENSSSCG00000015701	ENSSSCT00000017101	mannosyl (alpha-1,6-)-glycoprotein beta-1,6-N-acetyl-glucosaminyltransferase [Source:HGNC Symbol;Acc:HGNC:7049]	15	20029046	20247084	MGAT5	protein_coding	ENSG00000152127	MGAT5
463	15	20054976	20058192	3.216	GAIN	ENSSSCG00000022132	ENSSSCT00000023763	SUB1 homolog, transcriptional regulator [Source:HGNC Symbol;Acc:HGNC:19985]	15	20055352	20056418	SUB1	protein_coding	ENSG00000113387	SUB1
464	15	25571988	25575624	3.636	GAIN
465	15	37086238	37090836	4.598	LOSS
466	15	38707408	38710652	3.244	LOSS
467	15	48552948	48556192	3.244	LOSS
468	15	51750196	51755106	4.91	LOSS
469	15	53580096	53583732	3.636	LOSS
470	15	54600179	54603568	3.389	LOSS	ENSSSCG00000015808	ENSSSCT00000017216	ADAM metallopeptidase domain 9 [Source:HGNC Symbol;Acc:HGNC:216]	15	54597519	54674520	ADAM9	protein_coding	ENSG00000168615	ADAM9
471	15	56630112	56652249	22.137	LOSS	ENSSSCG00000015829	ENSSSCT00000017237		15	56640841	56650870		protein_coding
472	15	56830141	56833530	3.389	LOSS
473	15	60263788	60267032	3.244	LOSS											Ramayo-Caldas et al., 2012b
474	15	79884443	79887972	3.529	LOSS	ENSSSCG00000015903	ENSSSCT00000017316	solute carrier family 38 member 11 [Source:HGNC Symbol;Acc:HGNC:26836]	15	79859475	79997023	SLC38A11	protein_coding	ENSG00000169507	SLC38A11
475	15	84142872	84146116	3.244	LOSS
476	15	98373597	98397558	23.961	GAIN
477	15	98567184	98580048	12.864	GAIN
478	15	99529164	99532408	3.244	LOSS
479	15	100262700	100266336	3.636	LOSS
480	15	100766274	100773360	7.086	LOSS
481	15	105359101	105362438	3.337	LOSS	ENSSSCG00000016042	ENSSSCT00000017467	ankyrin and armadillo repeat containing [Source:HGNC Symbol;Acc:HGNC:26350]	15	105314258	105373846	ANKAR	protein_coding	ENSG00000151687	ANKAR
482	15	106737906	106741300	3.394	LOSS
483	15	110182460	110218752	36.292	LOSS
484	15	112647900	112651144	3.244	GAIN	ENSSSCG00000016082	ENSSSCT00000017510	boule homolog, RNA binding protein [Source:HGNC Symbol;Acc:HGNC:14273]	15	112634532	112667533	BOLL	protein_coding	ENSG00000152430	BOLL
485	15	120143877	120151272	7.395	LOSS	ENSSSCG00000016123	ENSSSCT00000017554		15	119988739	120488321		protein_coding	ENSG00000116117	PARD3B
486	15	137971656	137975292	3.636	LOSS	ENSSSCG00000016226	ENSSSCT00000017668		15	137963755	137984079		protein_coding	ENSG00000116120	FARSB
487	15	146585340	146588976	3.636	LOSS	ENSSSCG00000022177	ENSSSCT00000026575		15	146381891	146596424		protein_coding	ENSG00000144535	DIS3L2
488	15	149285090	149288484	3.394	LOSS
489	15	155290280	155294664	4.384	GAIN
490	15	156734920	156738890	3.97	LOSS
491	15	157436064	157447540	11.476	GAIN
492	16	1103050	1114558	11.508	LOSS
493	16	2369270	2372607	3.337	LOSS
494	16	6142560	6147380	4.82	GAIN	ENSSSCG00000016793	ENSSSCT00000018281	zinc finger protein 622 [Source:HGNC Symbol;Acc:HGNC:30958]	16	6142034	6158561	ZNF622	protein_coding	ENSG00000173545	ZNF622
495	16	6635270	6648846	13.576	GAIN
496	16	7604916	7639236	34.32	GAIN
497	16	7675100	7681212	6.112	GAIN
498	16	7695888	7708752	12.864	GAIN
499	16	10310076	10318968	8.892	LOSS											Muñoz et al., 2014
500	16	12323541	12326878	3.337	LOSS											Muñoz et al., 2014
501	16	16060212	16064139	3.927	LOSS											Muñoz et al., 2014
502	16	16743780	16751052	7.272	GAIN
503	16	27348852	27352246	3.394	LOSS
504	16	30196418	30206600	10.182	LOSS
505	16	30249051	30253544	4.493	GAIN	ENSSSCG00000016878	ENSSSCT00000018382	fibroblast growth factor 10 [Source:HGNC Symbol;Acc:HGNC:3666]	16	30234655	30317162	FGF10	protein_coding	ENSG00000070193	FGF10
506	16	31541324	31545936	4.612	LOSS
507	16	32651280	32655882	4.602	LOSS
508	16	49476042	49482888	6.846	GAIN											Ramayo-Caldas et al., 2012b
509	16	51996080	51999504	3.424	LOSS
510	16	76724764	76728158	3.394	LOSS											Ramayo-Caldas et al., 2012b
511	16	78431199	78438405	7.206	LOSS
512	16	80231186	80234575	3.389	LOSS
513	16	81391960	81395517	3.557	LOSS
514	16	81396960	81409824	12.864	LOSS
515	17	3696066	3699460	3.394	LOSS
516	17	10994676	11006892	12.216	GAIN	ENSSSCG00000007008	ENSSSCT00000007676	ADAM metallopeptidase domain 18 [Source:HGNC Symbol;Acc:HGNC:196]	17	10953502	10995642	ADAM18	protein_coding	ENSG00000168619	ADAM18
517	17	14253120	14260392	7.272	LOSS
518	17	14495774	14501531	5.757	GAIN	ENSSSCG00000007038	ENSSSCT00000007707		17	14437664	14498392		protein_coding
519	17	16993344	16997152	3.808	LOSS
520	17	17085564	17089200	3.636	GAIN
521	17	17092636	17104731	12.095	GAIN
522	17	21939624	21943260	3.636	LOSS	ENSSSCG00000007066	ENSSSCT00000007737	SLX4 interacting protein [Source:HGNC Symbol;Acc:HGNC:16225]	17	21839085	22025392	SLX4IP	protein_coding	ENSG00000149346	SLX4IP
523	17	35883684	35887320	3.636	LOSS	ENSSSCG00000007140	ENSSSCT00000007812	spermine oxidase [Source:HGNC Symbol;Acc:HGNC:15862]	17	35882699	35915987	SMOX	protein_coding	ENSG00000088826	SMOX
524	17	54866954	54880959	14.005	LOSS
525	17	56121200	56125296	4.096	GAIN
526	17	56550144	56553360	3.216	GAIN
527	17	61094252	61097496	3.244	LOSS	ENSSSCG00000007482	ENSSSCT00000034759	Teashirt homolog 2 [Source:UniProtKB/Swiss-Prot;Acc:A5GFT6]	17	60735916	61243854	TSHZ2	protein_coding	ENSG00000182463	TSHZ2
528	17	67526352	67530869	4.517	GAIN
529	17	67531428	67550782	19.354	GAIN
530	17	67630884	67656864	25.98	GAIN
531	17	67662441	67673232	10.791	GAIN
532	17	67674288	67677697	3.409	GAIN
533	18	22581479	22588377	6.898	LOSS
534	18	23167444	23192150	24.706	LOSS
535	18	23561280	23577624	16.344	LOSS
536	18	25289124	25292547	3.423	GAIN
537	18	32188722	32192111	3.389	LOSS
538	18	37395648	37402080	6.432	GAIN
539	18	44329034	44333748	4.714	LOSS	ENSSSCG00000024754	ENSSSCT00000031056		18	43984662	44336212		protein_coding	ENSG00000122507	BBS9
540	18	45368442	45373189	4.747	LOSS	ENSSSCG00000016668	ENSSSCT00000018147	phosphodiesterase 1C [Source:HGNC Symbol;Acc:HGNC:8776]	18	45285275	45567277	PDE1C	protein_coding	ENSG00000154678	PDE1C
*The genomic coordinates are expressed in bp and are relative to the Sus scrofa July 2015 genome sequence assembly (Sscrofa10.2)
