# Supplementary material for: A global analysis of CNVs in swine using whole genome sequence data and association analysis with fatty acid composition and growth traits
Source: PLoS One. 2017 May 4;12(5):e0177014. doi: 10.1371/journal.pone.0177014 (PMC5417718; doi:10.1371/journal.pone.0177014)
Supplement: S4 Table — (XLSX) [file pone.0177014.s008.xlsx]

## Sheet: S4 Table
S4 Table. Pathway analysis of genes in identified CNVRs.
Category	Term	Count	PValue	Genes	Bonferroni	Benjamini	FDR
KEGG_PATHWAY	hsa04740:Olfactory transduction	48	2.20533e-32	ENSG00000167822, ENSG00000171944, ENSG00000172487, ENSG00000198877, ENSG00000167825, ENSG00000172154, ENSG00000181371, ENSG00000196539, ENSG00000188269, ENSG00000181767, ENSG00000205029, ENSG00000205495, ENSG00000127515, ENSG00000203663, ENSG00000177212, ENSG00000181752, ENSG00000174970, ENSG00000196936, ENSG00000149133, ENSG00000183310, ENSG00000016602, ENSG00000196071, ENSG00000188324, ENSG0000…	1.52168e-30	1.52168e-30	2.2756e-29
KEGG_PATHWAY	hsa00830:Retinol metabolism	11	1.03226e-08	ENSG00000162365, ENSG00000135226, ENSG00000197888, ENSG00000196620, ENSG00000140465, ENSG00000213759, ENSG00000197408, ENSG00000156096, ENSG00000109181, ENSG00000187048, ENSG00000171234	7.12258e-07	3.56129e-07	1.06515e-05
KEGG_PATHWAY	hsa00053:Ascorbate and aldarate metabolism	7	1.68987e-07	ENSG00000135226, ENSG00000197888, ENSG00000196620, ENSG00000213759, ENSG00000156096, ENSG00000109181, ENSG00000171234	1.166e-05	3.88668e-06	0.000174371
KEGG_PATHWAY	hsa00040:Pentose and glucuronate interconversions	7	2.5019e-07	ENSG00000135226, ENSG00000197888, ENSG00000196620, ENSG00000213759, ENSG00000156096, ENSG00000109181, ENSG00000171234	1.7263e-05	4.31577e-06	0.000258162
KEGG_PATHWAY	hsa00140:Steroid hormone biosynthesis	9	5.6484e-07	ENSG00000137869, ENSG00000135226, ENSG00000197888, ENSG00000196620, ENSG00000140465, ENSG00000213759, ENSG00000156096, ENSG00000109181, ENSG00000171234	3.89732e-05	7.79476e-06	0.000582838
KEGG_PATHWAY	hsa00150:Androgen and estrogen metabolism	8	1.65744e-06	ENSG00000137869, ENSG00000135226, ENSG00000197888, ENSG00000196620, ENSG00000213759, ENSG00000156096, ENSG00000109181, ENSG00000171234	0.000114357	1.90605e-05	0.00171025
KEGG_PATHWAY	hsa00980:Metabolism of xenobiotics by cytochrome P450	9	4.60292e-06	ENSG00000135226, ENSG00000197888, ENSG00000196620, ENSG00000140465, ENSG00000213759, ENSG00000197408, ENSG00000156096, ENSG00000109181, ENSG00000171234	0.000317552	4.53707e-05	0.0047495
KEGG_PATHWAY	hsa00860:Porphyrin and chlorophyll metabolism	7	1.22727e-05	ENSG00000135226, ENSG00000197888, ENSG00000196620, ENSG00000213759, ENSG00000156096, ENSG00000109181, ENSG00000171234	0.000846465	0.000105847	0.0126631
KEGG_PATHWAY	hsa00500:Starch and sucrose metabolism	7	5.16942e-05	ENSG00000135226, ENSG00000197888, ENSG00000196620, ENSG00000213759, ENSG00000156096, ENSG00000109181, ENSG00000171234	0.00356064	0.000396254	0.0533286
KEGG_PATHWAY	hsa00982:Drug metabolism	8	5.69841e-05	ENSG00000135226, ENSG00000197888, ENSG00000196620, ENSG00000213759, ENSG00000197408, ENSG00000156096, ENSG00000109181, ENSG00000171234	0.0039243	0.000393124	0.0587844
KEGG_PATHWAY	hsa00983:Drug metabolism	7	5.92996e-05	ENSG00000135226, ENSG00000197888, ENSG00000196620, ENSG00000213759, ENSG00000156096, ENSG00000109181, ENSG00000171234	0.00408344	0.000371912	0.0611724
KEGG_PATHWAY	hsa00590:Arachidonic acid metabolism	5	0.0127352	ENSG00000162365, ENSG00000186115, ENSG00000197408, ENSG00000187048, ENSG00000188257	0.587026	0.0710474	12.3882
