# Supplementary material for: A global analysis of CNVs in swine using whole genome sequence data and association analysis with fatty acid composition and growth traits
Source: PLoS One. 2017 May 4;12(5):e0177014. doi: 10.1371/journal.pone.0177014 (PMC5417718; doi:10.1371/journal.pone.0177014)
Supplement: S5 Table — (XLSX) [file pone.0177014.s009.xlsx]

## Sheet: FA in BF
S5 Table. Association analysis between CNVRs and different phenotypic records in BC1_LD animals.
Trait	N		CNVR112 (GPAT2)					CNVR157 (CLCA4)					CNVR298 (MOGAT2)					CNVR447 (PRKG1)
			p-value		q-value	Coefficient of determinationa		p-value		q-value	Coefficient of determinationa		p-value		q-value	Coefficient of determinationa		p-value		q-value	Coefficient of determinationa
C14:0	147		0.73587		0.766667	0.02		0.643312		0.968	0.02		0.943533		0.975	0.01		0.85938		0.92263	0.01
C16:0	147		0.681211		0.766667	0.02		0.882516		0.968	0.01		0.760526		0.89436	0.02		0.608079		0.766609	0.02
C16:1(n-9)	147		0.455116		0.766667	0.02		0.0810739		0.51475	0.04		0.741604		0.89436	0.02		0.212601		0.475154	0.03
C16:1(n-7)	147		0.860043		0.799782	0.01		0.924512		0.968	0.01		0.600593		0.89436	0.02		0.210607		0.475154	0.03
C17:0	147		0.734357		0.766667	0.01		0.96392		0.968	0.01		0.392728		0.829722	0.03		0.451081		0.62281	0.02
C17:1	147		0.533886		0.766667	0.02		0.11096		0.51475	0.03		0.449031		0.829722	0.03		0.39524		0.62281	0.02
C18:0	147		0.957608		0.799782	0.01		0.734899		0.968	0.01		0.300385		0.829722	0.04		0.182774		0.475154	0.04
C18:1(n-9)	147		0.396444		0.766667	0.02		0.202458		0.532546	0.03		0.771261		0.89436	0.02		0.946306		0.979786	0.01
C18:1(n-7)	147		0.00175034	*	0.0211842	0.12		0.664367		0.968	0.02		0.441826		0.829722	0.03		0.446368		0.62281	0.02
C18:2(n-6)	147		0.812229		0.786358	0.01		0.0634079		0.51475	0.04		0.497398		0.829722	0.02		0.0961044		0.475154	0.04
C18:3(n-3)	147		0.0226303		0.136547	0.07		0.613846		0.968	0.02		0.40063		0.829722	0.03		0.706548		0.82012	0.02
C20:0	147		0.0201239		0.136547	0.07		0.416032		0.968	0.02		0.171023		0.829722	0.06		0.411858		0.62281	0.02
C20:1(n-9)	147		0.360486		0.766667	0.02		0.140595		0.51475	0.02		0.974848		0.975	0.01		0.211146		0.475154	0.03
C20:3(n-6)	147		0.426203		0.766667	0.02		0.888923		0.968	0.01		0.836461		0.932462	0.01		0.500198		0.659091	0.02
C20:4(n-6)	147		0.446575		0.766667	0.02		0.721919		0.968	0.01		0.456811		0.829722	0.02		0.163996		0.475154	0.04
SFA	147		0.61836		0.766667	0.02		0.708973		0.968	0.01		0.35747		0.829722	0.03		0.181145		0.475154	0.04
MUFA	147		0.44376		0.766667	0.02		0.179555		0.5307	0.03		0.69762		0.89436	0.02		0.855007		0.92263	0.01
PUFA	147		0.927522		0.799782	0.01		0.0729927		0.51475	0.04		0.496758		0.829722	0.02		0.116246		0.475154	0.04
MUFA/PUFA	147		0.743074		0.766667	0.01		0.0453209		0.51475	0.04		0.689716		0.89436	0.02		0.138471		0.475154	0.04
MUFA/SFA	147		0.519359		0.766667	0.02		0.715769		0.968	0.01		0.432874		0.829722	0.03		0.32997		0.562941	0.03
PUFA/SFA	147		0.928446		0.799782	0.01		0.141568		0.51475	0.03		0.40614		0.829722	0.03		0.101897		0.475154	0.05
C16:1(n-7)/C16:0	147		0.717138		0.766667	0.02		0.967694		0.968	0.01		0.49921		0.829722	0.02		0.112197		0.475154	0.04
C18:1(n-7)/C16:1(n-7)	147		0.0282013		0.136547	0.06		0.751398		0.968	0.01		0.927803		0.975	0.01		0.0506431		0.475154	0.06
C18:1(n-9)/C18:0	147		0.760295		0.766667	0.01		0.904972		0.968	0.01		0.343176		0.829722	0.03		0.256603		0.500733	0.03
C18:2(n-6)/C18:3(n-3)	147		9.34429e-05	*	0.00226126	0.17		0.183457		0.5307	0.03		0.654916		0.89436	0.02		0.0149647		0.435	0.1
C20:1(n-9)/C20:0	147		0.0351549		0.142035	0.06		0.844276		0.968	0.01		0.0897202		0.829722	0.07		0.981866		0.982	0.01
C20:3(n-6)/C18:2(n-6)	147		0.60968		0.766667	0.02		0.0956518		0.51475	0.03		0.385165		0.829722	0.03		0.258992		0.500733	0.03
C20:4(n-6)/C18:2(n-6)	147		0.49933		0.766667	0.02		0.489459		0.968	0.02		0.229074		0.829722	0.05		0.648539		0.784208	0.02
C20:4(n-6)/C20:3(n-6)	147		0.688309		0.766667	0.02		0.772017		0.968	0.01		0.515181		0.829722	0.02		0.298744		0.541937	0.03
aThe coefficient of determination reflects the genetic variability explained by each CNVR
*Statistically significant association

## Sheet: FA in IMF
S5 Table. Association analysis between CNVRs and different phenotypic records in BC1_LD animals.
Trait	N		CNVR112 (GPAT2)					CNVR157 (CLCA4)					CNVR298 (MOGAT2)					CNVR447 (PRKG1)
			p-value		q-value	Coefficient of determinationa		p-value		q-value	Coefficient of determinationa		p-value		q-value	Coefficient of determinationa		p-value		q-value	Coefficient of determinationa
C14:0	142		0.960703		0.549644	0.01		0.967491		0.880341	0.01		0.883055		0.707368	0.01		0.835111		0.919861	0.01
C16:0	142		0.793472		0.52171	0.01		0.612688		0.704	0.02		0.724108		0.663769	0.02		0.382655		0.840909	0.02
C16:1(n-9)	142		0.328522		0.281263	0.02		0.178129		0.358638	0.03		0.0156005		0.114395	0.1		0.831227		0.919861	0.01
C16:1(n-7)	142		0.294459		0.269108	0.03		0.0665868		0.290807	0.04		0.166858		0.277105	0.06		0.299049		0.840909	0.03
C17:0	142		0.113295		0.125208	0.05		0.127735		0.30797	0.03		0.112931		0.216	0.06		0.960114		0.96	0.01
C17:1	142		0.573649		0.416697	0.02		0.0777263		0.290807	0.04		0.194597		0.277105	0.04		0.675129		0.919861	0.02
C18:0	142		0.823155		0.52504	0.01		0.108354		0.30797	0.03		0.0160607		0.114395	0.12		0.499554		0.840909	0.02
C18:1(n-9)	142		0.000916361	*	0.0101158	0.14		0.378512		0.573979	0.02		0.191922		0.277105	0.05		0.294941		0.840909	0.03
C18:1(n-7)	142		0.560718		0.416697	0.02		0.00364573		0.122947	0.08		0.569288		0.539053	0.02		0.783677		0.919861	0.02
C18:2(n-6)	142		0.0153147	*	0.0241404	0.08		0.14355		0.323368	0.03		0.242163		0.312632	0.04		0.233677		0.840909	0.03
C18:3(n-3)	142		0.134604		0.142105	0.04		0.841227		0.858437	0.01		0.273947		0.338581	0.03		0.393198		0.840909	0.02
C20:0	142		0.905332		0.544361	0.01		0.180534		0.358638	0.03		0.34388		0.391074	0.03		0.396539		0.840909	0.02
C20:1(n-9)	142		0.254761		0.244019	0.03		0.626742		0.704	0.02		0.561019		0.539053	0.02		0.206963		0.840909	0.03
C20:2(n-6)	142		0.017226	*	0.0241404	0.07		0.921		0.863626	0.01		0.751537		0.667895	0.02		0.107129		0.840909	0.05
C20:3(n-3)	142		0.00644349	*	0.0225965	0.11		0.0460484		0.290807	0.04		0.0451305		0.134716	0.06		0.828003		0.919861	0.01
C20:3(n-6)	142		0.00551257	*	0.0225965	0.09		0.310481		0.522105	0.02		0.0266501		0.126474	0.1		0.773422		0.919861	0.02
C20:4(n-6)	142		0.0101526	*	0.022807	0.08		0.875939		0.863626	0.01		0.0146425		0.114395	0.11		0.887602		0.919861	0.01
SFA	142		0.966189		0.549644	0.01		0.236425		0.441637	0.03		0.101901		0.216	0.07		0.806101		0.919861	0.01
MUFA	142		0.000961307	*	0.0101158	0.13		0.127208		0.30797	0.03		0.440773		0.449662	0.03		0.269658		0.840909	0.03
PUFA	142		0.00621089	*	0.0225965	0.1		0.330646		0.530927	0.02		0.113688		0.216	0.07		0.299347		0.840909	0.03
MUFA/PUFA	142		0.00918139	*	0.022807	0.09		0.298083		0.522105	0.02		0.132243		0.234474	0.06		0.365573		0.840909	0.02
MUFA/SFA	142		0.0120996	*	0.022807	0.08		0.0694773		0.290807	0.04		0.801045		0.689856	0.02		0.461445		0.840909	0.02
PUFA/SFA	142		0.0129833	*	0.022807	0.08		0.492426		0.637409	0.02		0.084173		0.199421	0.07		0.321156		0.840909	0.03
C16:1(n-7)/C16:0	142		0.22762		0.228571	0.03		0.0134662		0.227368	0.06		0.0662062		0.171043	0.08		0.475871		0.840909	0.02
C18:1(n-7)/C16:1(n-7)	142		0.334234		0.281263	0.03		0.922656		0.863626	0.01		0.205778		0.278797	0.05		0.263142		0.840909	0.03
C18:1(n-9)/C18:0	142		0.0105179	*	0.022807	0.09		0.057024		0.290807	0.04		0.401994		0.439433	0.03		0.222759		0.840909	0.03
C18:2(n-6)/C18:3(n-3)	142		0.752662		0.511375	0.02		0.417298		0.573979	0.02		0.895811		0.707368	0.01		0.894636		0.919861	0.01
C20:1(n-9)/C20:0	142		0.656141		0.460351	0.02		0.425618		0.573979	0.02		0.179535		0.277105	0.05		0.484103		0.840909	0.02
C20:3(n-6)/C18:2(n-6)	142		0.0430529		0.0567105	0.06		0.0459327		0.290807	0.04		0.0258193		0.126474	0.1		0.284986		0.840909	0.03
C20:4(n-6)/C18:2(n-6)	142		0.0165011	*	0.0241404	0.07		0.402245		0.573979	0.02		0.00811311		0.114395	0.13		0.75088		0.919861	0.02
C20:4(n-6)/C20:3(n-6)	142		0.0498045		0.0616718	0.05		0.0897044		0.302147	0.04		0.987687		0.758919	0.01		0.553417		0.852542	0.02
PI	142		0.00369744	*	0.0225965	0.11		0.588455		0.704	0.02		0.0437157		0.134716	0.09		0.439016		0.840909	0.02
DBI	142		0.0127644	*	0.022807	0.08		0.752815		0.8182	0.01		0.0446616		0.134716	0.09		0.396911		0.840909	0.02
aThe coefficient of determination reflects the genetic variability explained by each CNVR
*Statistically significant association

## Sheet: Growth trait
S5 Table. Association analysis between CNVRs and different phenotypic records in BC1_LD animals.
Trait	N		CNVR112 (GPAT2)					CNVR157 (CLCA4)					CNVR298 (MOGAT2)					CNVR447 (PRKG1)
			p-value		q-value	Coefficient of determinationa		p-value		q-value	Coefficient of determinationa		p-value		q-value	Coefficient of determinationa		p-value		q-value	Coefficient of determinationa
BW125	149		0.080393		0.316257	0.04		0.546237		0.71621	0.02		0.533193		0.969474	0.02		0.250634		0.641654	0.03
BW155	148		0.579685		0.751417	0.02		0.198424		0.505263	0.03		0.920615		0.969474	0.01		0.490353		0.715789	0.02
BW180	148		0.531628		0.746667	0.02		0.538333		0.71621	0.02		0.420225		0.969474	0.03		0.66132		0.739276	0.02
BFT125	149		0.12994		0.316257	0.04		0.854681		0.952941	0.01		0.296757		0.937895	0.04		0.600462		0.715789	0.02
BFT155	148		0.971366		0.86072	0.01		0.566943		0.71621	0.02		0.0578622		0.548526	0.1		0.816486		0.811228	0.01
BFT180	148		0.168738		0.316257	0.03		0.240097		0.505263	0.02		0.347183		0.939248	0.03		0.537603		0.715789	0.02
BFT	126		0.742605		0.857895	0.02		0.227014		0.505263	0.03		0.724974		0.969474	0.02		0.304999		0.682237	0.03
CRCL	143		8.96553e-05	*	0.00151074	0.17		0.123277		0.505263	0.03		0.768267		0.969474	0.02		0.0404556		0.362368	0.07
CW	150		0.814775		0.857895	0.01		0.977073		0.974294	0.01		0.702664		0.969474	0.02		0.750078		0.789474	0.01
HW	150		0.123762		0.316257	0.04		0.00387712		0.0735158	0.1		0.711126		0.969474	0.02		0.13842		0.483158	0.04
SW	150		0.210362		0.353684	0.03		0.136105		0.505263	0.03		0.848438		0.969474	0.01		0.365722		0.715789	0.02
BLW	149		0.0267876		0.19986	0.06		0.229535		0.505263	0.02		0.855763		0.969474	0.01		0.11571		0.483158	0.05
IMF	122		0.308977		0.47311	0.03		0.605233		0.716447	0.02		0.100837		0.637895	0.08		0.0868617		0.483158	0.06
pH45SM	114		0.781264		0.857895	0.02		0.224321		0.505263	0.03		0.903232		0.969474	0.02		0.863262		0.812798	0.02
pH24LD	150		0.0355628		0.19986	0.06		0.924019		0.972632	0.01		0.984257		0.981274	0.01		0.0211026		0.362368	0.09
pH45LD	115		0.932352		0.86072	0.02		0.537112		0.71621	0.02		0.720984		0.969474	0.02		0.596078		0.715789	0.02
aThe coefficient of determination reflects the genetic variability explained by each CNVR
*Statistically significant association
